# Supplementary material
Source: PubMed Central journal article supplement (PMC5493310)
Supplement: NIHMS865633-supplement-Supplement.pdf [file NIHMS865633-supplement-Supplement.pdf]

## SUPPLEMENTARY ONLINE CONTENT

Knudsen AB, Zauber AG, Rutter CM, et al. Estimation of benefits, burden, and harms of colorectal cancer screening strategies: modeling study for the US Preventive Services Task Force. *JAMA*. doi:10.1001/jama.2016.6828.

An interactive resource for many of the figures shown in the text and in this Supplement is available at <https://resources.cisnet.cancer.gov/projects/#cocr/uspsf/>

### List of eTables

eTable 1. Comparison of natural history model structures.

eTable 2. FIT test characteristics (per person) by cutoff for positivity.

eTable 3. Outcomes with colonoscopy screening strategies.

eTable 4. Outcomes with HSgFOBT screening strategies.

eTable 5. Outcomes with FIT screening strategies.

eTable 6. Outcomes with FIT-DNA screening strategies.

eTable 7. Outcomes with SIG screening strategies.

eTable 8. Outcomes with SIG+HSgFOBT screening strategies.

eTable 9. Outcomes with SIG+FIT screening strategies.

eTable 10. Outcomes with CTC screening strategies.

eTable 11. Efficiency ratios for stool-based screening strategies.

eTable 12. Efficiency ratios for screening strategies combining SIG with stool testing.

eTable 13. Model-recommendable strategies when the colonoscopy strategy with a five-year interval is the benchmark strategy.

eTable 14. Sensitivity analysis: Percent change in outcomes compared to the base-case analysis for model-recommendable strategies using the worst-case and best-case test characteristics.

eTable 15. Sensitivity analysis: Model-recommendable stool-based strategies with the inclusion of FIT strategies with a lower cutoff for positivity.

eTable 16. Sensitivity analysis: Model-recommendable CTC strategies using the number of procedures requiring cathartic bowel preparations as the measure of the burden of screening.

eTable 17. Efficiency ratios for colonoscopy screening strategies.

eTable 18. Efficiency ratios for SIG screening strategies.

eTable 19. Efficiency ratios for CTC screening strategies.

eTable 20. Sensitivity analysis: Efficiency ratios for stool-based screening strategies with the inclusion of FIT strategies with a lower cutoff for positivity.

eTable 21. Sensitivity analysis: Efficiency ratios for CTC screening strategies using the number of procedures requiring cathartic bowel preparation as the measure of the burden of screening.

### List of eFigures

eFigure 1. Age-specific risks of complications from colonoscopy with polypectomy.

eFigure 2. Example of the assessment of near-efficiency for weakly dominated strategies.

eFigure 3. Lifetime number of colonoscopies and life-years gained for HSgFOBT screening strategies.

eFigure 4. Lifetime number of colonoscopies and life-years gained for FIT screening strategies.

eFigure 5. Lifetime number of colonoscopies and life-years gained for FIT-DNA screening strategies.

eFigure 6. Lifetime number of colonoscopies and life-years gained for SIG screening strategies.

eFigure 7. Lifetime number of colonoscopies and life-years gained for SIG+HSgFOBT screening strategies.

eFigure 8. Lifetime number of colonoscopies and life-years gained for SIG+FIT screening strategies.

eFigure 9. Lifetime number of colonoscopies and life-years gained for CTC screening strategies.

eFigure 10. Lifetime number of colonoscopies and life-years gained for screening strategies combining SIG with stool-based testing.

**eTable 1.** Comparison of natural history model structures.

| Property                                                   | SimCRC                     | MISCAN                         | CRC-SPIN                   |
|------------------------------------------------------------|----------------------------|--------------------------------|----------------------------|
| <b>Adenoma risk</b>                                        |                            |                                |                            |
| Mechanism                                                  | Logistic function          | Poisson process                | Poisson process            |
| Risk varies:                                               |                            |                                |                            |
| Randomly across individuals                                | Yes                        | Yes                            | Yes                        |
| Systematically with age and sex                            | Yes                        | Yes                            | Yes                        |
| Systematically with race and birth-year cohort             | Yes                        | Yes                            | No                         |
| <b>Adenoma growth</b>                                      |                            |                                |                            |
| Mechanism                                                  | Time in each size category | Time in each size category     | Growth curve               |
| Size modeled as continuous                                 | No                         | No                             | Yes                        |
| Risk varies:                                               |                            |                                |                            |
| Randomly across individuals                                | Yes                        | Yes                            | Yes                        |
| Systematically with location                               | Yes <sup>a</sup>           | No                             | Yes <sup>a</sup>           |
| Transition times correlated across size categories         | No                         | Yes                            | Yes                        |
| <b>Transition to preclinical colorectal cancer</b>         |                            |                                |                            |
| Mechanism                                                  | Logistic function          | Overall transition probability | Adenoma size at transition |
| Risk varies:                                               |                            |                                |                            |
| Randomly across adenomas by size within individuals        | Yes                        | No <sup>b</sup>                | Yes                        |
| Systematically with:                                       |                            |                                |                            |
| Sex                                                        | Yes                        | No                             | Yes                        |
| Age                                                        | Yes                        | Yes <sup>c</sup>               | No                         |
| Race and other risk factors                                | Yes                        | No                             | No                         |
| Adenoma size                                               | No                         | Yes                            | Yes                        |
| Location                                                   | Yes <sup>a</sup>           | No                             | Yes <sup>a</sup>           |
| Transition times correlated across preclinical stages      | No                         | Yes                            | Not applicable             |
| <b>Transition to clinical colorectal cancer</b>            |                            |                                |                            |
| Mechanism                                                  | Time to transition         | Time to transition             | Time to transition         |
| Transition times:                                          |                            |                                |                            |
| Vary randomly across colorectal cancers within individuals | Yes                        | Yes                            | Yes                        |
| Vary systematically with:                                  |                            |                                |                            |
| Sex and race                                               | No                         | Yes                            | No                         |
| Location                                                   | Yes <sup>d</sup>           | Yes <sup>d</sup>               | Yes <sup>d</sup>           |
| Correlated with duration of preclinical colorectal cancer  | No                         | Yes                            | No                         |

CRC-SPIN indicates Colorectal Cancer Simulated Population Model for Incidence and Natural History; MISCAN, Microsimulation Screening Analysis; SimCRC, Simulation Model of Colorectal Cancer.

<sup>a</sup>Varies by proximal colon, distal colon and rectum for SimCRC and by colon and rectum for CRC-SPIN.

<sup>b</sup>The probability of transition is 0 for all non-progressive adenomas and for adenomas 1-5 mm, 0.3 for progressive adenomas 6-9 mm, and 1 for progressive adenomas ≥10 mm.

<sup>c</sup>The probability that an adenoma is progressive depends on age.

<sup>d</sup>Varies by proximal colon, distal colon and rectum for SimCRC and MISCAN and by colon and rectum for CRC-SPIN.

**eTable 2.** FIT test characteristics (per person) by cutoff for positivity.

| Analysis<br>FIT cutoff for positivity<br>Test characteristic    | Value              | Source                                                     |
|-----------------------------------------------------------------|--------------------|------------------------------------------------------------|
| Base-case and sensitivity analyses                              |                    |                                                            |
| 100 ng or more of Hb per mL of buffer<br>(≥20 µg Hb/g of feces) |                    | Imperiale et al, 2014 <sup>1</sup>                         |
| Specificity                                                     | 0.964              |                                                            |
| Sensitivity for adenomas 1-5 mm                                 | 0.076 <sup>a</sup> |                                                            |
| Sensitivity for adenomas 6-9 mm                                 | 0.238 <sup>b</sup> |                                                            |
| Sensitivity for adenomas ≥10 mm                                 | 0.738              |                                                            |
| Sensitivity analysis                                            |                    |                                                            |
| 50 ng or more of Hb per mL of buffer<br>(≥10 µg Hb/g of feces)  |                    |                                                            |
| Specificity                                                     | 0.92               | de Wijkerslooth et al, 2012 <sup>2</sup> and by assumption |
| Sensitivity for adenomas 1-5 mm                                 | 0.11 <sup>a</sup>  | de Wijkerslooth et al, 2012 <sup>2</sup> and by assumption |
| Sensitivity for adenomas 6-9 mm                                 | 0.35 <sup>b</sup>  | de Wijkerslooth et al, 2012 <sup>2</sup>                   |
| Sensitivity for adenomas ≥10 mm                                 | 0.88               | de Wijkerslooth et al, 2012 <sup>2</sup>                   |

FIT indicates fecal immunochemical test; Hb, hemoglobin.

<sup>a</sup>Sensitivity for persons with non-advanced adenomas. For persons with 1-5 mm adenomas, we assume that the sensitivity of the test is equal to the positivity rate in persons without adenomas (ie, 1 – specificity). The sensitivity for persons with 6-9 mm adenomas is chosen such that the weighted average sensitivity for persons with 1-5 mm and with 6-9 mm adenoma(s) is equal to that for non-advanced adenomas.

<sup>b</sup>Sensitivity for persons with advanced adenomas (ie, adenomas ≥10 mm and/or adenomas with advanced histology). Sensitivity was not reported for the subset of persons with ≥10 mm adenomas.

**eTable 3a.** Outcomes with colonoscopy screening strategies that vary by the ages to begin and end screening and screening interval: **SimCRC**.

| Strategy     | Outcomes per 1,000 persons free of diagnosed cancer at age 40 years |      |      |       |                |                   |                   |            |               |           |                         |             |                  |               | Reductions <sup>b</sup> (%) |  |
|--------------|---------------------------------------------------------------------|------|------|-------|----------------|-------------------|-------------------|------------|---------------|-----------|-------------------------|-------------|------------------|---------------|-----------------------------|--|
|              | Screening tests                                                     |      |      |       | Follow-up COLs | Surveillance COLs | COLs for symptoms | Total COLs | Complications | CRC cases | CRC deaths <sup>a</sup> | LY with CRC | LYG <sup>b</sup> | CRC incidence | CRC mortality               |  |
|              | Stool tests                                                         | SIGs | CTCs | COLs  |                |                   |                   |            |               |           |                         |             |                  |               |                             |  |
| No screening | 0                                                                   | 0    | 0    | 0     | 0              | 0                 | 70                | 70         | 2             | 70        | 28                      | 608         | 0                | 0             | 0                           |  |
| COL 45-75 y  |                                                                     |      |      |       |                |                   |                   |            |               |           |                         |             |                  |               |                             |  |
| 5 y          | 0                                                                   | 0    | 0    | 4,995 | 0              | 2,012             | 2                 | 7,009      | 19            | 7         | 1                       | 124         | 312              | 91            | 95                          |  |
| 10 y         | 0                                                                   | 0    | 0    | 3,053 | 0              | 1,797             | 3                 | 4,853      | 16            | 9         | 2                       | 160         | 303              | 87            | 92                          |  |
| 15 y         | 0                                                                   | 0    | 0    | 2,383 | 0              | 1,621             | 5                 | 4,009      | 15            | 13        | 3                       | 197         | 288              | 82            | 88                          |  |
| COL 45-80 y  |                                                                     |      |      |       |                |                   |                   |            |               |           |                         |             |                  |               |                             |  |
| 5 y          | 0                                                                   | 0    | 0    | 5,302 | 0              | 2,035             | 2                 | 7,339      | 21            | 6         | 1                       | 123         | 313              | 91            | 95                          |  |
| 10 y         | 0                                                                   | 0    | 0    | 3,053 | 0              | 1,797             | 3                 | 4,853      | 16            | 9         | 2                       | 160         | 303              | 87            | 92                          |  |
| 15 y         | 0                                                                   | 0    | 0    | 2,383 | 0              | 1,621             | 5                 | 4,009      | 15            | 13        | 3                       | 197         | 288              | 82            | 88                          |  |
| COL 45-85 y  |                                                                     |      |      |       |                |                   |                   |            |               |           |                         |             |                  |               |                             |  |
| 5 y          | 0                                                                   | 0    | 0    | 5,505 | 0              | 2,045             | 1                 | 7,552      | 22            | 6         | 1                       | 123         | 313              | 91            | 95                          |  |
| 10 y         | 0                                                                   | 0    | 0    | 3,281 | 0              | 1,821             | 3                 | 5,104      | 19            | 9         | 2                       | 160         | 303              | 87            | 93                          |  |
| 15 y         | 0                                                                   | 0    | 0    | 2,383 | 0              | 1,621             | 5                 | 4,009      | 15            | 13        | 3                       | 197         | 288              | 82            | 88                          |  |
| COL 50-75 y  |                                                                     |      |      |       |                |                   |                   |            |               |           |                         |             |                  |               |                             |  |
| 5 y          | 0                                                                   | 0    | 0    | 4,116 | 0              | 1,838             | 4                 | 5,959      | 18            | 10        | 3                       | 185         | 285              | 86            | 91                          |  |
| 10 y         | 0                                                                   | 0    | 0    | 2,388 | 0              | 1,612             | 6                 | 4,007      | 14            | 13        | 4                       | 216         | 275              | 81            | 87                          |  |
| 15 y         | 0                                                                   | 0    | 0    | 1,761 | 0              | 1,416             | 11                | 3,187      | 12            | 17        | 5                       | 246         | 260              | 75            | 81                          |  |
| COL 50-80 y  |                                                                     |      |      |       |                |                   |                   |            |               |           |                         |             |                  |               |                             |  |
| 5 y          | 0                                                                   | 0    | 0    | 4,424 | 0              | 1,861             | 3                 | 6,289      | 20            | 9         | 2                       | 184         | 286              | 87            | 92                          |  |
| 10 y         | 0                                                                   | 0    | 0    | 2,738 | 0              | 1,663             | 4                 | 4,405      | 17            | 12        | 3                       | 214         | 277              | 83            | 89                          |  |
| 15 y         | 0                                                                   | 0    | 0    | 2,152 | 0              | 1,498             | 6                 | 3,656      | 16            | 15        | 4                       | 245         | 265              | 78            | 86                          |  |
| COL 50-85 y  |                                                                     |      |      |       |                |                   |                   |            |               |           |                         |             |                  |               |                             |  |
| 5 y          | 0                                                                   | 0    | 0    | 4,627 | 0              | 1,872             | 3                 | 6,502      | 22            | 9         | 2                       | 183         | 286              | 87            | 92                          |  |
| 10 y         | 0                                                                   | 0    | 0    | 2,738 | 0              | 1,663             | 4                 | 4,405      | 17            | 12        | 3                       | 214         | 277              | 83            | 89                          |  |
| 15 y         | 0                                                                   | 0    | 0    | 2,152 | 0              | 1,498             | 6                 | 3,656      | 16            | 15        | 4                       | 245         | 265              | 78            | 86                          |  |
| COL 55-75 y  |                                                                     |      |      |       |                |                   |                   |            |               |           |                         |             |                  |               |                             |  |
| 5 y          | 0                                                                   | 0    | 0    | 3,297 | 0              | 1,622             | 7                 | 4,926      | 18            | 14        | 4                       | 261         | 250              | 80            | 85                          |  |
| 10 y         | 0                                                                   | 0    | 0    | 2,161 | 0              | 1,466             | 8                 | 3,635      | 16            | 16        | 5                       | 285         | 243              | 76            | 83                          |  |
| 15 y         | 0                                                                   | 0    | 0    | 1,632 | 0              | 1,325             | 11                | 2,968      | 13            | 20        | 6                       | 307         | 233              | 72            | 79                          |  |
| COL 55-80 y  |                                                                     |      |      |       |                |                   |                   |            |               |           |                         |             |                  |               |                             |  |
| 5 y          | 0                                                                   | 0    | 0    | 3,605 | 0              | 1,644             | 6                 | 5,256      | 20            | 14        | 4                       | 260         | 251              | 80            | 86                          |  |
| 10 y         | 0                                                                   | 0    | 0    | 2,161 | 0              | 1,466             | 8                 | 3,635      | 16            | 16        | 5                       | 285         | 243              | 76            | 83                          |  |
| 15 y         | 0                                                                   | 0    | 0    | 1,632 | 0              | 1,325             | 11                | 2,968      | 13            | 20        | 6                       | 307         | 233              | 72            | 79                          |  |
| COL 55-85 y  |                                                                     |      |      |       |                |                   |                   |            |               |           |                         |             |                  |               |                             |  |
| 5 y          | 0                                                                   | 0    | 0    | 3,807 | 0              | 1,655             | 6                 | 5,468      | 21            | 14        | 4                       | 260         | 251              | 80            | 86                          |  |
| 10 y         | 0                                                                   | 0    | 0    | 2,389 | 0              | 1,491             | 7                 | 3,887      | 18            | 16        | 4                       | 285         | 243              | 77            | 84                          |  |
| 15 y         | 0                                                                   | 0    | 0    | 1,888 | 0              | 1,365             | 9                 | 3,262      | 17            | 19        | 5                       | 308         | 234              | 73            | 81                          |  |

COL indicates colonoscopy; CRC, colorectal cancer; CTC, computed tomographic colonography; LY, life-years; LYG, LY gained compared with no screening; SIG, flexible sigmoidoscopy; SimCRC, Simulation Model of CRC.

<sup>a</sup> Including deaths from complications of screening.

<sup>b</sup> Compared with no screening.

**eTable 3b.** Outcomes with colonoscopy screening strategies that vary by the ages to begin and end screening and screening interval: **MISCAN**.

| Strategy     | Outcomes per 1,000 persons free of diagnosed cancer at age 40 years |      |      |       |                |                   |                   |            |               |           |                         |             |                  |               | Reductions <sup>b</sup> (%) |  |
|--------------|---------------------------------------------------------------------|------|------|-------|----------------|-------------------|-------------------|------------|---------------|-----------|-------------------------|-------------|------------------|---------------|-----------------------------|--|
|              | Screening tests                                                     |      |      |       | Follow-up COLs | Surveillance COLs | COLs for symptoms | Total COLs | Complications | CRC cases | CRC deaths <sup>a</sup> | LY with CRC | LYG <sup>b</sup> | CRC incidence | CRC mortality               |  |
|              | Stool tests                                                         | SIGs | CTCs | COLs  |                |                   |                   |            |               |           |                         |             |                  |               |                             |  |
| No screening | 0                                                                   | 0    | 0    | 0     | 0              | 0                 | 67                | 67         | 1             | 67        | 28                      | 565         | 0                | 0             | 0                           |  |
| COL 45-75 y  |                                                                     |      |      |       |                |                   |                   |            |               |           |                         |             |                  |               |                             |  |
| 5 y          | 0                                                                   | 0    | 0    | 4,826 | 0              | 2,156             | 7                 | 6,989      | 18            | 20        | 4                       | 298         | 281              | 70            | 86                          |  |
| 10 y         | 0                                                                   | 0    | 0    | 2,967 | 0              | 1,953             | 9                 | 4,928      | 16            | 23        | 5                       | 337         | 262              | 65            | 82                          |  |
| 15 y         | 0                                                                   | 0    | 0    | 2,328 | 0              | 1,780             | 12                | 4,119      | 15            | 26        | 6                       | 367         | 244              | 60            | 77                          |  |
| COL 45-80 y  |                                                                     |      |      |       |                |                   |                   |            |               |           |                         |             |                  |               |                             |  |
| 5 y          | 0                                                                   | 0    | 0    | 5,158 | 0              | 2,172             | 6                 | 7,337      | 20            | 19        | 4                       | 297         | 282              | 71            | 87                          |  |
| 10 y         | 0                                                                   | 0    | 0    | 2,967 | 0              | 1,953             | 9                 | 4,928      | 16            | 23        | 5                       | 337         | 262              | 65            | 82                          |  |
| 15 y         | 0                                                                   | 0    | 0    | 2,328 | 0              | 1,780             | 12                | 4,119      | 15            | 26        | 6                       | 367         | 244              | 60            | 77                          |  |
| COL 45-85 y  |                                                                     |      |      |       |                |                   |                   |            |               |           |                         |             |                  |               |                             |  |
| 5 y          | 0                                                                   | 0    | 0    | 5,384 | 0              | 2,176             | 6                 | 7,566      | 21            | 19        | 4                       | 297         | 282              | 71            | 87                          |  |
| 10 y         | 0                                                                   | 0    | 0    | 3,211 | 0              | 1,965             | 8                 | 5,185      | 18            | 23        | 5                       | 338         | 263              | 65            | 83                          |  |
| 15 y         | 0                                                                   | 0    | 0    | 2,328 | 0              | 1,780             | 12                | 4,119      | 15            | 26        | 6                       | 367         | 244              | 60            | 77                          |  |
| COL 50-75 y  |                                                                     |      |      |       |                |                   |                   |            |               |           |                         |             |                  |               |                             |  |
| 5 y          | 0                                                                   | 0    | 0    | 3,982 | 0              | 1,958             | 8                 | 5,948      | 18            | 21        | 5                       | 326         | 264              | 68            | 84                          |  |
| 10 y         | 0                                                                   | 0    | 0    | 2,316 | 0              | 1,774             | 11                | 4,101      | 15            | 25        | 6                       | 360         | 248              | 62            | 79                          |  |
| 15 y         | 0                                                                   | 0    | 0    | 1,723 | 0              | 1,615             | 16                | 3,353      | 13            | 29        | 8                       | 381         | 228              | 57            | 73                          |  |
| COL 50-80 y  |                                                                     |      |      |       |                |                   |                   |            |               |           |                         |             |                  |               |                             |  |
| 5 y          | 0                                                                   | 0    | 0    | 4,315 | 0              | 1,974             | 7                 | 6,296      | 20            | 21        | 4                       | 326         | 265              | 69            | 85                          |  |
| 10 y         | 0                                                                   | 0    | 0    | 2,671 | 0              | 1,805             | 9                 | 4,485      | 17            | 24        | 5                       | 360         | 251              | 64            | 81                          |  |
| 15 y         | 0                                                                   | 0    | 0    | 2,104 | 0              | 1,663             | 12                | 3,779      | 16            | 27        | 6                       | 384         | 234              | 59            | 77                          |  |
| COL 50-85 y  |                                                                     |      |      |       |                |                   |                   |            |               |           |                         |             |                  |               |                             |  |
| 5 y          | 0                                                                   | 0    | 0    | 4,541 | 0              | 1,978             | 7                 | 6,525      | 21            | 21        | 4                       | 326         | 266              | 69            | 85                          |  |
| 10 y         | 0                                                                   | 0    | 0    | 2,671 | 0              | 1,805             | 9                 | 4,485      | 17            | 24        | 5                       | 360         | 251              | 64            | 81                          |  |
| 15 y         | 0                                                                   | 0    | 0    | 2,104 | 0              | 1,663             | 12                | 3,779      | 16            | 27        | 6                       | 384         | 234              | 59            | 77                          |  |
| COL 55-75 y  |                                                                     |      |      |       |                |                   |                   |            |               |           |                         |             |                  |               |                             |  |
| 5 y          | 0                                                                   | 0    | 0    | 3,211 | 0              | 1,702             | 10                | 4,923      | 17            | 24        | 6                       | 366         | 238              | 64            | 80                          |  |
| 10 y         | 0                                                                   | 0    | 0    | 2,108 | 0              | 1,577             | 12                | 3,697      | 15            | 27        | 7                       | 390         | 226              | 60            | 76                          |  |
| 15 y         | 0                                                                   | 0    | 0    | 1,596 | 0              | 1,467             | 15                | 3,079      | 14            | 29        | 8                       | 407         | 214              | 56            | 72                          |  |
| COL 55-80 y  |                                                                     |      |      |       |                |                   |                   |            |               |           |                         |             |                  |               |                             |  |
| 5 y          | 0                                                                   | 0    | 0    | 3,544 | 0              | 1,718             | 9                 | 5,271      | 19            | 24        | 5                       | 365         | 239              | 65            | 81                          |  |
| 10 y         | 0                                                                   | 0    | 0    | 2,108 | 0              | 1,577             | 12                | 3,697      | 15            | 27        | 7                       | 390         | 226              | 60            | 76                          |  |
| 15 y         | 0                                                                   | 0    | 0    | 1,596 | 0              | 1,467             | 15                | 3,079      | 14            | 29        | 8                       | 407         | 214              | 56            | 72                          |  |
| COL 55-85 y  |                                                                     |      |      |       |                |                   |                   |            |               |           |                         |             |                  |               |                             |  |
| 5 y          | 0                                                                   | 0    | 0    | 3,770 | 0              | 1,722             | 9                 | 5,500      | 20            | 23        | 5                       | 365         | 239              | 65            | 81                          |  |
| 10 y         | 0                                                                   | 0    | 0    | 2,353 | 0              | 1,590             | 11                | 3,954      | 17            | 26        | 6                       | 392         | 227              | 60            | 77                          |  |
| 15 y         | 0                                                                   | 0    | 0    | 1,858 | 0              | 1,488             | 13                | 3,359      | 16            | 29        | 7                       | 410         | 216              | 56            | 74                          |  |

COL indicates colonoscopy; CRC, colorectal cancer; CTC, computed tomographic colonography; LY, life-years; LYG, LY gained compared with no screening; MISCAN, Microsimulation Screening Analysis; SIG, flexible sigmoidoscopy.

<sup>a</sup> Including deaths from complications of screening.

<sup>b</sup> Compared with no screening.

**eTable 3c.** Outcomes with colonoscopy screening strategies that vary by the ages to begin and end screening and screening interval: **CRC-SPIN**.

| Strategy     | Outcomes per 1,000 persons free of diagnosed cancer at age 40 years |      |      |       |                |                   |                   |            |               |           |                         |             |                  |               | Reductions <sup>b</sup> (%) |  |
|--------------|---------------------------------------------------------------------|------|------|-------|----------------|-------------------|-------------------|------------|---------------|-----------|-------------------------|-------------|------------------|---------------|-----------------------------|--|
|              | Screening tests                                                     |      |      |       | Follow-up COLs | Surveillance COLs | COLs for symptoms | Total COLs | Complications | CRC cases | CRC deaths <sup>a</sup> | LY with CRC | LYG <sup>b</sup> | CRC incidence | CRC mortality               |  |
|              | Stool tests                                                         | SIGs | CTCs | COLs  |                |                   |                   |            |               |           |                         |             |                  |               |                             |  |
| No screening | 0                                                                   | 0    | 0    | 0     | 0              | 0                 | 72                | 72         | 2             | 72        | 27                      | 610         | 0                | 0             | 0                           |  |
| COL 45-75 y  |                                                                     |      |      |       |                |                   |                   |            |               |           |                         |             |                  |               |                             |  |
| 5 y          | 0                                                                   | 0    | 0    | 4,974 | 0              | 2,062             | 3                 | 7,039      | 19            | 4         | 1                       | 53          | 297              | 95            | 96                          |  |
| 10 y         | 0                                                                   | 0    | 0    | 3,038 | 0              | 1,863             | 4                 | 4,906      | 17            | 6         | 2                       | 72          | 289              | 92            | 94                          |  |
| 15 y         | 0                                                                   | 0    | 0    | 2,372 | 0              | 1,704             | 6                 | 4,081      | 16            | 8         | 2                       | 96          | 279              | 89            | 91                          |  |
| COL 45-80 y  |                                                                     |      |      |       |                |                   |                   |            |               |           |                         |             |                  |               |                             |  |
| 5 y          | 0                                                                   | 0    | 0    | 5,308 | 0              | 2,085             | 2                 | 7,395      | 21            | 3         | 1                       | 51          | 297              | 96            | 97                          |  |
| 10 y         | 0                                                                   | 0    | 0    | 3,038 | 0              | 1,863             | 4                 | 4,906      | 17            | 6         | 2                       | 72          | 289              | 92            | 94                          |  |
| 15 y         | 0                                                                   | 0    | 0    | 2,372 | 0              | 1,704             | 6                 | 4,081      | 16            | 8         | 2                       | 96          | 279              | 89            | 91                          |  |
| COL 45-85 y  |                                                                     |      |      |       |                |                   |                   |            |               |           |                         |             |                  |               |                             |  |
| 5 y          | 0                                                                   | 0    | 0    | 5,532 | 0              | 2,096             | 2                 | 7,630      | 23            | 3         | 1                       | 50          | 298              | 96            | 97                          |  |
| 10 y         | 0                                                                   | 0    | 0    | 3,286 | 0              | 1,889             | 3                 | 5,178      | 19            | 5         | 1                       | 71          | 290              | 93            | 95                          |  |
| 15 y         | 0                                                                   | 0    | 0    | 2,372 | 0              | 1,704             | 6                 | 4,081      | 16            | 8         | 2                       | 96          | 279              | 89            | 91                          |  |
| COL 50-75 y  |                                                                     |      |      |       |                |                   |                   |            |               |           |                         |             |                  |               |                             |  |
| 5 y          | 0                                                                   | 0    | 0    | 4,120 | 0              | 1,870             | 4                 | 5,995      | 19            | 6         | 2                       | 95          | 279              | 92            | 94                          |  |
| 10 y         | 0                                                                   | 0    | 0    | 2,376 | 0              | 1,666             | 7                 | 4,049      | 15            | 9         | 3                       | 117         | 270              | 88            | 90                          |  |
| 15 y         | 0                                                                   | 0    | 0    | 1,751 | 0              | 1,496             | 11                | 3,258      | 13            | 13        | 4                       | 143         | 257              | 82            | 85                          |  |
| COL 50-80 y  |                                                                     |      |      |       |                |                   |                   |            |               |           |                         |             |                  |               |                             |  |
| 5 y          | 0                                                                   | 0    | 0    | 4,455 | 0              | 1,892             | 4                 | 6,351      | 21            | 5         | 1                       | 93          | 280              | 93            | 94                          |  |
| 10 y         | 0                                                                   | 0    | 0    | 2,746 | 0              | 1,713             | 5                 | 4,464      | 18            | 7         | 2                       | 111         | 273              | 90            | 93                          |  |
| 15 y         | 0                                                                   | 0    | 0    | 2,154 | 0              | 1,568             | 7                 | 3,728      | 17            | 9         | 3                       | 132         | 264              | 87            | 90                          |  |
| COL 50-85 y  |                                                                     |      |      |       |                |                   |                   |            |               |           |                         |             |                  |               |                             |  |
| 5 y          | 0                                                                   | 0    | 0    | 4,678 | 0              | 1,905             | 3                 | 6,586      | 22            | 5         | 1                       | 93          | 280              | 93            | 95                          |  |
| 10 y         | 0                                                                   | 0    | 0    | 2,746 | 0              | 1,713             | 5                 | 4,464      | 18            | 7         | 2                       | 111         | 273              | 90            | 93                          |  |
| 15 y         | 0                                                                   | 0    | 0    | 2,154 | 0              | 1,568             | 7                 | 3,728      | 17            | 9         | 3                       | 132         | 264              | 87            | 90                          |  |
| COL 55-75 y  |                                                                     |      |      |       |                |                   |                   |            |               |           |                         |             |                  |               |                             |  |
| 5 y          | 0                                                                   | 0    | 0    | 3,322 | 0              | 1,637             | 7                 | 4,966      | 18            | 9         | 3                       | 155         | 251              | 87            | 89                          |  |
| 10 y         | 0                                                                   | 0    | 0    | 2,168 | 0              | 1,501             | 8                 | 3,677      | 16            | 11        | 3                       | 170         | 245              | 85            | 88                          |  |
| 15 y         | 0                                                                   | 0    | 0    | 1,630 | 0              | 1,374             | 11                | 3,015      | 14            | 14        | 4                       | 188         | 236              | 81            | 84                          |  |
| COL 55-80 y  |                                                                     |      |      |       |                |                   |                   |            |               |           |                         |             |                  |               |                             |  |
| 5 y          | 0                                                                   | 0    | 0    | 3,656 | 0              | 1,660             | 6                 | 5,322      | 20            | 9         | 3                       | 153         | 252              | 88            | 90                          |  |
| 10 y         | 0                                                                   | 0    | 0    | 2,168 | 0              | 1,501             | 8                 | 3,677      | 16            | 11        | 3                       | 170         | 245              | 85            | 88                          |  |
| 15 y         | 0                                                                   | 0    | 0    | 1,630 | 0              | 1,374             | 11                | 3,015      | 14            | 14        | 4                       | 188         | 236              | 81            | 84                          |  |
| COL 55-85 y  |                                                                     |      |      |       |                |                   |                   |            |               |           |                         |             |                  |               |                             |  |
| 5 y          | 0                                                                   | 0    | 0    | 3,879 | 0              | 1,672             | 6                 | 5,557      | 22            | 8         | 3                       | 153         | 253              | 89            | 91                          |  |
| 10 y         | 0                                                                   | 0    | 0    | 2,416 | 0              | 1,525             | 7                 | 3,949      | 19            | 10        | 3                       | 168         | 246              | 86            | 89                          |  |
| 15 y         | 0                                                                   | 0    | 0    | 1,902 | 0              | 1,413             | 9                 | 3,324      | 17            | 12        | 4                       | 185         | 239              | 83            | 86                          |  |

COL indicates colonoscopy; CRC, colorectal cancer; CRC-SPIN, CRC Simulated Population Model for Incidence and Natural History; CTC, computed tomographic colonography; LY, life-years; LYG, LY gained compared with no screening; SIG, flexible sigmoidoscopy.

<sup>a</sup> Including deaths from complications of screening.

<sup>b</sup> Compared with no screening.

**eTable 4a.** Outcomes with HSgFOBT screening strategies that vary by the ages to begin and end screening and screening interval: **SimCRC**.

| Strategy        | Outcomes per 1,000 persons free of diagnosed cancer at age 40 years |             |      |      |                |                   |                   |            |               |           |                         |             |                  |               | Reductions <sup>b</sup> (%) |      |
|-----------------|---------------------------------------------------------------------|-------------|------|------|----------------|-------------------|-------------------|------------|---------------|-----------|-------------------------|-------------|------------------|---------------|-----------------------------|------|
|                 | Screening tests                                                     |             |      |      | Follow-up COLs | Surveillance COLs | COLs for symptoms | Total COLs | Complications | CRC cases | CRC deaths <sup>a</sup> | LY with CRC | LYG <sup>b</sup> | CRC incidence | CRC mortality               |      |
|                 | Modality, age to begin-end Screening interval                       | Stool tests | SIGs | CTCs |                |                   |                   |            |               |           |                         |             |                  |               |                             | COLs |
| No screening    | 0                                                                   | 0           | 0    | 0    | 0              | 0                 | 70                | 70         | 2             | 70        | 28                      | 608         | 0                | 0             | 0                           |      |
| HSgFOBT 45-75 y |                                                                     |             |      |      |                |                   |                   |            |               |           |                         |             |                  |               |                             |      |
| 1 y             | 15,590                                                              | 0           | 0    | 0    | 1,337          | 1,220             | 7                 | 2,564      | 11            | 18        | 4                       | 292         | 288              | 74            | 86                          |      |
| 2 y             | 10,349                                                              | 0           | 0    | 0    | 920            | 936               | 11                | 1,867      | 9             | 27        | 6                       | 400         | 263              | 61            | 78                          |      |
| 3 y             | 7,749                                                               | 0           | 0    | 0    | 706            | 757               | 16                | 1,479      | 8             | 34        | 8                       | 464         | 237              | 52            | 70                          |      |
| HSgFOBT 45-80 y |                                                                     |             |      |      |                |                   |                   |            |               |           |                         |             |                  |               |                             |      |
| 1 y             | 16,862                                                              | 0           | 0    | 0    | 1,450          | 1,256             | 5                 | 2,711      | 12            | 17        | 3                       | 293         | 292              | 76            | 89                          |      |
| 2 y             | 11,061                                                              | 0           | 0    | 0    | 989            | 963               | 8                 | 1,960      | 10            | 26        | 5                       | 405         | 268              | 63            | 82                          |      |
| 3 y             | 8,360                                                               | 0           | 0    | 0    | 767            | 782               | 12                | 1,561      | 9             | 33        | 7                       | 471         | 243              | 53            | 74                          |      |
| HSgFOBT 45-85 y |                                                                     |             |      |      |                |                   |                   |            |               |           |                         |             |                  |               |                             |      |
| 1 y             | 17,756                                                              | 0           | 0    | 0    | 1,530          | 1,275             | 4                 | 2,808      | 14            | 17        | 3                       | 295         | 293              | 76            | 90                          |      |
| 2 y             | 11,820                                                              | 0           | 0    | 0    | 1,062          | 986               | 6                 | 2,054      | 11            | 26        | 5                       | 410         | 271              | 63            | 84                          |      |
| 3 y             | 8,932                                                               | 0           | 0    | 0    | 826            | 803               | 9                 | 1,639      | 10            | 33        | 7                       | 479         | 246              | 53            | 77                          |      |
| HSgFOBT 50-75 y |                                                                     |             |      |      |                |                   |                   |            |               |           |                         |             |                  |               |                             |      |
| 1 y             | 12,914                                                              | 0           | 0    | 0    | 1,130          | 1,090             | 9                 | 2,230      | 11            | 22        | 5                       | 350         | 261              | 69            | 82                          |      |
| 2 y             | 8,388                                                               | 0           | 0    | 0    | 764            | 819               | 14                | 1,597      | 9             | 31        | 7                       | 447         | 235              | 56            | 73                          |      |
| 3 y             | 6,456                                                               | 0           | 0    | 0    | 604            | 664               | 18                | 1,286      | 7             | 37        | 10                      | 505         | 212              | 47            | 66                          |      |
| HSgFOBT 50-80 y |                                                                     |             |      |      |                |                   |                   |            |               |           |                         |             |                  |               |                             |      |
| 1 y             | 14,193                                                              | 0           | 0    | 0    | 1,244          | 1,127             | 7                 | 2,377      | 12            | 20        | 4                       | 351         | 265              | 71            | 85                          |      |
| 2 y             | 9,462                                                               | 0           | 0    | 0    | 867            | 861               | 10                | 1,738      | 10            | 29        | 6                       | 454         | 243              | 58            | 78                          |      |
| 3 y             | 7,125                                                               | 0           | 0    | 0    | 673            | 697               | 14                | 1,383      | 9             | 36        | 8                       | 513         | 220              | 49            | 71                          |      |
| HSgFOBT 50-85 y |                                                                     |             |      |      |                |                   |                   |            |               |           |                         |             |                  |               |                             |      |
| 1 y             | 15,090                                                              | 0           | 0    | 0    | 1,324          | 1,146             | 5                 | 2,476      | 13            | 20        | 4                       | 353         | 266              | 71            | 86                          |      |
| 2 y             | 9,970                                                               | 0           | 0    | 0    | 917            | 877               | 8                 | 1,801      | 11            | 29        | 6                       | 458         | 245              | 59            | 80                          |      |
| 3 y             | 7,565                                                               | 0           | 0    | 0    | 717            | 712               | 12                | 1,441      | 9             | 36        | 8                       | 519         | 222              | 49            | 73                          |      |
| HSgFOBT 55-75 y |                                                                     |             |      |      |                |                   |                   |            |               |           |                         |             |                  |               |                             |      |
| 1 y             | 10,357                                                              | 0           | 0    | 0    | 932            | 931               | 13                | 1,876      | 10            | 27        | 7                       | 420         | 226              | 62            | 76                          |      |
| 2 y             | 6,897                                                               | 0           | 0    | 0    | 649            | 698               | 17                | 1,364      | 8             | 35        | 9                       | 506         | 204              | 50            | 68                          |      |
| 3 y             | 5,014                                                               | 0           | 0    | 0    | 484            | 545               | 23                | 1,052      | 7             | 42        | 12                      | 548         | 178              | 40            | 58                          |      |
| HSgFOBT 55-80 y |                                                                     |             |      |      |                |                   |                   |            |               |           |                         |             |                  |               |                             |      |
| 1 y             | 11,637                                                              | 0           | 0    | 0    | 1,047          | 969               | 10                | 2,025      | 12            | 25        | 6                       | 420         | 231              | 64            | 79                          |      |
| 2 y             | 7,622                                                               | 0           | 0    | 0    | 720            | 728               | 13                | 1,461      | 9             | 34        | 8                       | 511         | 209              | 51            | 72                          |      |
| 3 y             | 5,872                                                               | 0           | 0    | 0    | 572            | 588               | 17                | 1,177      | 8             | 40        | 10                      | 559         | 188              | 43            | 65                          |      |
| HSgFOBT 55-85 y |                                                                     |             |      |      |                |                   |                   |            |               |           |                         |             |                  |               |                             |      |
| 1 y             | 12,539                                                              | 0           | 0    | 0    | 1,127          | 989               | 8                 | 2,125      | 13            | 25        | 5                       | 422         | 232              | 64            | 81                          |      |
| 2 y             | 8,390                                                               | 0           | 0    | 0    | 795            | 752               | 11                | 1,558      | 11            | 34        | 7                       | 517         | 212              | 52            | 74                          |      |
| 3 y             | 6,352                                                               | 0           | 0    | 0    | 623            | 607               | 14                | 1,244      | 9             | 40        | 9                       | 566         | 191              | 43            | 67                          |      |

COL indicates colonoscopy; CRC, colorectal cancer; CTC, computed tomographic colonography; HSgFOBT, high-sensitivity guaiac-based fecal occult blood test; LY, life-years; LYG, LY gained compared with no screening; SIG, flexible sigmoidoscopy; SimCRC, Simulation Model of CRC.

<sup>a</sup> Including deaths from complications of screening.

<sup>b</sup> Compared with no screening.



**eTable 4b.** Outcomes with HSgFOBT screening strategies that vary by the ages to begin and end screening and screening interval: **MISCAN**.

| Strategy        | Outcomes per 1,000 persons free of diagnosed cancer at age 40 years |      |      |      |                |                   |                   |            |               |           |                         |             |                  |               | Reductions <sup>b</sup> (%) |  |
|-----------------|---------------------------------------------------------------------|------|------|------|----------------|-------------------|-------------------|------------|---------------|-----------|-------------------------|-------------|------------------|---------------|-----------------------------|--|
|                 | Screening tests                                                     |      |      |      | Follow-up COLs | Surveillance COLs | COLs for symptoms | Total COLs | Complications | CRC cases | CRC deaths <sup>a</sup> | LY with CRC | LYG <sup>b</sup> | CRC incidence | CRC mortality               |  |
|                 | Stool tests                                                         | SIGs | CTCs | COLs |                |                   |                   |            |               |           |                         |             |                  |               |                             |  |
| No screening    | 0                                                                   | 0    | 0    | 0    | 0              | 0                 | 67                | 67         | 1             | 67        | 28                      | 565         | 0                | 0             | 0                           |  |
| HSgFOBT 45-75 y |                                                                     |      |      |      |                |                   |                   |            |               |           |                         |             |                  |               |                             |  |
| 1 y             | 15,562                                                              | 0    | 0    | 0    | 1,303          | 1,314             | 13                | 2,630      | 11            | 32        | 7                       | 464         | 247              | 52            | 75                          |  |
| 2 y             | 10,351                                                              | 0    | 0    | 0    | 897            | 995               | 18                | 1,909      | 9             | 40        | 9                       | 548         | 217              | 40            | 67                          |  |
| 3 y             | 7,719                                                               | 0    | 0    | 0    | 685            | 799               | 23                | 1,508      | 8             | 45        | 11                      | 587         | 190              | 32            | 59                          |  |
| HSgFOBT 45-80 y |                                                                     |      |      |      |                |                   |                   |            |               |           |                         |             |                  |               |                             |  |
| 1 y             | 16,849                                                              | 0    | 0    | 0    | 1,410          | 1,337             | 10                | 2,757      | 12            | 31        | 6                       | 468         | 252              | 53            | 78                          |  |
| 2 y             | 11,071                                                              | 0    | 0    | 0    | 960            | 1,015             | 15                | 1,990      | 10            | 39        | 8                       | 555         | 223              | 41            | 70                          |  |
| 3 y             | 8,129                                                               | 0    | 0    | 0    | 724            | 813               | 21                | 1,557      | 9             | 45        | 11                      | 595         | 195              | 33            | 61                          |  |
| HSgFOBT 45-85 y |                                                                     |      |      |      |                |                   |                   |            |               |           |                         |             |                  |               |                             |  |
| 1 y             | 17,782                                                              | 0    | 0    | 0    | 1,487          | 1,349             | 9                 | 2,845      | 13            | 31        | 6                       | 471         | 254              | 53            | 80                          |  |
| 2 y             | 11,855                                                              | 0    | 0    | 0    | 1,029          | 1,030             | 13                | 2,072      | 11            | 39        | 8                       | 563         | 226              | 41            | 72                          |  |
| 3 y             | 8,750                                                               | 0    | 0    | 0    | 782            | 829               | 17                | 1,628      | 9             | 45        | 10                      | 607         | 199              | 32            | 65                          |  |
| HSgFOBT 50-75 y |                                                                     |      |      |      |                |                   |                   |            |               |           |                         |             |                  |               |                             |  |
| 1 y             | 12,927                                                              | 0    | 0    | 0    | 1,103          | 1,169             | 14                | 2,287      | 11            | 34        | 8                       | 487         | 232              | 49            | 73                          |  |
| 2 y             | 8,408                                                               | 0    | 0    | 0    | 745            | 870               | 21                | 1,636      | 9             | 42        | 10                      | 564         | 200              | 37            | 63                          |  |
| 3 y             | 6,302                                                               | 0    | 0    | 0    | 574            | 697               | 25                | 1,296      | 8             | 47        | 12                      | 598         | 175              | 30            | 55                          |  |
| HSgFOBT 50-80 y |                                                                     |      |      |      |                |                   |                   |            |               |           |                         |             |                  |               |                             |  |
| 1 y             | 14,223                                                              | 0    | 0    | 0    | 1,211          | 1,194             | 12                | 2,416      | 12            | 33        | 7                       | 492         | 237              | 51            | 76                          |  |
| 2 y             | 9,497                                                               | 0    | 0    | 0    | 842            | 901               | 16                | 1,759      | 10            | 41        | 9                       | 575         | 209              | 39            | 68                          |  |
| 3 y             | 7,106                                                               | 0    | 0    | 0    | 649            | 726               | 21                | 1,395      | 9             | 46        | 11                      | 613         | 184              | 31            | 61                          |  |
| HSgFOBT 50-85 y |                                                                     |      |      |      |                |                   |                   |            |               |           |                         |             |                  |               |                             |  |
| 1 y             | 15,161                                                              | 0    | 0    | 0    | 1,289          | 1,206             | 10                | 2,505      | 13            | 33        | 6                       | 495         | 239              | 51            | 78                          |  |
| 2 y             | 10,024                                                              | 0    | 0    | 0    | 888            | 912               | 14                | 1,814      | 11            | 41        | 8                       | 581         | 211              | 39            | 70                          |  |
| 3 y             | 7,408                                                               | 0    | 0    | 0    | 677            | 733               | 19                | 1,430      | 9             | 46        | 11                      | 619         | 186              | 30            | 62                          |  |
| HSgFOBT 55-75 y |                                                                     |      |      |      |                |                   |                   |            |               |           |                         |             |                  |               |                             |  |
| 1 y             | 10,427                                                              | 0    | 0    | 0    | 913            | 984               | 17                | 1,913      | 11            | 37        | 9                       | 520         | 206              | 45            | 69                          |  |
| 2 y             | 6,940                                                               | 0    | 0    | 0    | 634            | 729               | 22                | 1,386      | 9             | 44        | 11                      | 588         | 178              | 33            | 60                          |  |
| 3 y             | 4,912                                                               | 0    | 0    | 0    | 462            | 568               | 29                | 1,059      | 7             | 50        | 14                      | 611         | 152              | 26            | 50                          |  |
| HSgFOBT 55-80 y |                                                                     |      |      |      |                |                   |                   |            |               |           |                         |             |                  |               |                             |  |
| 1 y             | 11,733                                                              | 0    | 0    | 0    | 1,022          | 1,011             | 14                | 2,047      | 12            | 36        | 8                       | 524         | 212              | 46            | 72                          |  |
| 2 y             | 7,678                                                               | 0    | 0    | 0    | 701            | 752               | 19                | 1,472      | 9             | 44        | 10                      | 596         | 184              | 35            | 64                          |  |
| 3 y             | 5,773                                                               | 0    | 0    | 0    | 544            | 603               | 23                | 1,170      | 8             | 49        | 12                      | 628         | 163              | 27            | 56                          |  |
| HSgFOBT 55-85 y |                                                                     |      |      |      |                |                   |                   |            |               |           |                         |             |                  |               |                             |  |
| 1 y             | 12,679                                                              | 0    | 0    | 0    | 1,101          | 1,024             | 12                | 2,137      | 13            | 35        | 7                       | 527         | 214              | 47            | 74                          |  |
| 2 y             | 8,478                                                               | 0    | 0    | 0    | 772            | 769               | 16                | 1,557      | 11            | 44        | 9                       | 605         | 188              | 35            | 66                          |  |
| 3 y             | 6,359                                                               | 0    | 0    | 0    | 599            | 618               | 20                | 1,238      | 9             | 49        | 11                      | 639         | 166              | 27            | 59                          |  |

COL indicates colonoscopy; CRC, colorectal cancer; CTC, computed tomographic colonography; HSgFOBT, high-sensitivity guaiac-based fecal occult blood test; LY, life-years; LYG, LY gained compared with no screening; MISCAN, Microsimulation Screening Analysis; SIG, flexible sigmoidoscopy.

<sup>a</sup> Including deaths from complications of screening.

<sup>b</sup> Compared with no screening.

**eTable 4c.** Outcomes with HSgFOBT screening strategies that vary by the ages to begin and end screening and screening interval: **CRC-SPIN**.

| Strategy        | Outcomes per 1,000 persons free of diagnosed cancer at age 40 years |      |      |      |                |                   |                   |            |               |           |                         |             |                  |               | Reductions <sup>b</sup> (%) |  |
|-----------------|---------------------------------------------------------------------|------|------|------|----------------|-------------------|-------------------|------------|---------------|-----------|-------------------------|-------------|------------------|---------------|-----------------------------|--|
|                 | Screening tests                                                     |      |      |      | Follow-up COLs | Surveillance COLs | COLs for symptoms | Total COLs | Complications | CRC cases | CRC deaths <sup>a</sup> | LY with CRC | LYG <sup>b</sup> | CRC incidence | CRC mortality               |  |
|                 | Stool tests                                                         | SIGs | CTCs | COLs |                |                   |                   |            |               |           |                         |             |                  |               |                             |  |
| No screening    | 0                                                                   | 0    | 0    | 0    | 0              | 0                 | 72                | 72         | 2             | 728       | 27                      | 610         | 0                | 0             | 0                           |  |
| HSgFOBT 45-75 y |                                                                     |      |      |      |                |                   |                   |            |               |           |                         |             |                  |               |                             |  |
| 1 y             | 15,706                                                              | 0    | 0    | 0    | 1,322          | 1,253             | 11                | 2,586      | 11            | 16        | 4                       | 190         | 265              | 78            | 85                          |  |
| 2 y             | 10,412                                                              | 0    | 0    | 0    | 908            | 970               | 17                | 1,895      | 10            | 24        | 7                       | 278         | 233              | 66            | 75                          |  |
| 3 y             | 7,792                                                               | 0    | 0    | 0    | 695            | 791               | 24                | 1,510      | 8             | 31        | 9                       | 338         | 202              | 56            | 65                          |  |
| HSgFOBT 45-80 y |                                                                     |      |      |      |                |                   |                   |            |               |           |                         |             |                  |               |                             |  |
| 1 y             | 17,036                                                              | 0    | 0    | 0    | 1,435          | 1,283             | 8                 | 2,726      | 13            | 14        | 3                       | 185         | 270              | 81            | 88                          |  |
| 2 y             | 11,148                                                              | 0    | 0    | 0    | 974            | 994               | 15                | 1,983      | 11            | 22        | 6                       | 275         | 238              | 69            | 78                          |  |
| 3 y             | 8,417                                                               | 0    | 0    | 0    | 753            | 814               | 21                | 1,588      | 9             | 29        | 8                       | 334         | 208              | 59            | 69                          |  |
| HSgFOBT 45-85 y |                                                                     |      |      |      |                |                   |                   |            |               |           |                         |             |                  |               |                             |  |
| 1 y             | 17,991                                                              | 0    | 0    | 0    | 1,517          | 1,300             | 6                 | 2,823      | 14            | 13        | 3                       | 184         | 273              | 82            | 90                          |  |
| 2 y             | 11,945                                                              | 0    | 0    | 0    | 1,048          | 1,015             | 12                | 2,075      | 12            | 21        | 5                       | 274         | 242              | 71            | 81                          |  |
| 3 y             | 9,012                                                               | 0    | 0    | 0    | 811            | 834               | 18                | 1,663      | 10            | 28        | 7                       | 334         | 214              | 61            | 72                          |  |
| HSgFOBT 50-75 y |                                                                     |      |      |      |                |                   |                   |            |               |           |                         |             |                  |               |                             |  |
| 1 y             | 13,026                                                              | 0    | 0    | 0    | 1,121          | 1,120             | 12                | 2,253      | 11            | 18        | 5                       | 237         | 247              | 75            | 82                          |  |
| 2 y             | 8,448                                                               | 0    | 0    | 0    | 755            | 851               | 21                | 1,626      | 9             | 28        | 8                       | 322         | 212              | 61            | 70                          |  |
| 3 y             | 6,498                                                               | 0    | 0    | 0    | 594            | 696               | 27                | 1,317      | 8             | 34        | 10                      | 374         | 183              | 53            | 61                          |  |
| HSgFOBT 50-80 y |                                                                     |      |      |      |                |                   |                   |            |               |           |                         |             |                  |               |                             |  |
| 1 y             | 14,364                                                              | 0    | 0    | 0    | 1,234          | 1,152             | 10                | 2,395      | 12            | 16        | 4                       | 231         | 252              | 77            | 85                          |  |
| 2 y             | 9,554                                                               | 0    | 0    | 0    | 857            | 890               | 16                | 1,763      | 10            | 25        | 6                       | 316         | 221              | 66            | 76                          |  |
| 3 y             | 7,184                                                               | 0    | 0    | 0    | 661            | 728               | 23                | 1,412      | 9             | 32        | 9                       | 371         | 192              | 56            | 66                          |  |
| HSgFOBT 50-85 y |                                                                     |      |      |      |                |                   |                   |            |               |           |                         |             |                  |               |                             |  |
| 1 y             | 15,321                                                              | 0    | 0    | 0    | 1,316          | 1,169             | 8                 | 2,493      | 14            | 15        | 3                       | 230         | 255              | 79            | 87                          |  |
| 2 y             | 10,089                                                              | 0    | 0    | 0    | 906            | 904               | 14                | 1,824      | 11            | 24        | 6                       | 316         | 223              | 67            | 78                          |  |
| 3 y             | 7,643                                                               | 0    | 0    | 0    | 704            | 741               | 21                | 1,466      | 10            | 31        | 8                       | 371         | 195              | 57            | 69                          |  |
| HSgFOBT 55-75 y |                                                                     |      |      |      |                |                   |                   |            |               |           |                         |             |                  |               |                             |  |
| 1 y             | 10,467                                                              | 0    | 0    | 0    | 927            | 957               | 16                | 1,899      | 11            | 22        | 6                       | 298         | 219              | 69            | 77                          |  |
| 2 y             | 6,959                                                               | 0    | 0    | 0    | 643            | 727               | 23                | 1,394      | 9             | 31        | 9                       | 374         | 187              | 57            | 66                          |  |
| 3 y             | 5,053                                                               | 0    | 0    | 0    | 477            | 574               | 31                | 1,082      | 7             | 39        | 12                      | 423         | 156              | 46            | 55                          |  |
| HSgFOBT 55-80 y |                                                                     |      |      |      |                |                   |                   |            |               |           |                         |             |                  |               |                             |  |
| 1 y             | 11,806                                                              | 0    | 0    | 0    | 1,041          | 989               | 13                | 2,043      | 12            | 20        | 5                       | 292         | 224              | 72            | 81                          |  |
| 2 y             | 7,706                                                               | 0    | 0    | 0    | 712            | 755               | 20                | 1,487      | 10            | 29        | 8                       | 370         | 194              | 59            | 70                          |  |
| 3 y             | 5,932                                                               | 0    | 0    | 0    | 563            | 615               | 26                | 1,204      | 9             | 36        | 10                      | 416         | 167              | 51            | 61                          |  |
| HSgFOBT 55-85 y |                                                                     |      |      |      |                |                   |                   |            |               |           |                         |             |                  |               |                             |  |
| 1 y             | 12,765                                                              | 0    | 0    | 0    | 1,124          | 1,008             | 11                | 2,143      | 13            | 19        | 5                       | 291         | 227              | 73            | 83                          |  |
| 2 y             | 8,513                                                               | 0    | 0    | 0    | 787            | 777               | 17                | 1,581      | 11            | 28        | 7                       | 370         | 198              | 61            | 73                          |  |
| 3 y             | 6,429                                                               | 0    | 0    | 0    | 613            | 633               | 23                | 1,269      | 10            | 34        | 10                      | 415         | 171              | 52            | 64                          |  |

COL indicates colonoscopy; CRC, colorectal cancer; CRC-SPIN, CRC Simulated Population Model for Incidence and Natural History; CTC, computed tomographic colonography; HSgFOBT, high-sensitivity guaiac-based fecal occult blood test; LY, life-years; LYG, LY gained compared with no screening; SIG, flexible sigmoidoscopy.

<sup>a</sup> Including deaths from complications of screening.

<sup>b</sup> Compared with no screening.

**eTable 5a.** Outcomes with FIT screening strategies that vary by the ages to begin and end screening and screening interval: **SimCRC**.

| Strategy     | Outcomes per 1,000 persons free of diagnosed cancer at age 40 years |             |      |      |                |                   |                   |            |               |           |                         |             |                  |               | Reductions <sup>b</sup> (%) |      |
|--------------|---------------------------------------------------------------------|-------------|------|------|----------------|-------------------|-------------------|------------|---------------|-----------|-------------------------|-------------|------------------|---------------|-----------------------------|------|
|              | Screening tests                                                     |             |      |      | Follow-up COLs | Surveillance COLs | COLs for symptoms | Total COLs | Complications | CRC cases | CRC deaths <sup>a</sup> | LY with CRC | LYG <sup>b</sup> | CRC incidence | CRC mortality               |      |
|              | Modality, age to begin-end Screening interval                       | Stool tests | SIGs | CTCs |                |                   |                   |            |               |           |                         |             |                  |               |                             | COLs |
| No screening | 0                                                                   | 0           | 0    | 0    | 0              | 0                 | 70                | 70         | 2             | 70        | 28                      | 608         | 0                | 0             | 0                           |      |
| FIT 45-75 y  |                                                                     |             |      |      |                |                   |                   |            |               |           |                         |             |                  |               |                             |      |
| 1 y          | 19,196                                                              | 0           | 0    | 0    | 898            | 1,073             | 8                 | 1,979      | 10            | 20        | 4                       | 311         | 287              | 72            | 85                          |      |
| 2 y          | 11,580                                                              | 0           | 0    | 0    | 591            | 797               | 12                | 1,401      | 8             | 29        | 6                       | 429         | 262              | 58            | 77                          |      |
| 3 y          | 8,387                                                               | 0           | 0    | 0    | 452            | 640               | 16                | 1,108      | 7             | 36        | 9                       | 493         | 236              | 49            | 69                          |      |
| FIT 45-80 y  |                                                                     |             |      |      |                |                   |                   |            |               |           |                         |             |                  |               |                             |      |
| 1 y          | 20,838                                                              | 0           | 0    | 0    | 982            | 1,109             | 5                 | 2,096      | 11            | 18        | 3                       | 312         | 292              | 74            | 89                          |      |
| 2 y          | 12,407                                                              | 0           | 0    | 0    | 641            | 825               | 9                 | 1,475      | 9             | 28        | 5                       | 434         | 268              | 60            | 81                          |      |
| 3 y          | 8,963                                                               | 0           | 0    | 0    | 490            | 661               | 13                | 1,164      | 7             | 35        | 8                       | 500         | 242              | 50            | 73                          |      |
| FIT 45-85 y  |                                                                     |             |      |      |                |                   |                   |            |               |           |                         |             |                  |               |                             |      |
| 1 y          | 21,998                                                              | 0           | 0    | 0    | 1,042          | 1,128             | 4                 | 2,174      | 12            | 18        | 3                       | 315         | 294              | 74            | 90                          |      |
| 2 y          | 13,293                                                              | 0           | 0    | 0    | 696            | 848               | 6                 | 1,550      | 10            | 28        | 5                       | 441         | 271              | 60            | 83                          |      |
| 3 y          | 9,631                                                               | 0           | 0    | 0    | 537            | 682               | 9                 | 1,229      | 9             | 35        | 7                       | 510         | 246              | 50            | 76                          |      |
| FIT 50-75 y  |                                                                     |             |      |      |                |                   |                   |            |               |           |                         |             |                  |               |                             |      |
| 1 y          | 15,778                                                              | 0           | 0    | 0    | 770            | 959               | 10                | 1,739      | 10            | 23        | 5                       | 367         | 260              | 67            | 81                          |      |
| 2 y          | 9,326                                                               | 0           | 0    | 0    | 500            | 700               | 15                | 1,215      | 7             | 33        | 8                       | 470         | 234              | 53            | 72                          |      |
| 3 y          | 6,887                                                               | 0           | 0    | 0    | 391            | 562               | 19                | 971        | 6             | 39        | 10                      | 527         | 212              | 44            | 65                          |      |
| FIT 50-80 y  |                                                                     |             |      |      |                |                   |                   |            |               |           |                         |             |                  |               |                             |      |
| 1 y          | 17,426                                                              | 0           | 0    | 0    | 855            | 996               | 7                 | 1,858      | 11            | 22        | 4                       | 368         | 265              | 69            | 85                          |      |
| 2 y          | 10,572                                                              | 0           | 0    | 0    | 576            | 741               | 10                | 1,327      | 9             | 31        | 6                       | 478         | 243              | 56            | 78                          |      |
| 3 y          | 7,694                                                               | 0           | 0    | 0    | 446            | 595               | 14                | 1,055      | 8             | 37        | 8                       | 538         | 220              | 46            | 70                          |      |
| FIT 50-85 y  |                                                                     |             |      |      |                |                   |                   |            |               |           |                         |             |                  |               |                             |      |
| 1 y          | 18,589                                                              | 0           | 0    | 0    | 915            | 1,016             | 5                 | 1,937      | 12            | 21        | 4                       | 370         | 267              | 70            | 86                          |      |
| 2 y          | 11,165                                                              | 0           | 0    | 0    | 613            | 757               | 8                 | 1,377      | 10            | 31        | 6                       | 482         | 245              | 56            | 79                          |      |
| 3 y          | 8,111                                                               | 0           | 0    | 0    | 475            | 608               | 11                | 1,095      | 8             | 37        | 8                       | 544         | 223              | 46            | 72                          |      |
| FIT 55-75 y  |                                                                     |             |      |      |                |                   |                   |            |               |           |                         |             |                  |               |                             |      |
| 1 y          | 12,502                                                              | 0           | 0    | 0    | 645            | 820               | 13                | 1,478      | 9             | 28        | 7                       | 434         | 226              | 60            | 76                          |      |
| 2 y          | 7,616                                                               | 0           | 0    | 0    | 436            | 601               | 17                | 1,053      | 7             | 37        | 9                       | 524         | 204              | 48            | 68                          |      |
| 3 y          | 5,306                                                               | 0           | 0    | 0    | 320            | 464               | 24                | 807        | 6             | 43        | 12                      | 564         | 178              | 38            | 58                          |      |
| FIT 55-80 y  |                                                                     |             |      |      |                |                   |                   |            |               |           |                         |             |                  |               |                             |      |
| 1 y          | 14,163                                                              | 0           | 0    | 0    | 731            | 858               | 10                | 1,599      | 11            | 26        | 6                       | 435         | 231              | 62            | 79                          |      |
| 2 y          | 8,455                                                               | 0           | 0    | 0    | 487            | 630               | 14                | 1,131      | 8             | 35        | 8                       | 530         | 210              | 49            | 72                          |      |
| 3 y          | 6,258                                                               | 0           | 0    | 0    | 385            | 504               | 17                | 907        | 7             | 42        | 10                      | 577         | 190              | 41            | 65                          |      |
| FIT 55-85 y  |                                                                     |             |      |      |                |                   |                   |            |               |           |                         |             |                  |               |                             |      |
| 1 y          | 15,332                                                              | 0           | 0    | 0    | 792            | 879               | 8                 | 1,679      | 12            | 26        | 5                       | 437         | 233              | 63            | 81                          |      |
| 2 y          | 9,350                                                               | 0           | 0    | 0    | 544            | 654               | 11                | 1,208      | 10            | 35        | 7                       | 537         | 214              | 50            | 74                          |      |
| 3 y          | 6,837                                                               | 0           | 0    | 0    | 427            | 523               | 14                | 965        | 8             | 41        | 9                       | 586         | 193              | 41            | 67                          |      |

COL indicates colonoscopy; CRC, colorectal cancer; CTC, computed tomographic colonography; FIT, fecal immunochemical test with a positivity cutoff of  $\geq 100$  ng of hemoglobin (Hb) per mL of buffer ( $\geq 20$   $\mu$ g Hb/g of feces); LY, life-years; LYG, LY gained compared with no screening; SIG, flexible sigmoidoscopy; SimCRC, Simulation Model of CRC.

<sup>a</sup> Including deaths from complications of screening.

<sup>b</sup> Compared with no screening.

**eTable 5b.** Outcomes with FIT screening strategies that vary by the ages to begin and end screening and screening interval: **MISCAN**.

| Strategy     | Outcomes per 1,000 persons free of diagnosed cancer at age 40 years |             |      |      |                |                   |                   |            |               |           |                         |             |                  |               | Reductions <sup>b</sup> (%) |      |
|--------------|---------------------------------------------------------------------|-------------|------|------|----------------|-------------------|-------------------|------------|---------------|-----------|-------------------------|-------------|------------------|---------------|-----------------------------|------|
|              | Screening tests                                                     |             |      |      | Follow-up COLs | Surveillance COLs | COLs for symptoms | Total COLs | Complications | CRC cases | CRC deaths <sup>a</sup> | LY with CRC | LYG <sup>b</sup> | CRC incidence | CRC mortality               |      |
|              | Modality, age to begin-end Screening interval                       | Stool tests | SIGs | CTCs |                |                   |                   |            |               |           |                         |             |                  |               |                             | COLs |
| No screening | 0                                                                   | 0           | 0    | 0    | 0              | 0                 | 67                | 67         | 1             | 67        | 28                      | 565         | 0                | 0             | 0                           |      |
| FIT 45-75 y  |                                                                     |             |      |      |                |                   |                   |            |               |           |                         |             |                  |               |                             |      |
| 1 y          | 19,256                                                              | 0           | 0    | 0    | 869            | 1,112             | 14                | 1,995      | 10            | 34        | 7                       | 486         | 247              | 49            | 74                          |      |
| 2 y          | 11,595                                                              | 0           | 0    | 0    | 574            | 830               | 19                | 1,423      | 8             | 42        | 10                      | 571         | 216              | 37            | 65                          |      |
| 3 y          | 8,377                                                               | 0           | 0    | 0    | 440            | 671               | 24                | 1,134      | 7             | 47        | 12                      | 608         | 191              | 30            | 58                          |      |
| FIT 45-80 y  |                                                                     |             |      |      |                |                   |                   |            |               |           |                         |             |                  |               |                             |      |
| 1 y          | 20,955                                                              | 0           | 0    | 0    | 945            | 1,136             | 11                | 2,091      | 11            | 33        | 6                       | 490         | 254              | 51            | 78                          |      |
| 2 y          | 12,438                                                              | 0           | 0    | 0    | 617            | 849               | 16                | 1,482      | 9             | 41        | 9                       | 579         | 222              | 38            | 69                          |      |
| 3 y          | 8,836                                                               | 0           | 0    | 0    | 467            | 683               | 21                | 1,171      | 8             | 46        | 11                      | 616         | 196              | 30            | 61                          |      |
| FIT 45-85 y  |                                                                     |             |      |      |                |                   |                   |            |               |           |                         |             |                  |               |                             |      |
| 1 y          | 22,193                                                              | 0           | 0    | 0    | 999            | 1,148             | 9                 | 2,156      | 12            | 32        | 6                       | 494         | 256              | 51            | 80                          |      |
| 2 y          | 13,363                                                              | 0           | 0    | 0    | 665            | 864               | 13                | 1,542      | 10            | 41        | 8                       | 589         | 226              | 38            | 72                          |      |
| 3 y          | 9,534                                                               | 0           | 0    | 0    | 508            | 699               | 17                | 1,224      | 8             | 47        | 10                      | 629         | 200              | 30            | 65                          |      |
| FIT 50-75 y  |                                                                     |             |      |      |                |                   |                   |            |               |           |                         |             |                  |               |                             |      |
| 1 y          | 15,843                                                              | 0           | 0    | 0    | 745            | 997               | 15                | 1,757      | 10            | 35        | 8                       | 504         | 231              | 47            | 72                          |      |
| 2 y          | 9,342                                                               | 0           | 0    | 0    | 486            | 735               | 21                | 1,243      | 8             | 44        | 11                      | 582         | 200              | 35            | 62                          |      |
| 3 y          | 6,795                                                               | 0           | 0    | 0    | 376            | 593               | 26                | 995        | 7             | 48        | 13                      | 613         | 176              | 28            | 55                          |      |
| FIT 50-80 y  |                                                                     |             |      |      |                |                   |                   |            |               |           |                         |             |                  |               |                             |      |
| 1 y          | 17,552                                                              | 0           | 0    | 0    | 822            | 1,021             | 12                | 1,855      | 11            | 34        | 7                       | 509         | 238              | 49            | 76                          |      |
| 2 y          | 10,613                                                              | 0           | 0    | 0    | 553            | 765               | 16                | 1,334      | 9             | 42        | 9                       | 594         | 210              | 36            | 68                          |      |
| 3 y          | 7,693                                                               | 0           | 0    | 0    | 429            | 620               | 21                | 1,070      | 8             | 47        | 11                      | 630         | 186              | 29            | 61                          |      |
| FIT 50-85 y  |                                                                     |             |      |      |                |                   |                   |            |               |           |                         |             |                  |               |                             |      |
| 1 y          | 18,796                                                              | 0           | 0    | 0    | 877            | 1,034             | 10                | 1,921      | 11            | 34        | 6                       | 512         | 240              | 49            | 78                          |      |
| 2 y          | 11,233                                                              | 0           | 0    | 0    | 585            | 775               | 14                | 1,375      | 9             | 42        | 8                       | 601         | 213              | 36            | 70                          |      |
| 3 y          | 8,032                                                               | 0           | 0    | 0    | 449            | 627               | 19                | 1,096      | 8             | 48        | 10                      | 636         | 188              | 29            | 62                          |      |
| FIT 55-75 y  |                                                                     |             |      |      |                |                   |                   |            |               |           |                         |             |                  |               |                             |      |
| 1 y          | 12,586                                                              | 0           | 0    | 0    | 626            | 847               | 18                | 1,490      | 9             | 38        | 9                       | 531         | 206              | 43            | 68                          |      |
| 2 y          | 7,644                                                               | 0           | 0    | 0    | 424            | 628               | 23                | 1,075      | 8             | 45        | 11                      | 599         | 179              | 32            | 59                          |      |
| 3 y          | 5,250                                                               | 0           | 0    | 0    | 311            | 493               | 29                | 833        | 6             | 50        | 14                      | 621         | 153              | 24            | 50                          |      |
| FIT 55-80 y  |                                                                     |             |      |      |                |                   |                   |            |               |           |                         |             |                  |               |                             |      |
| 1 y          | 14,313                                                              | 0           | 0    | 0    | 704            | 873               | 14                | 1,592      | 10            | 37        | 8                       | 536         | 213              | 45            | 72                          |      |
| 2 y          | 8,501                                                               | 0           | 0    | 0    | 470            | 650               | 19                | 1,139      | 8             | 45        | 10                      | 608         | 186              | 33            | 63                          |      |
| 3 y          | 6,204                                                               | 0           | 0    | 0    | 368            | 525               | 23                | 917        | 7             | 49        | 12                      | 639         | 165              | 26            | 57                          |      |
| FIT 55-85 y  |                                                                     |             |      |      |                |                   |                   |            |               |           |                         |             |                  |               |                             |      |
| 1 y          | 15,566                                                              | 0           | 0    | 0    | 760            | 887               | 12                | 1,659      | 11            | 36        | 7                       | 539         | 215              | 45            | 74                          |      |
| 2 y          | 9,437                                                               | 0           | 0    | 0    | 519            | 666               | 16                | 1,201      | 9             | 45        | 9                       | 617         | 190              | 33            | 66                          |      |
| 3 y          | 6,859                                                               | 0           | 0    | 0    | 408            | 540               | 20                | 967        | 8             | 50        | 11                      | 651         | 169              | 25            | 60                          |      |

COL indicates colonoscopy; CRC, colorectal cancer; CTC, computed tomographic colonography; FIT, fecal immunochemical test with a positivity cutoff of  $\geq 100$  ng of hemoglobin (Hb) per mL of buffer ( $\geq 20$   $\mu$ g Hb/g of feces); LY, life-years; LYG, LY gained compared with no screening; MISCAN, Microsimulation Screening Analysis; SIG, flexible sigmoidoscopy.

<sup>a</sup> Including deaths from complications of screening.

<sup>b</sup> Compared with no screening.

**eTable 5c.** Outcomes with FIT screening strategies that vary by the ages to begin and end screening and screening interval: **CRC-SPIN**.

| Strategy     | Outcomes per 1,000 persons free of diagnosed cancer at age 40 years |             |      |      |                |                   |                   |            |               |           |                         |             |                  |               | Reductions <sup>b</sup> (%) |      |
|--------------|---------------------------------------------------------------------|-------------|------|------|----------------|-------------------|-------------------|------------|---------------|-----------|-------------------------|-------------|------------------|---------------|-----------------------------|------|
|              | Screening tests                                                     |             |      |      | Follow-up COLs | Surveillance COLs | COLs for symptoms | Total COLs | Complications | CRC cases | CRC deaths <sup>a</sup> | LY with CRC | LYG <sup>b</sup> | CRC incidence | CRC mortality               |      |
|              | Modality, age to begin-end Screening interval                       | Stool tests | SIGs | CTCs |                |                   |                   |            |               |           |                         |             |                  |               |                             | COLs |
| No screening | 0                                                                   | 0           | 0    | 0    | 0              | 0                 | 72                | 72         | 2             | 72        | 27                      | 610         | 0                | 0             | 0                           |      |
| FIT 45-75 y  |                                                                     |             |      |      |                |                   |                   |            |               |           |                         |             |                  |               |                             |      |
| 1 y          | 18,733                                                              | 0           | 0    | 0    | 927            | 1,225             | 11                | 2,163      | 11            | 17        | 4                       | 213         | 263              | 76            | 83                          |      |
| 2 y          | 11,439                                                              | 0           | 0    | 0    | 613            | 922               | 19                | 1,554      | 9             | 27        | 7                       | 307         | 228              | 63            | 73                          |      |
| 3 y          | 8,327                                                               | 0           | 0    | 0    | 467            | 743               | 26                | 1,235      | 8             | 34        | 10                      | 364         | 196              | 53            | 63                          |      |
| FIT 45-80 y  |                                                                     |             |      |      |                |                   |                   |            |               |           |                         |             |                  |               |                             |      |
| 1 y          | 20,348                                                              | 0           | 0    | 0    | 1,010          | 1,256             | 8                 | 2,274      | 12            | 15        | 3                       | 209         | 269              | 79            | 87                          |      |
| 2 y          | 12,260                                                              | 0           | 0    | 0    | 661            | 947               | 16                | 1,624      | 10            | 25        | 6                       | 303         | 233              | 65            | 76                          |      |
| 3 y          | 8,907                                                               | 0           | 0    | 0    | 504            | 762               | 23                | 1,289      | 8             | 32        | 9                       | 364         | 203              | 55            | 66                          |      |
| FIT 45-85 y  |                                                                     |             |      |      |                |                   |                   |            |               |           |                         |             |                  |               |                             |      |
| 1 y          | 21,506                                                              | 0           | 0    | 0    | 1,071          | 1,273             | 7                 | 2,351      | 13            | 14        | 3                       | 208         | 271              | 80            | 89                          |      |
| 2 y          | 13,148                                                              | 0           | 0    | 0    | 716            | 968               | 13                | 1,697      | 11            | 23        | 5                       | 304         | 239              | 67            | 80                          |      |
| 3 y          | 9,577                                                               | 0           | 0    | 0    | 549            | 783               | 19                | 1,351      | 9             | 31        | 8                       | 363         | 208              | 57            | 70                          |      |
| FIT 50-75 y  |                                                                     |             |      |      |                |                   |                   |            |               |           |                         |             |                  |               |                             |      |
| 1 y          | 15,444                                                              | 0           | 0    | 0    | 798            | 1,088             | 13                | 1,899      | 11            | 20        | 5                       | 259         | 244              | 72            | 81                          |      |
| 2 y          | 9,241                                                               | 0           | 0    | 0    | 519            | 805               | 22                | 1,346      | 9             | 30        | 8                       | 348         | 207              | 58            | 68                          |      |
| 3 y          | 6,857                                                               | 0           | 0    | 0    | 404            | 649               | 28                | 1,081      | 7             | 37        | 11                      | 399         | 178              | 49            | 59                          |      |
| FIT 50-80 y  |                                                                     |             |      |      |                |                   |                   |            |               |           |                         |             |                  |               |                             |      |
| 1 y          | 17,062                                                              | 0           | 0    | 0    | 883            | 1,120             | 10                | 2,013      | 12            | 18        | 4                       | 254         | 250              | 75            | 85                          |      |
| 2 y          | 10,476                                                              | 0           | 0    | 0    | 594            | 843               | 17                | 1,454      | 10            | 27        | 7                       | 344         | 218              | 62            | 74                          |      |
| 3 y          | 7,660                                                               | 0           | 0    | 0    | 458            | 681               | 24                | 1,163      | 8             | 34        | 10                      | 396         | 187              | 53            | 64                          |      |
| FIT 50-85 y  |                                                                     |             |      |      |                |                   |                   |            |               |           |                         |             |                  |               |                             |      |
| 1 y          | 18,224                                                              | 0           | 0    | 0    | 945            | 1,138             | 8                 | 2,091      | 13            | 17        | 4                       | 254         | 253              | 77            | 87                          |      |
| 2 y          | 11,071                                                              | 0           | 0    | 0    | 631            | 858               | 15                | 1,504      | 11            | 26        | 6                       | 344         | 220              | 64            | 76                          |      |
| 3 y          | 8,084                                                               | 0           | 0    | 0    | 486            | 694               | 22                | 1,201      | 9             | 33        | 9                       | 396         | 191              | 54            | 67                          |      |
| FIT 55-75 y  |                                                                     |             |      |      |                |                   |                   |            |               |           |                         |             |                  |               |                             |      |
| 1 y          | 12,290                                                              | 0           | 0    | 0    | 672            | 923               | 16                | 1,611      | 10            | 24        | 6                       | 318         | 217              | 67            | 76                          |      |
| 2 y          | 7,575                                                               | 0           | 0    | 0    | 453            | 683               | 24                | 1,160      | 8             | 34        | 10                      | 398         | 183              | 53            | 64                          |      |
| 3 y          | 5,301                                                               | 0           | 0    | 0    | 330            | 532               | 33                | 895        | 7             | 41        | 13                      | 444         | 152              | 43            | 52                          |      |
| FIT 55-80 y  |                                                                     |             |      |      |                |                   |                   |            |               |           |                         |             |                  |               |                             |      |
| 1 y          | 13,929                                                              | 0           | 0    | 0    | 759            | 957               | 13                | 1,729      | 12            | 22        | 5                       | 313         | 224              | 70            | 80                          |      |
| 2 y          | 8,410                                                               | 0           | 0    | 0    | 504            | 712               | 21                | 1,237      | 9             | 31        | 8                       | 393         | 190              | 56            | 68                          |      |
| 3 y          | 6,254                                                               | 0           | 0    | 0    | 395            | 573               | 27                | 995        | 8             | 38        | 11                      | 438         | 164              | 47            | 59                          |      |
| FIT 55-85 y  |                                                                     |             |      |      |                |                   |                   |            |               |           |                         |             |                  |               |                             |      |
| 1 y          | 15,093                                                              | 0           | 0    | 0    | 821            | 977               | 11                | 1,809      | 13            | 21        | 5                       | 311         | 226              | 71            | 82                          |      |
| 2 y          | 9,309                                                               | 0           | 0    | 0    | 561            | 734               | 18                | 1,313      | 10            | 30        | 7                       | 393         | 196              | 58            | 72                          |      |
| 3 y          | 6,836                                                               | 0           | 0    | 0    | 436            | 591               | 24                | 1,051      | 9             | 36        | 10                      | 437         | 168              | 49            | 63                          |      |

COL indicates colonoscopy; CRC, colorectal cancer; CRC-SPIN, CRC Simulated Population Model for Incidence and Natural History; CTC, computed tomographic colonography; FIT, fecal immunochemical test with a positivity cutoff of  $\geq 100$  ng of hemoglobin (Hb) per mL of buffer ( $\geq 20$   $\mu$ g Hb/g of feces); LY, life-years; LYG, LY gained compared with no screening; SIG, flexible sigmoidoscopy.

<sup>a</sup> Including deaths from complications of screening.

<sup>b</sup> Compared with no screening.

**eTable 6a.** Outcomes with FIT-DNA screening strategies that vary by the ages to begin and end screening and screening interval: **SimCRC**.

| Strategy        | Outcomes per 1,000 persons free of diagnosed cancer at age 40 years |      |      |      |                |                   |                   |            |               |           |                         |             |                  |               | Reductions <sup>b</sup> (%) |  |
|-----------------|---------------------------------------------------------------------|------|------|------|----------------|-------------------|-------------------|------------|---------------|-----------|-------------------------|-------------|------------------|---------------|-----------------------------|--|
|                 | Screening tests                                                     |      |      |      | Follow-up COLs | Surveillance COLs | COLs for symptoms | Total COLs | Complications | CRC cases | CRC deaths <sup>a</sup> | LY with CRC | LYG <sup>b</sup> | CRC incidence | CRC mortality               |  |
|                 | Stool tests                                                         | SIGs | CTCs | COLs |                |                   |                   |            |               |           |                         |             |                  |               |                             |  |
| No screening    | 0                                                                   | 0    | 0    | 0    | 0              | 0                 | 70                | 70         | 2             | 70        | 28                      | 608         | 0                | 0             | 0                           |  |
| FIT-DNA 45-75 y |                                                                     |      |      |      |                |                   |                   |            |               |           |                         |             |                  |               |                             |  |
| 1 y             | 13,372                                                              | 0    | 0    | 0    | 1,576          | 1,397             | 6                 | 2,978      | 12            | 14        | 3                       | 218         | 298              | 81            | 89                          |  |
| 3 y             | 7,158                                                               | 0    | 0    | 0    | 906            | 1,012             | 10                | 1,928      | 9             | 23        | 5                       | 346         | 274              | 67            | 81                          |  |
| 5 y             | 5,233                                                               | 0    | 0    | 0    | 692            | 835               | 13                | 1,539      | 8             | 30        | 7                       | 420         | 247              | 57            | 74                          |  |
| FIT-DNA 45-80 y |                                                                     |      |      |      |                |                   |                   |            |               |           |                         |             |                  |               |                             |  |
| 1 y             | 14,415                                                              | 0    | 0    | 0    | 1,703          | 1,432             | 4                 | 3,139      | 13            | 12        | 2                       | 216         | 301              | 82            | 91                          |  |
| 3 y             | 7,746                                                               | 0    | 0    | 0    | 986            | 1,045             | 6                 | 2,037      | 11            | 22        | 4                       | 348         | 280              | 69            | 85                          |  |
| 5 y             | 5,621                                                               | 0    | 0    | 0    | 751            | 860               | 9                 | 1,621      | 10            | 29        | 6                       | 426         | 252              | 58            | 78                          |  |
| FIT-DNA 45-85 y |                                                                     |      |      |      |                |                   |                   |            |               |           |                         |             |                  |               |                             |  |
| 1 y             | 15,145                                                              | 0    | 0    | 0    | 1,791          | 1,451             | 3                 | 3,245      | 15            | 12        | 2                       | 216         | 301              | 83            | 92                          |  |
| 3 y             | 8,217                                                               | 0    | 0    | 0    | 1,052          | 1,067             | 4                 | 2,124      | 12            | 21        | 4                       | 352         | 282              | 70            | 87                          |  |
| 5 y             | 5,882                                                               | 0    | 0    | 0    | 792            | 874               | 7                 | 1,674      | 11            | 29        | 6                       | 431         | 253              | 58            | 79                          |  |
| FIT-DNA 50-75 y |                                                                     |      |      |      |                |                   |                   |            |               |           |                         |             |                  |               |                             |  |
| 1 y             | 11,041                                                              | 0    | 0    | 0    | 1,332          | 1,261             | 8                 | 2,601      | 12            | 17        | 4                       | 277         | 271              | 76            | 85                          |  |
| 3 y             | 5,990                                                               | 0    | 0    | 0    | 783            | 907               | 11                | 1,701      | 9             | 26        | 6                       | 397         | 250              | 63            | 78                          |  |
| 5 y             | 4,391                                                               | 0    | 0    | 0    | 601            | 748               | 15                | 1,364      | 8             | 33        | 8                       | 461         | 224              | 53            | 71                          |  |
| FIT-DNA 50-80 y |                                                                     |      |      |      |                |                   |                   |            |               |           |                         |             |                  |               |                             |  |
| 1 y             | 12,096                                                              | 0    | 0    | 0    | 1,460          | 1,297             | 6                 | 2,763      | 13            | 15        | 3                       | 275         | 274              | 78            | 88                          |  |
| 3 y             | 6,543                                                               | 0    | 0    | 0    | 861            | 941               | 8                 | 1,809      | 10            | 25        | 5                       | 399         | 255              | 65            | 81                          |  |
| 5 y             | 4,781                                                               | 0    | 0    | 0    | 662            | 774               | 11                | 1,447      | 9             | 32        | 7                       | 467         | 229              | 54            | 74                          |  |
| FIT-DNA 50-85 y |                                                                     |      |      |      |                |                   |                   |            |               |           |                         |             |                  |               |                             |  |
| 1 y             | 12,826                                                              | 0    | 0    | 0    | 1,549          | 1,316             | 5                 | 2,870      | 14            | 15        | 3                       | 275         | 275              | 79            | 88                          |  |
| 3 y             | 6,961                                                               | 0    | 0    | 0    | 918            | 959               | 6                 | 1,884      | 11            | 24        | 5                       | 403         | 257              | 65            | 83                          |  |
| 5 y             | 5,043                                                               | 0    | 0    | 0    | 703            | 788               | 9                 | 1,500      | 10            | 32        | 7                       | 472         | 230              | 54            | 75                          |  |
| FIT-DNA 55-75 y |                                                                     |      |      |      |                |                   |                   |            |               |           |                         |             |                  |               |                             |  |
| 1 y             | 8,846                                                               | 0    | 0    | 0    | 1,101          | 1,094             | 11                | 2,206      | 11            | 21        | 6                       | 349         | 237              | 69            | 80                          |  |
| 3 y             | 4,668                                                               | 0    | 0    | 0    | 636            | 764               | 15                | 1,415      | 9             | 31        | 8                       | 456         | 214              | 55            | 71                          |  |
| 5 y             | 3,576                                                               | 0    | 0    | 0    | 512            | 642               | 18                | 1,171      | 8             | 37        | 10                      | 508         | 194              | 47            | 65                          |  |
| FIT-DNA 55-80 y |                                                                     |      |      |      |                |                   |                   |            |               |           |                         |             |                  |               |                             |  |
| 1 y             | 9,880                                                               | 0    | 0    | 0    | 1,228          | 1,131             | 9                 | 2,367      | 13            | 20        | 5                       | 347         | 240              | 71            | 82                          |  |
| 3 y             | 5,410                                                               | 0    | 0    | 0    | 740            | 810               | 11                | 1,561      | 10            | 29        | 7                       | 459         | 222              | 58            | 76                          |  |
| 5 y             | 3,970                                                               | 0    | 0    | 0    | 573            | 669               | 14                | 1,255      | 9             | 36        | 9                       | 515         | 199              | 49            | 69                          |  |
| FIT-DNA 55-85 y |                                                                     |      |      |      |                |                   |                   |            |               |           |                         |             |                  |               |                             |  |
| 1 y             | 10,618                                                              | 0    | 0    | 0    | 1,317          | 1,150             | 8                 | 2,475      | 14            | 20        | 5                       | 348         | 241              | 72            | 83                          |  |
| 3 y             | 5,801                                                               | 0    | 0    | 0    | 795            | 829               | 9                 | 1,634      | 11            | 29        | 6                       | 463         | 223              | 59            | 77                          |  |
| 5 y             | 4,233                                                               | 0    | 0    | 0    | 614            | 683               | 12                | 1,310      | 10            | 36        | 8                       | 520         | 200              | 48            | 70                          |  |

COL indicates colonoscopy; CRC, colorectal cancer; CTC, computed tomographic colonography; FIT-DNA, fecal immunochemical test with a DNA stool test; LY, life-years; LYG, LY gained compared with no screening; SIG, flexible sigmoidoscopy; SimCRC, Simulation Model of CRC.

<sup>a</sup> Including deaths from complications of screening.

<sup>b</sup> Compared with no screening.

**eTable 6b.** Outcomes with FIT-DNA screening strategies that vary by the ages to begin and end screening and screening interval: **MISCAN**.

| Strategy        | Outcomes per 1,000 persons free of diagnosed cancer at age 40 years |      |      |      |                |                   |                   |            |               |           |                         |             |                  |               | Reductions <sup>b</sup> (%) |  |
|-----------------|---------------------------------------------------------------------|------|------|------|----------------|-------------------|-------------------|------------|---------------|-----------|-------------------------|-------------|------------------|---------------|-----------------------------|--|
|                 | Screening tests                                                     |      |      |      | Follow-up COLs | Surveillance COLs | COLs for symptoms | Total COLs | Complications | CRC cases | CRC deaths <sup>a</sup> | LY with CRC | LYG <sup>b</sup> | CRC incidence | CRC mortality               |  |
|                 | Stool tests                                                         | SIGs | CTCs | COLs |                |                   |                   |            |               |           |                         |             |                  |               |                             |  |
| No screening    | 0                                                                   | 0    | 0    | 0    | 0              | 0                 | 67                | 67         | 1             | 67        | 28                      | 565         | 0                | 0             | 0                           |  |
| FIT-DNA 45-75 y |                                                                     |      |      |      |                |                   |                   |            |               |           |                         |             |                  |               |                             |  |
| 1 y             | 13,328                                                              | 0    | 0    | 0    | 1,531          | 1,501             | 11                | 3,044      | 12            | 27        | 6                       | 390         | 261              | 59            | 79                          |  |
| 3 y             | 7,086                                                               | 0    | 0    | 0    | 878            | 1,071             | 16                | 1,965      | 10            | 36        | 8                       | 505         | 231              | 45            | 71                          |  |
| 5 y             | 5,219                                                               | 0    | 0    | 0    | 674            | 881               | 21                | 1,576      | 9             | 42        | 10                      | 557         | 206              | 37            | 64                          |  |
| FIT-DNA 45-80 y |                                                                     |      |      |      |                |                   |                   |            |               |           |                         |             |                  |               |                             |  |
| 1 y             | 14,398                                                              | 0    | 0    | 0    | 1,651          | 1,523             | 9                 | 3,183      | 13            | 26        | 5                       | 390         | 265              | 61            | 82                          |  |
| 3 y             | 7,445                                                               | 0    | 0    | 0    | 922            | 1,085             | 14                | 2,022      | 10            | 36        | 8                       | 509         | 235              | 46            | 73                          |  |
| 5 y             | 5,612                                                               | 0    | 0    | 0    | 727            | 900               | 17                | 1,644      | 10            | 41        | 9                       | 566         | 211              | 38            | 67                          |  |
| FIT-DNA 45-85 y |                                                                     |      |      |      |                |                   |                   |            |               |           |                         |             |                  |               |                             |  |
| 1 y             | 15,178                                                              | 0    | 0    | 0    | 1,738          | 1,534             | 8                 | 3,280      | 14            | 26        | 5                       | 391         | 267              | 62            | 83                          |  |
| 3 y             | 7,990                                                               | 0    | 0    | 0    | 990            | 1,101             | 12                | 2,103      | 11            | 35        | 7                       | 515         | 238              | 47            | 75                          |  |
| 5 y             | 5,883                                                               | 0    | 0    | 0    | 763            | 909               | 16                | 1,688      | 10            | 42        | 9                       | 572         | 212              | 38            | 69                          |  |
| FIT-DNA 50-75 y |                                                                     |      |      |      |                |                   |                   |            |               |           |                         |             |                  |               |                             |  |
| 1 y             | 11,025                                                              | 0    | 0    | 0    | 1,295          | 1,355             | 12                | 2,662      | 12            | 28        | 6                       | 412         | 246              | 57            | 77                          |  |
| 3 y             | 5,779                                                               | 0    | 0    | 0    | 740            | 956               | 18                | 1,714      | 9             | 38        | 9                       | 519         | 215              | 43            | 67                          |  |
| 5 y             | 4,380                                                               | 0    | 0    | 0    | 586            | 794               | 22                | 1,402      | 9             | 43        | 11                      | 569         | 193              | 35            | 62                          |  |
| FIT-DNA 50-80 y |                                                                     |      |      |      |                |                   |                   |            |               |           |                         |             |                  |               |                             |  |
| 1 y             | 12,108                                                              | 0    | 0    | 0    | 1,417          | 1,377             | 10                | 2,804      | 13            | 27        | 6                       | 413         | 250              | 59            | 80                          |  |
| 3 y             | 6,481                                                               | 0    | 0    | 0    | 828            | 985               | 14                | 1,828      | 11            | 37        | 8                       | 527         | 223              | 45            | 72                          |  |
| 5 y             | 4,776                                                               | 0    | 0    | 0    | 640            | 813               | 19                | 1,472      | 9             | 43        | 10                      | 579         | 198              | 36            | 65                          |  |
| FIT-DNA 50-85 y |                                                                     |      |      |      |                |                   |                   |            |               |           |                         |             |                  |               |                             |  |
| 1 y             | 12,888                                                              | 0    | 0    | 0    | 1,504          | 1,388             | 9                 | 2,901      | 14            | 27        | 5                       | 414         | 252              | 59            | 81                          |  |
| 3 y             | 6,745                                                               | 0    | 0    | 0    | 861            | 993               | 13                | 1,867      | 11            | 37        | 7                       | 530         | 224              | 45            | 73                          |  |
| 5 y             | 5,048                                                               | 0    | 0    | 0    | 677            | 822               | 17                | 1,516      | 10            | 43        | 9                       | 584         | 200              | 36            | 67                          |  |
| FIT-DNA 55-75 y |                                                                     |      |      |      |                |                   |                   |            |               |           |                         |             |                  |               |                             |  |
| 1 y             | 8,874                                                               | 0    | 0    | 0    | 1,076          | 1,162             | 14                | 2,252      | 12            | 31        | 7                       | 447         | 221              | 53            | 73                          |  |
| 3 y             | 4,509                                                               | 0    | 0    | 0    | 604            | 806               | 21                | 1,431      | 9             | 41        | 10                      | 542         | 190              | 39            | 63                          |  |
| 5 y             | 3,574                                                               | 0    | 0    | 0    | 500            | 679               | 24                | 1,203      | 8             | 45        | 12                      | 585         | 172              | 32            | 58                          |  |
| FIT-DNA 55-80 y |                                                                     |      |      |      |                |                   |                   |            |               |           |                         |             |                  |               |                             |  |
| 1 y             | 9,943                                                               | 0    | 0    | 0    | 1,196          | 1,186             | 12                | 2,394      | 13            | 30        | 7                       | 447         | 226              | 55            | 76                          |  |
| 3 y             | 5,260                                                               | 0    | 0    | 0    | 699            | 841               | 17                | 1,557      | 10            | 39        | 9                       | 550         | 199              | 41            | 68                          |  |
| 5 y             | 3,974                                                               | 0    | 0    | 0    | 555            | 699               | 20                | 1,275      | 9             | 45        | 11                      | 594         | 178              | 33            | 62                          |  |
| FIT-DNA 55-85 y |                                                                     |      |      |      |                |                   |                   |            |               |           |                         |             |                  |               |                             |  |
| 1 y             | 10,733                                                              | 0    | 0    | 0    | 1,285          | 1,197             | 11                | 2,493      | 14            | 30        | 6                       | 448         | 227              | 56            | 77                          |  |
| 3 y             | 5,771                                                               | 0    | 0    | 0    | 763            | 856               | 15                | 1,634      | 11            | 39        | 8                       | 556         | 202              | 41            | 70                          |  |
| 5 y             | 4,248                                                               | 0    | 0    | 0    | 593            | 709               | 19                | 1,320      | 10            | 45        | 10                      | 600         | 179              | 33            | 63                          |  |

COL indicates colonoscopy; CRC, colorectal cancer; CTC, computed tomographic colonography; FIT-DNA, fecal immunochemical test with a DNA stool test; LY, life-years; LYG, LY gained compared with no screening; MISCAN, Microsimulation Screening Analysis; SIG, flexible sigmoidoscopy.

<sup>a</sup> Including deaths from complications of screening.

<sup>b</sup> Compared with no screening.

**eTable 6c.** Outcomes with FIT-DNA screening strategies that vary by the ages to begin and end screening and screening interval: **CRC-SPIN**.

| Strategy        | Outcomes per 1,000 persons free of diagnosed cancer at age 40 years |      |      |      |                |                   |                   |            |               |           |                         |             |                  |               | Reductions <sup>b</sup> (%) |  |
|-----------------|---------------------------------------------------------------------|------|------|------|----------------|-------------------|-------------------|------------|---------------|-----------|-------------------------|-------------|------------------|---------------|-----------------------------|--|
|                 | Screening tests                                                     |      |      |      | Follow-up COLs | Surveillance COLs | COLs for symptoms | Total COLs | Complications | CRC cases | CRC deaths <sup>a</sup> | LY with CRC | LYG <sup>b</sup> | CRC incidence | CRC mortality               |  |
|                 | Stool tests                                                         | SIGs | CTCs | COLs |                |                   |                   |            |               |           |                         |             |                  |               |                             |  |
| No screening    | 0                                                                   | 0    | 0    | 0    | 0              | 0                 | 72                | 72         | 2             | 72        | 27                      | 610         | 0                | 0             | 0                           |  |
| FIT-DNA 45-75 y |                                                                     |      |      |      |                |                   |                   |            |               |           |                         |             |                  |               |                             |  |
| 1 y             | 12,989                                                              | 0    | 0    | 0    | 1,588          | 1,526             | 7                 | 3,122      | 13            | 11        | 3                       | 133         | 279              | 85            | 89                          |  |
| 3 y             | 7,061                                                               | 0    | 0    | 0    | 922            | 1,136             | 15                | 2,073      | 10            | 20        | 6                       | 235         | 244              | 72            | 79                          |  |
| 5 y             | 5,195                                                               | 0    | 0    | 0    | 704            | 942               | 21                | 1,667      | 9             | 27        | 8                       | 299         | 212              | 62            | 70                          |  |
| FIT-DNA 45-80 y |                                                                     |      |      |      |                |                   |                   |            |               |           |                         |             |                  |               |                             |  |
| 1 y             | 14,025                                                              | 0    | 0    | 0    | 1,716          | 1,556             | 5                 | 3,278      | 14            | 9         | 2                       | 128         | 283              | 87            | 92                          |  |
| 3 y             | 7,650                                                               | 0    | 0    | 0    | 1,002          | 1,164             | 12                | 2,178      | 11            | 18        | 5                       | 231         | 250              | 74            | 82                          |  |
| 5 y             | 5,586                                                               | 0    | 0    | 0    | 762            | 965               | 18                | 1,745      | 10            | 25        | 7                       | 297         | 218              | 65            | 73                          |  |
| FIT-DNA 45-85 y |                                                                     |      |      |      |                |                   |                   |            |               |           |                         |             |                  |               |                             |  |
| 1 y             | 14,768                                                              | 0    | 0    | 0    | 1,809          | 1,573             | 4                 | 3,386      | 15            | 8         | 2                       | 127         | 284              | 88            | 93                          |  |
| 3 y             | 8,124                                                               | 0    | 0    | 0    | 1,069          | 1,184             | 10                | 2,263      | 13            | 17        | 4                       | 229         | 253              | 76            | 84                          |  |
| 5 y             | 5,850                                                               | 0    | 0    | 0    | 803            | 979               | 16                | 1,798      | 11            | 25        | 7                       | 296         | 220              | 66            | 75                          |  |
| FIT-DNA 50-75 y |                                                                     |      |      |      |                |                   |                   |            |               |           |                         |             |                  |               |                             |  |
| 1 y             | 10,745                                                              | 0    | 0    | 0    | 1,348          | 1,371             | 9                 | 2,729      | 13            | 13        | 4                       | 178         | 261              | 82            | 87                          |  |
| 3 y             | 5,927                                                               | 0    | 0    | 0    | 800            | 1,011             | 17                | 1,827      | 10            | 23        | 7                       | 278         | 226              | 68            | 76                          |  |
| 5 y             | 4,370                                                               | 0    | 0    | 0    | 612            | 837               | 23                | 1,473      | 9             | 30        | 9                       | 337         | 195              | 58            | 66                          |  |
| FIT-DNA 50-80 y |                                                                     |      |      |      |                |                   |                   |            |               |           |                         |             |                  |               |                             |  |
| 1 y             | 11,795                                                              | 0    | 0    | 0    | 1,478          | 1,401             | 7                 | 2,886      | 14            | 11        | 3                       | 173         | 265              | 84            | 89                          |  |
| 3 y             | 6,476                                                               | 0    | 0    | 0    | 876            | 1,040             | 14                | 1,931      | 11            | 21        | 6                       | 273         | 232              | 71            | 79                          |  |
| 5 y             | 4,762                                                               | 0    | 0    | 0    | 672            | 862               | 20                | 1,554      | 10            | 28        | 8                       | 334         | 200              | 61            | 70                          |  |
| FIT-DNA 50-85 y |                                                                     |      |      |      |                |                   |                   |            |               |           |                         |             |                  |               |                             |  |
| 1 y             | 12,542                                                              | 0    | 0    | 0    | 1,571          | 1,418             | 6                 | 2,994      | 15            | 11        | 3                       | 173         | 266              | 85            | 91                          |  |
| 3 y             | 6,903                                                               | 0    | 0    | 0    | 935            | 1,058             | 12                | 2,005      | 12            | 20        | 5                       | 272         | 235              | 72            | 81                          |  |
| 5 y             | 5,028                                                               | 0    | 0    | 0    | 713            | 875               | 18                | 1,606      | 11            | 27        | 8                       | 333         | 203              | 62            | 72                          |  |
| FIT-DNA 55-75 y |                                                                     |      |      |      |                |                   |                   |            |               |           |                         |             |                  |               |                             |  |
| 1 y             | 8,647                                                               | 0    | 0    | 0    | 1,121          | 1,182             | 12                | 2,315      | 12            | 17        | 5                       | 239         | 234              | 77            | 82                          |  |
| 3 y             | 4,640                                                               | 0    | 0    | 0    | 652            | 847               | 21                | 1,520      | 10            | 28        | 8                       | 335         | 197              | 62            | 69                          |  |
| 5 y             | 3,570                                                               | 0    | 0    | 0    | 522            | 713               | 26                | 1,261      | 9             | 33        | 10                      | 383         | 172              | 53            | 62                          |  |
| FIT-DNA 55-80 y |                                                                     |      |      |      |                |                   |                   |            |               |           |                         |             |                  |               |                             |  |
| 1 y             | 9,673                                                               | 0    | 0    | 0    | 1,250          | 1,212             | 10                | 2,471      | 14            | 15        | 4                       | 235         | 238              | 79            | 85                          |  |
| 3 y             | 5,379                                                               | 0    | 0    | 0    | 756            | 890               | 17                | 1,663      | 11            | 25        | 7                       | 328         | 206              | 66            | 75                          |  |
| 5 y             | 3,967                                                               | 0    | 0    | 0    | 582            | 738               | 23                | 1,343      | 10            | 32        | 9                       | 380         | 177              | 56            | 65                          |  |
| FIT-DNA 55-85 y |                                                                     |      |      |      |                |                   |                   |            |               |           |                         |             |                  |               |                             |  |
| 1 y             | 10,427                                                              | 0    | 0    | 0    | 1,343          | 1,230             | 9                 | 2,582      | 15            | 14        | 4                       | 233         | 239              | 80            | 86                          |  |
| 3 y             | 5,774                                                               | 0    | 0    | 0    | 812            | 907               | 15                | 1,734      | 12            | 24        | 6                       | 327         | 209              | 67            | 77                          |  |
| 5 y             | 4,235                                                               | 0    | 0    | 0    | 624            | 752               | 21                | 1,397      | 11            | 31        | 9                       | 380         | 180              | 57            | 67                          |  |

COL indicates colonoscopy; CRC, colorectal cancer; CRC-SPIN, CRC Simulated Population Model for Incidence and Natural History; CTC, computed tomographic colonography; FIT-DNA, fecal immunochemical test with a DNA stool test; LY, life-years; LYG, LY gained compared with no screening; SIG, flexible sigmoidoscopy.

<sup>a</sup> Including deaths from complications of screening.

<sup>b</sup> Compared with no screening.



**eTable 7a.** Outcomes with SIG screening strategies that vary by the ages to begin and end screening and screening interval: **SimCRC**.

| Strategy     | Outcomes per 1,000 persons free of diagnosed cancer at age 40 years |             |      |      |                |                   |                   |            |               |           |                         |             |                  |               | Reductions <sup>b</sup> (%) |      |
|--------------|---------------------------------------------------------------------|-------------|------|------|----------------|-------------------|-------------------|------------|---------------|-----------|-------------------------|-------------|------------------|---------------|-----------------------------|------|
|              | Screening tests                                                     |             |      |      | Follow-up COLs | Surveillance COLs | COLs for symptoms | Total COLs | Complications | CRC cases | CRC deaths <sup>a</sup> | LY with CRC | LYG <sup>b</sup> | CRC incidence | CRC mortality               |      |
|              | Modality, age to begin-end Screening interval                       | Stool tests | SIGs | CTCs |                |                   |                   |            |               |           |                         |             |                  |               |                             | COLs |
| No screening | 0                                                                   | 0           | 0    | 0    | 0              | 0                 | 70                | 70         | 2             | 70        | 28                      | 608         | 0                | 0             | 0                           |      |
| SIG 45-75 y  |                                                                     |             |      |      |                |                   |                   |            |               |           |                         |             |                  |               |                             |      |
| 5 y          | 0                                                                   | 4,912       | 0    | 0    | 873            | 1,153             | 13                | 2,039      | 11            | 20        | 6                       | 250         | 251              | 72            | 77                          |      |
| 10 y         | 0                                                                   | 3,196       | 0    | 0    | 625            | 935               | 18                | 1,578      | 9             | 26        | 8                       | 303         | 225              | 63            | 70                          |      |
| SIG 45-80 y  |                                                                     |             |      |      |                |                   |                   |            |               |           |                         |             |                  |               |                             |      |
| 5 y          | 0                                                                   | 5,258       | 0    | 0    | 939            | 1,178             | 11                | 2,128      | 12            | 19        | 6                       | 250         | 253              | 73            | 79                          |      |
| 10 y         | 0                                                                   | 3,196       | 0    | 0    | 625            | 935               | 18                | 1,578      | 9             | 26        | 8                       | 303         | 225              | 63            | 70                          |      |
| SIG 45-85 y  |                                                                     |             |      |      |                |                   |                   |            |               |           |                         |             |                  |               |                             |      |
| 5 y          | 0                                                                   | 5,489       | 0    | 0    | 982            | 1,190             | 11                | 2,183      | 13            | 19        | 6                       | 251         | 253              | 73            | 80                          |      |
| 10 y         | 0                                                                   | 3,485       | 0    | 0    | 689            | 959               | 16                | 1,664      | 11            | 25        | 8                       | 306         | 226              | 64            | 71                          |      |
| SIG 50-75 y  |                                                                     |             |      |      |                |                   |                   |            |               |           |                         |             |                  |               |                             |      |
| 5 y          | 0                                                                   | 4,111       | 0    | 0    | 761            | 1,044             | 15                | 1,820      | 10            | 23        | 7                       | 299         | 227              | 67            | 74                          |      |
| 10 y         | 0                                                                   | 2,480       | 0    | 0    | 503            | 820               | 22                | 1,345      | 8             | 30        | 10                      | 345         | 200              | 58            | 64                          |      |
| SIG 50-80 y  |                                                                     |             |      |      |                |                   |                   |            |               |           |                         |             |                  |               |                             |      |
| 5 y          | 0                                                                   | 4,459       | 0    | 0    | 827            | 1,069             | 14                | 1,910      | 11            | 22        | 7                       | 299         | 229              | 69            | 75                          |      |
| 10 y         | 0                                                                   | 2,910       | 0    | 0    | 599            | 867               | 18                | 1,484      | 10            | 28        | 9                       | 345         | 205              | 60            | 68                          |      |
| SIG 50-85 y  |                                                                     |             |      |      |                |                   |                   |            |               |           |                         |             |                  |               |                             |      |
| 5 y          | 0                                                                   | 4,691       | 0    | 0    | 871            | 1,082             | 13                | 1,965      | 12            | 22        | 7                       | 299         | 229              | 69            | 76                          |      |
| 10 y         | 0                                                                   | 2,910       | 0    | 0    | 599            | 867               | 18                | 1,484      | 10            | 28        | 9                       | 345         | 205              | 60            | 68                          |      |
| SIG 55-75 y  |                                                                     |             |      |      |                |                   |                   |            |               |           |                         |             |                  |               |                             |      |
| 5 y          | 0                                                                   | 3,342       | 0    | 0    | 651            | 909               | 18                | 1,578      | 10            | 27        | 9                       | 359         | 196              | 61            | 68                          |      |
| 10 y         | 0                                                                   | 2,277       | 0    | 0    | 492            | 753               | 22                | 1,267      | 9             | 32        | 11                      | 394         | 177              | 55            | 62                          |      |
| SIG 55-80 y  |                                                                     |             |      |      |                |                   |                   |            |               |           |                         |             |                  |               |                             |      |
| 5 y          | 0                                                                   | 3,692       | 0    | 0    | 718            | 935               | 17                | 1,669      | 11            | 26        | 8                       | 359         | 198              | 63            | 70                          |      |
| 10 y         | 0                                                                   | 2,277       | 0    | 0    | 492            | 753               | 22                | 1,267      | 9             | 32        | 11                      | 394         | 177              | 55            | 62                          |      |
| SIG 55-85 y  |                                                                     |             |      |      |                |                   |                   |            |               |           |                         |             |                  |               |                             |      |
| 5 y          | 0                                                                   | 3,926       | 0    | 0    | 762            | 948               | 16                | 1,725      | 12            | 26        | 8                       | 360         | 199              | 63            | 70                          |      |
| 10 y         | 0                                                                   | 2,569       | 0    | 0    | 557            | 777               | 20                | 1,354      | 11            | 31        | 10                      | 396         | 179              | 55            | 63                          |      |

COL indicates colonoscopy; CRC, colorectal cancer; CTC, computed tomographic colonography; LY, life-years; LYG, LY gained compared with no screening; SIG, flexible sigmoidoscopy; SimCRC, Simulation Model of CRC.

<sup>a</sup> Including deaths from complications of screening.

<sup>b</sup> Compared with no screening.

**eTable 7b.** Outcomes with SIG screening strategies that vary by the ages to begin and end screening and screening interval: **MISCAN**.

| Strategy     | Outcomes per 1,000 persons free of diagnosed cancer at age 40 years |             |      |      |                |                   |                   |            |               |           |                         |             |                  |               | Reductions <sup>b</sup> (%) |      |
|--------------|---------------------------------------------------------------------|-------------|------|------|----------------|-------------------|-------------------|------------|---------------|-----------|-------------------------|-------------|------------------|---------------|-----------------------------|------|
|              | Screening tests                                                     |             |      |      | Follow-up COLs | Surveillance COLs | COLs for symptoms | Total COLs | Complications | CRC cases | CRC deaths <sup>a</sup> | LY with CRC | LYG <sup>b</sup> | CRC incidence | CRC mortality               |      |
|              | Modality, age to begin-end Screening interval                       | Stool tests | SIGs | CTCs |                |                   |                   |            |               |           |                         |             |                  |               |                             | COLs |
| No screening | 0                                                                   | 0           | 0    | 0    | 0              | 0                 | 67                | 67         | 1             | 67        | 28                      | 565         | 0                | 0             | 0                           |      |
| SIG 45-75 y  |                                                                     |             |      |      |                |                   |                   |            |               |           |                         |             |                  |               |                             |      |
| 5 y          | 0                                                                   | 4,572       | 0    | 0    | 929            | 1,588             | 15                | 2,533      | 12            | 28        | 7                       | 367         | 234              | 58            | 74                          |      |
| 10 y         | 0                                                                   | 3,030       | 0    | 0    | 706            | 1,398             | 18                | 2,122      | 12            | 31        | 9                       | 397         | 213              | 53            | 68                          |      |
| SIG 45-80 y  |                                                                     |             |      |      |                |                   |                   |            |               |           |                         |             |                  |               |                             |      |
| 5 y          | 0                                                                   | 4,893       | 0    | 0    | 991            | 1,606             | 14                | 2,611      | 13            | 27        | 7                       | 367         | 236              | 59            | 75                          |      |
| 10 y         | 0                                                                   | 3,030       | 0    | 0    | 706            | 1,398             | 18                | 2,122      | 12            | 31        | 9                       | 397         | 213              | 53            | 68                          |      |
| SIG 45-85 y  |                                                                     |             |      |      |                |                   |                   |            |               |           |                         |             |                  |               |                             |      |
| 5 y          | 0                                                                   | 5,112       | 0    | 0    | 1,027          | 1,612             | 13                | 2,653      | 14            | 27        | 7                       | 368         | 236              | 59            | 75                          |      |
| 10 y         | 0                                                                   | 3,298       | 0    | 0    | 762            | 1,412             | 17                | 2,191      | 13            | 31        | 8                       | 400         | 214              | 53            | 69                          |      |
| SIG 50-75 y  |                                                                     |             |      |      |                |                   |                   |            |               |           |                         |             |                  |               |                             |      |
| 5 y          | 0                                                                   | 3,807       | 0    | 0    | 820            | 1,450             | 16                | 2,287      | 12            | 29        | 8                       | 386         | 221              | 56            | 72                          |      |
| 10 y         | 0                                                                   | 2,356       | 0    | 0    | 592            | 1,268             | 21                | 1,881      | 11            | 33        | 10                      | 412         | 201              | 50            | 65                          |      |
| SIG 50-80 y  |                                                                     |             |      |      |                |                   |                   |            |               |           |                         |             |                  |               |                             |      |
| 5 y          | 0                                                                   | 4,129       | 0    | 0    | 882            | 1,468             | 15                | 2,365      | 13            | 28        | 7                       | 387         | 223              | 57            | 73                          |      |
| 10 y         | 0                                                                   | 2,746       | 0    | 0    | 680            | 1,303             | 18                | 2,001      | 12            | 32        | 9                       | 414         | 205              | 52            | 68                          |      |
| SIG 50-85 y  |                                                                     |             |      |      |                |                   |                   |            |               |           |                         |             |                  |               |                             |      |
| 5 y          | 0                                                                   | 4,349       | 0    | 0    | 919            | 1,474             | 14                | 2,408      | 14            | 28        | 7                       | 388         | 224              | 57            | 74                          |      |
| 10 y         | 0                                                                   | 2,746       | 0    | 0    | 680            | 1,303             | 18                | 2,001      | 12            | 32        | 9                       | 414         | 205              | 52            | 68                          |      |
| SIG 55-75 y  |                                                                     |             |      |      |                |                   |                   |            |               |           |                         |             |                  |               |                             |      |
| 5 y          | 0                                                                   | 3,092       | 0    | 0    | 715            | 1,265             | 18                | 1,998      | 12            | 31        | 9                       | 415         | 200              | 53            | 68                          |      |
| 10 y         | 0                                                                   | 2,155       | 0    | 0    | 575            | 1,141             | 20                | 1,736      | 11            | 34        | 10                      | 435         | 185              | 49            | 64                          |      |
| SIG 55-80 y  |                                                                     |             |      |      |                |                   |                   |            |               |           |                         |             |                  |               |                             |      |
| 5 y          | 0                                                                   | 3,416       | 0    | 0    | 777            | 1,284             | 16                | 2,077      | 13            | 31        | 8                       | 416         | 202              | 54            | 70                          |      |
| 10 y         | 0                                                                   | 2,155       | 0    | 0    | 575            | 1,141             | 20                | 1,736      | 11            | 34        | 10                      | 435         | 185              | 49            | 64                          |      |
| SIG 55-85 y  |                                                                     |             |      |      |                |                   |                   |            |               |           |                         |             |                  |               |                             |      |
| 5 y          | 0                                                                   | 3,637       | 0    | 0    | 814            | 1,290             | 16                | 2,120      | 13            | 31        | 8                       | 416         | 202              | 54            | 70                          |      |
| 10 y         | 0                                                                   | 2,425       | 0    | 0    | 631            | 1,156             | 19                | 1,806      | 12            | 34        | 10                      | 438         | 186              | 49            | 65                          |      |

COL indicates colonoscopy; CRC, colorectal cancer; CTC, computed tomographic colonography; LY, life-years; LYG, LY gained compared with no screening; MISCAN, Microsimulation Screening Analysis; SIG, flexible sigmoidoscopy.

<sup>a</sup> Including deaths from complications of screening.

<sup>b</sup> Compared with no screening.

**eTable 7c.** Outcomes with SIG screening strategies that vary by the ages to begin and end screening and screening interval: **CRC-SPIN**.

| Strategy     | Outcomes per 1,000 persons free of diagnosed cancer at age 40 years |       |      |      |                |                   |                   |            |               |           |                         |             |                  |                             |               |
|--------------|---------------------------------------------------------------------|-------|------|------|----------------|-------------------|-------------------|------------|---------------|-----------|-------------------------|-------------|------------------|-----------------------------|---------------|
|              | Screening tests                                                     |       |      |      | Follow-up COLs | Surveillance COLs | COLs for symptoms | Total COLs | Complications | CRC cases | CRC deaths <sup>a</sup> | LY with CRC | LYG <sup>b</sup> | Reductions <sup>b</sup> (%) |               |
|              | Stool tests                                                         | SIGs  | CTCs | COLs |                |                   |                   |            |               |           |                         |             |                  | CRC incidence               | CRC mortality |
| No screening | 0                                                                   | 0     | 0    | 0    | 0              | 0                 | 72                | 72         | 2             | 72        | 27                      | 610         | 0                | 0                           | 0             |
| SIG 45-75 y  |                                                                     |       |      |      |                |                   |                   |            |               |           |                         |             |                  |                             |               |
| 5 y          | 0                                                                   | 5,128 | 0    | 0    | 759            | 883               | 27                | 1,669      | 9             | 28        | 10                      | 265         | 193              | 60                          | 63            |
| 10 y         | 0                                                                   | 3,256 | 0    | 0    | 546            | 776               | 29                | 1,351      | 8             | 31        | 11                      | 293         | 180              | 56                          | 60            |
| SIG 45-80 y  |                                                                     |       |      |      |                |                   |                   |            |               |           |                         |             |                  |                             |               |
| 5 y          | 0                                                                   | 5,535 | 0    | 0    | 816            | 902               | 25                | 1,743      | 10            | 27        | 9                       | 261         | 196              | 62                          | 65            |
| 10 y         | 0                                                                   | 3,256 | 0    | 0    | 546            | 776               | 29                | 1,351      | 8             | 31        | 11                      | 293         | 180              | 56                          | 60            |
| SIG 45-85 y  |                                                                     |       |      |      |                |                   |                   |            |               |           |                         |             |                  |                             |               |
| 5 y          | 0                                                                   | 5,817 | 0    | 0    | 855            | 913               | 24                | 1,792      | 11            | 26        | 9                       | 260         | 196              | 63                          | 66            |
| 10 y         | 0                                                                   | 3,580 | 0    | 0    | 602            | 796               | 27                | 1,425      | 10            | 30        | 10                      | 291         | 183              | 59                          | 62            |
| SIG 50-75 y  |                                                                     |       |      |      |                |                   |                   |            |               |           |                         |             |                  |                             |               |
| 5 y          | 0                                                                   | 4,298 | 0    | 0    | 656            | 810               | 28                | 1,493      | 9             | 30        | 10                      | 291         | 181              | 59                          | 62            |
| 10 y         | 0                                                                   | 2,515 | 0    | 0    | 438            | 690               | 33                | 1,161      | 7             | 34        | 12                      | 324         | 165              | 52                          | 55            |
| SIG 50-80 y  |                                                                     |       |      |      |                |                   |                   |            |               |           |                         |             |                  |                             |               |
| 5 y          | 0                                                                   | 4,705 | 0    | 0    | 712            | 829               | 26                | 1,567      | 10            | 28        | 10                      | 287         | 184              | 61                          | 64            |
| 10 y         | 0                                                                   | 2,983 | 0    | 0    | 519            | 725               | 29                | 1,273      | 9             | 31        | 11                      | 314         | 171              | 56                          | 60            |
| SIG 50-85 y  |                                                                     |       |      |      |                |                   |                   |            |               |           |                         |             |                  |                             |               |
| 5 y          | 0                                                                   | 4,987 | 0    | 0    | 752            | 839               | 25                | 1,616      | 10            | 28        | 9                       | 286         | 184              | 62                          | 65            |
| 10 y         | 0                                                                   | 2,983 | 0    | 0    | 519            | 725               | 29                | 1,273      | 9             | 31        | 11                      | 314         | 171              | 56                          | 60            |
| SIG 55-75 y  |                                                                     |       |      |      |                |                   |                   |            |               |           |                         |             |                  |                             |               |
| 5 y          | 0                                                                   | 3,494 | 0    | 0    | 556            | 716               | 30                | 1,301      | 9             | 32        | 11                      | 329         | 163              | 56                          | 59            |
| 10 y         | 0                                                                   | 2,324 | 0    | 0    | 424            | 637               | 32                | 1,093      | 8             | 34        | 12                      | 349         | 153              | 52                          | 55            |
| SIG 55-80 y  |                                                                     |       |      |      |                |                   |                   |            |               |           |                         |             |                  |                             |               |
| 5 y          | 0                                                                   | 3,902 | 0    | 0    | 614            | 735               | 28                | 1,377      | 9             | 30        | 11                      | 324         | 166              | 58                          | 61            |
| 10 y         | 0                                                                   | 2,324 | 0    | 0    | 424            | 637               | 32                | 1,093      | 8             | 34        | 12                      | 349         | 153              | 52                          | 55            |
| SIG 55-85 y  |                                                                     |       |      |      |                |                   |                   |            |               |           |                         |             |                  |                             |               |
| 5 y          | 0                                                                   | 4,184 | 0    | 0    | 653            | 745               | 27                | 1,425      | 10            | 30        | 10                      | 323         | 167              | 58                          | 62            |
| 10 y         | 0                                                                   | 2,649 | 0    | 0    | 481            | 657               | 30                | 1,168      | 9             | 33        | 11                      | 347         | 155              | 54                          | 58            |

COL indicates colonoscopy; CRC, colorectal cancer; CRC-SPIN, CRC Simulated Population Model for Incidence and Natural History; CTC, computed tomographic colonography; LY, life-years; LYG, LY gained compared with no screening; SIG, flexible sigmoidoscopy.

<sup>a</sup> Including deaths from complications of screening.

<sup>b</sup> Compared with no screening.

**eTable 8a.** Outcomes with SIG+HSgFOBT screening strategies that vary by the ages to begin and end screening and screening interval: **SimCRC**.

| Strategy<br>Modality, age to begin-end<br>Screening intervals <sup>a</sup> | Outcomes per 1,000 persons free of diagnosed cancer at age 40 years |       |      |      |                   |                      |                      |               |                    |              |                            |                |                  | Reductions <sup>c</sup> (%) |                  |
|----------------------------------------------------------------------------|---------------------------------------------------------------------|-------|------|------|-------------------|----------------------|----------------------|---------------|--------------------|--------------|----------------------------|----------------|------------------|-----------------------------|------------------|
|                                                                            | Screening tests                                                     |       |      |      | Follow-up<br>COLs | Surveillance<br>COLs | COLs for<br>symptoms | Total<br>COLs | Compli-<br>cations | CRC<br>cases | CRC<br>deaths <sup>b</sup> | LY with<br>CRC | LYG <sup>c</sup> | CRC<br>incidence            | CRC<br>mortality |
|                                                                            | Stool<br>tests                                                      | SIGs  | CTCs | COLs |                   |                      |                      |               |                    |              |                            |                |                  |                             |                  |
| No screening                                                               | 0                                                                   | 0     | 0    | 0    | 0                 | 0                    | 70                   | 70            | 2                  | 70           | 28                         | 608            | 0                | 0                           | 0                |
| SIG+HSgFOBT 45-75 y                                                        |                                                                     |       |      |      |                   |                      |                      |               |                    |              |                            |                |                  |                             |                  |
| 10 y, 1 y                                                                  | 13,505                                                              | 2,288 | 0    | 0    | 1,549             | 1,431                | 6                    | 2,986         | 12                 | 13           | 3                          | 208            | 297              | 81                          | 89               |
| 10 y, 2 y                                                                  | 8,963                                                               | 2,507 | 0    | 0    | 1,231             | 1,296                | 6                    | 2,534         | 11                 | 16           | 4                          | 245            | 290              | 78                          | 87               |
| 5 y, 2 y                                                                   | 8,223                                                               | 3,834 | 0    | 0    | 1,368             | 1,395                | 6                    | 2,768         | 12                 | 14           | 3                          | 218            | 294              | 80                          | 89               |
| 5 y, 3 y                                                                   | 6,136                                                               | 4,084 | 0    | 0    | 1,240             | 1,340                | 7                    | 2,587         | 12                 | 15           | 4                          | 229            | 289              | 79                          | 87               |
| SIG+HSgFOBT 45-80 y                                                        |                                                                     |       |      |      |                   |                      |                      |               |                    |              |                            |                |                  |                             |                  |
| 10 y, 1 y                                                                  | 14,574                                                              | 2,427 | 0    | 0    | 1,669             | 1,463                | 4                    | 3,136         | 14                 | 12           | 2                          | 207            | 300              | 83                          | 91               |
| 10 y, 2 y                                                                  | 9,534                                                               | 2,596 | 0    | 0    | 1,299             | 1,318                | 5                    | 2,622         | 12                 | 15           | 3                          | 245            | 293              | 79                          | 89               |
| 5 y, 2 y                                                                   | 8,787                                                               | 4,094 | 0    | 0    | 1,465             | 1,424                | 4                    | 2,893         | 13                 | 13           | 3                          | 217            | 297              | 82                          | 90               |
| 5 y, 3 y                                                                   | 6,609                                                               | 4,368 | 0    | 0    | 1,335             | 1,370                | 5                    | 2,710         | 13                 | 14           | 3                          | 230            | 292              | 80                          | 89               |
| SIG+HSgFOBT 45-85 y                                                        |                                                                     |       |      |      |                   |                      |                      |               |                    |              |                            |                |                  |                             |                  |
| 10 y, 1 y                                                                  | 15,322                                                              | 2,537 | 0    | 0    | 1,755             | 1,482                | 3                    | 3,239         | 15                 | 12           | 2                          | 208            | 301              | 83                          | 92               |
| 10 y, 2 y                                                                  | 10,153                                                              | 2,754 | 0    | 0    | 1,387             | 1,341                | 4                    | 2,731         | 14                 | 15           | 3                          | 247            | 294              | 79                          | 90               |
| 5 y, 2 y                                                                   | 9,291                                                               | 4,277 | 0    | 0    | 1,543             | 1,442                | 3                    | 2,988         | 14                 | 13           | 2                          | 218            | 298              | 82                          | 91               |
| 5 y, 3 y                                                                   | 6,964                                                               | 4,561 | 0    | 0    | 1,402             | 1,386                | 4                    | 2,792         | 14                 | 14           | 3                          | 231            | 293              | 80                          | 90               |
| SIG+HSgFOBT 50-75 y                                                        |                                                                     |       |      |      |                   |                      |                      |               |                    |              |                            |                |                  |                             |                  |
| 10 y, 1 y                                                                  | 11,100                                                              | 1,926 | 0    | 0    | 1,312             | 1,297                | 8                    | 2,616         | 12                 | 16           | 4                          | 265            | 271              | 77                          | 85               |
| 10 y, 2 y                                                                  | 7,212                                                               | 2,042 | 0    | 0    | 1,022             | 1,158                | 9                    | 2,190         | 11                 | 19           | 5                          | 298            | 262              | 72                          | 82               |
| 5 y, 2 y                                                                   | 6,689                                                               | 3,211 | 0    | 0    | 1,162             | 1,262                | 8                    | 2,431         | 12                 | 17           | 4                          | 274            | 267              | 76                          | 85               |
| 5 y, 3 y                                                                   | 5,099                                                               | 3,425 | 0    | 0    | 1,069             | 1,216                | 8                    | 2,294         | 12                 | 18           | 5                          | 284            | 263              | 74                          | 83               |
| SIG+HSgFOBT 50-80 y                                                        |                                                                     |       |      |      |                   |                      |                      |               |                    |              |                            |                |                  |                             |                  |
| 10 y, 1 y                                                                  | 12,172                                                              | 2,091 | 0    | 0    | 1,438             | 1,332                | 6                    | 2,776         | 13                 | 15           | 3                          | 264            | 274              | 78                          | 88               |
| 10 y, 2 y                                                                  | 8,100                                                               | 2,283 | 0    | 0    | 1,151             | 1,203                | 6                    | 2,360         | 13                 | 18           | 4                          | 299            | 267              | 75                          | 86               |
| 5 y, 2 y                                                                   | 7,423                                                               | 3,473 | 0    | 0    | 1,275             | 1,295                | 6                    | 2,576         | 13                 | 16           | 4                          | 274            | 270              | 77                          | 87               |
| 5 y, 3 y                                                                   | 5,559                                                               | 3,699 | 0    | 0    | 1,161             | 1,246                | 7                    | 2,413         | 13                 | 17           | 4                          | 284            | 265              | 76                          | 85               |
| SIG+HSgFOBT 50-85 y                                                        |                                                                     |       |      |      |                   |                      |                      |               |                    |              |                            |                |                  |                             |                  |
| 10 y, 1 y                                                                  | 12,922                                                              | 2,188 | 0    | 0    | 1,521             | 1,350                | 5                    | 2,875         | 15                 | 15           | 3                          | 264            | 274              | 79                          | 88               |
| 10 y, 2 y                                                                  | 8,502                                                               | 2,345 | 0    | 0    | 1,199             | 1,215                | 6                    | 2,420         | 13                 | 18           | 4                          | 300            | 268              | 75                          | 86               |
| 5 y, 2 y                                                                   | 7,818                                                               | 3,651 | 0    | 0    | 1,342             | 1,311                | 5                    | 2,658         | 14                 | 16           | 4                          | 275            | 271              | 78                          | 87               |
| 5 y, 3 y                                                                   | 5,893                                                               | 3,892 | 0    | 0    | 1,226             | 1,262                | 6                    | 2,494         | 14                 | 17           | 4                          | 285            | 266              | 76                          | 86               |
| SIG+HSgFOBT 55-75 y                                                        |                                                                     |       |      |      |                   |                      |                      |               |                    |              |                            |                |                  |                             |                  |
| 10 y, 1 y                                                                  | 8,817                                                               | 1,625 | 0    | 0    | 1,096             | 1,135                | 10                   | 2,241         | 12                 | 21           | 6                          | 334            | 237              | 71                          | 80               |
| 10 y, 2 y                                                                  | 5,898                                                               | 1,790 | 0    | 0    | 894               | 1,027                | 11                   | 1,932         | 11                 | 23           | 6                          | 362            | 231              | 67                          | 78               |
| 5 y, 2 y                                                                   | 5,432                                                               | 2,622 | 0    | 0    | 983               | 1,104                | 11                   | 2,097         | 12                 | 21           | 6                          | 342            | 233              | 69                          | 79               |
| 5 y, 3 y                                                                   | 4,013                                                               | 2,788 | 0    | 0    | 893               | 1,058                | 12                   | 1,963         | 11                 | 22           | 6                          | 350            | 229              | 68                          | 78               |
| SIG+HSgFOBT 55-80 y                                                        |                                                                     |       |      |      |                   |                      |                      |               |                    |              |                            |                |                  |                             |                  |
| 10 y, 1 y                                                                  | 9,891                                                               | 1,749 | 0    | 0    | 1,212             | 1,167                | 9                    | 2,387         | 13                 | 20           | 5                          | 333            | 240              | 72                          | 82               |
| 10 y, 2 y                                                                  | 6,471                                                               | 1,858 | 0    | 0    | 958               | 1,048                | 10                   | 2,016         | 12                 | 22           | 6                          | 363            | 233              | 68                          | 80               |
| 5 y, 2 y                                                                   | 5,985                                                               | 2,877 | 0    | 0    | 1,079             | 1,134                | 9                    | 2,221         | 13                 | 20           | 5                          | 342            | 236              | 71                          | 81               |

**eTable 8a.** Outcomes with SIG+HSgFOBT screening strategies that vary by the ages to begin and end screening and screening interval: **SimCRC (continued)**.

| Strategy                        | Outcomes per 1,000 persons free of diagnosed cancer at age 40 years |       |      |      |                |                   |                   |            |               |           |                         |             |                  | Reductions <sup>c</sup> (%) |               |
|---------------------------------|---------------------------------------------------------------------|-------|------|------|----------------|-------------------|-------------------|------------|---------------|-----------|-------------------------|-------------|------------------|-----------------------------|---------------|
|                                 | Screening tests                                                     |       |      |      | Follow-up COLs | Surveillance COLs | COLs for symptoms | Total COLs | Complications | CRC cases | CRC deaths <sup>b</sup> | LY with CRC | LYG <sup>c</sup> | CRC incidence               | CRC mortality |
|                                 | Stool tests                                                         | SIGs  | CTCs | COLs |                |                   |                   |            |               |           |                         |             |                  |                             |               |
| SIG+HSgFOBT 55-80 y (continued) |                                                                     |       |      |      |                |                   |                   |            |               |           |                         |             |                  |                             |               |
| 5 y, 3 y                        | 4,568                                                               | 3,067 | 0    | 0    | 995            | 1,091             | 9                 | 2,095      | 13            | 21        | 6                       | 351         | 232              | 69                          | 80            |
| SIG+HSgFOBT 55-85 y             |                                                                     |       |      |      |                |                   |                   |            |               |           |                         |             |                  |                             |               |
| 10 y, 1 y                       | 10,643                                                              | 1,861 | 0    | 0    | 1,299          | 1,186             | 8                 | 2,493      | 14            | 19        | 5                       | 334         | 241              | 73                          | 83            |
| 10 y, 2 y                       | 7,097                                                               | 2,022 | 0    | 0    | 1,049          | 1,072             | 8                 | 2,129      | 13            | 22        | 5                       | 365         | 234              | 69                          | 81            |
| 5 y, 2 y                        | 6,501                                                               | 3,056 | 0    | 0    | 1,157          | 1,152             | 8                 | 2,317      | 14            | 20        | 5                       | 343         | 237              | 71                          | 82            |
| 5 y, 3 y                        | 4,891                                                               | 3,253 | 0    | 0    | 1,058          | 1,106             | 9                 | 2,173      | 14            | 21        | 5                       | 352         | 233              | 70                          | 81            |

COL indicates colonoscopy; CRC, colorectal cancer; CTC, computed tomographic colonography; HSgFOBT, high-sensitivity guaiac-based fecal occult blood test; LY, life-years; LYG, LY gained compared with no screening; SIG, flexible sigmoidoscopy; SimCRC, Simulation Model of CRC.

<sup>a</sup> The first interval listed is for SIG and the second interval listed is for HSgFOBT.

<sup>b</sup> Including deaths from complications of screening.

<sup>c</sup> Compared with no screening.

**eTable 8b.** Outcomes with SIG+HSgFOBT screening strategies that vary by the ages to begin and end screening and screening interval: **MISCAN**.

| Strategy<br>Modality, age to begin-end<br>Screening intervals <sup>a</sup> | Outcomes per 1,000 persons free of diagnosed cancer at age 40 years |       |      |      |                   |                      |                      |               |                    |              |                            |                |                  | Reductions <sup>c</sup> (%) |                  |
|----------------------------------------------------------------------------|---------------------------------------------------------------------|-------|------|------|-------------------|----------------------|----------------------|---------------|--------------------|--------------|----------------------------|----------------|------------------|-----------------------------|------------------|
|                                                                            | Screening tests                                                     |       |      |      | Follow-up<br>COLs | Surveillance<br>COLs | COLs for<br>symptoms | Total<br>COLs | Compli-<br>cations | CRC<br>cases | CRC<br>deaths <sup>b</sup> | LY with<br>CRC | LYG <sup>c</sup> | CRC<br>incidence            | CRC<br>mortality |
|                                                                            | Stool<br>tests                                                      | SIGs  | CTCs | COLs |                   |                      |                      |               |                    |              |                            |                |                  |                             |                  |
| No screening                                                               | 0                                                                   | 0     | 0    | 0    | 0                 | 0                    | 67                   | 67            | 1                  | 67           | 28                         | 565            | 0                | 0                           | 0                |
| SIG+HSgFOBT 45-75 y                                                        |                                                                     |       |      |      |                   |                      |                      |               |                    |              |                            |                |                  |                             |                  |
| 10 y, 1 y                                                                  | 13,058                                                              | 2,016 | 0    | 0    | 1,525             | 1,676                | 10                   | 3,212         | 13                 | 26           | 6                          | 385            | 260              | 60                          | 80               |
| 10 y, 2 y                                                                  | 8,259                                                               | 2,090 | 0    | 0    | 1,166             | 1,520                | 13                   | 2,698         | 12                 | 29           | 7                          | 417            | 246              | 56                          | 76               |
| 5 y, 2 y                                                                   | 7,406                                                               | 3,400 | 0    | 0    | 1,312             | 1,663                | 12                   | 2,987         | 13                 | 27           | 6                          | 383            | 253              | 60                          | 78               |
| 5 y, 3 y                                                                   | 5,505                                                               | 3,717 | 0    | 0    | 1,216             | 1,651                | 12                   | 2,879         | 13                 | 27           | 6                          | 383            | 251              | 59                          | 78               |
| SIG+HSgFOBT 45-80 y                                                        |                                                                     |       |      |      |                   |                      |                      |               |                    |              |                            |                |                  |                             |                  |
| 10 y, 1 y                                                                  | 14,103                                                              | 2,016 | 0    | 0    | 1,609             | 1,686                | 9                    | 3,304         | 14                 | 26           | 5                          | 387            | 262              | 61                          | 81               |
| 10 y, 2 y                                                                  | 8,795                                                               | 2,090 | 0    | 0    | 1,210             | 1,527                | 11                   | 2,748         | 13                 | 29           | 6                          | 421            | 248              | 56                          | 77               |
| 5 y, 2 y                                                                   | 7,880                                                               | 3,649 | 0    | 0    | 1,401             | 1,684                | 10                   | 3,095         | 14                 | 26           | 6                          | 385            | 256              | 61                          | 80               |
| 5 y, 3 y                                                                   | 5,769                                                               | 3,957 | 0    | 0    | 1,285             | 1,668                | 11                   | 2,963         | 14                 | 27           | 6                          | 385            | 253              | 60                          | 79               |
| SIG+HSgFOBT 45-85 y                                                        |                                                                     |       |      |      |                   |                      |                      |               |                    |              |                            |                |                  |                             |                  |
| 10 y, 1 y                                                                  | 14,915                                                              | 2,161 | 0    | 0    | 1,704             | 1,698                | 8                    | 3,410         | 15                 | 26           | 5                          | 389            | 264              | 61                          | 82               |
| 10 y, 2 y                                                                  | 9,400                                                               | 2,249 | 0    | 0    | 1,294             | 1,541                | 10                   | 2,845         | 14                 | 29           | 6                          | 425            | 249              | 56                          | 79               |
| 5 y, 2 y                                                                   | 8,399                                                               | 3,782 | 0    | 0    | 1,466             | 1,690                | 9                    | 3,165         | 14                 | 26           | 5                          | 387            | 257              | 61                          | 81               |
| 5 y, 3 y                                                                   | 6,170                                                               | 4,142 | 0    | 0    | 1,351             | 1,677                | 10                   | 3,037         | 14                 | 27           | 6                          | 387            | 254              | 60                          | 80               |
| SIG+HSgFOBT 50-75 y                                                        |                                                                     |       |      |      |                   |                      |                      |               |                    |              |                            |                |                  |                             |                  |
| 10 y, 1 y                                                                  | 10,562                                                              | 1,633 | 0    | 0    | 1,276             | 1,525                | 12                   | 2,814         | 13                 | 28           | 6                          | 403            | 245              | 58                          | 77               |
| 10 y, 2 y                                                                  | 6,594                                                               | 1,677 | 0    | 0    | 972               | 1,387                | 15                   | 2,374         | 12                 | 31           | 7                          | 431            | 231              | 53                          | 73               |
| 5 y, 2 y                                                                   | 5,947                                                               | 2,882 | 0    | 0    | 1,129             | 1,525                | 12                   | 2,667         | 13                 | 28           | 7                          | 401            | 240              | 58                          | 77               |
| 5 y, 3 y                                                                   | 4,462                                                               | 3,146 | 0    | 0    | 1,058             | 1,517                | 13                   | 2,587         | 13                 | 28           | 7                          | 400            | 238              | 58                          | 76               |
| SIG+HSgFOBT 50-80 y                                                        |                                                                     |       |      |      |                   |                      |                      |               |                    |              |                            |                |                  |                             |                  |
| 10 y, 1 y                                                                  | 11,686                                                              | 1,844 | 0    | 0    | 1,414             | 1,554                | 10                   | 2,977         | 14                 | 27           | 6                          | 405            | 249              | 60                          | 80               |
| 10 y, 2 y                                                                  | 7,423                                                               | 1,908 | 0    | 0    | 1,093             | 1,419                | 12                   | 2,524         | 13                 | 30           | 7                          | 435            | 236              | 55                          | 77               |
| 5 y, 2 y                                                                   | 6,666                                                               | 3,079 | 0    | 0    | 1,225             | 1,542                | 11                   | 2,778         | 14                 | 27           | 6                          | 403            | 243              | 59                          | 78               |
| 5 y, 3 y                                                                   | 4,963                                                               | 3,362 | 0    | 0    | 1,139             | 1,533                | 11                   | 2,683         | 14                 | 28           | 6                          | 402            | 240              | 58                          | 78               |
| SIG+HSgFOBT 50-85 y                                                        |                                                                     |       |      |      |                   |                      |                      |               |                    |              |                            |                |                  |                             |                  |
| 10 y, 1 y                                                                  | 12,442                                                              | 1,844 | 0    | 0    | 1,475             | 1,558                | 9                    | 3,042         | 15                 | 27           | 5                          | 407            | 250              | 60                          | 80               |
| 10 y, 2 y                                                                  | 7,811                                                               | 1,908 | 0    | 0    | 1,125             | 1,422                | 11                   | 2,558         | 13                 | 30           | 6                          | 437            | 237              | 55                          | 77               |
| 5 y, 2 y                                                                   | 7,009                                                               | 3,248 | 0    | 0    | 1,284             | 1,550                | 10                   | 2,844         | 14                 | 27           | 6                          | 405            | 243              | 59                          | 79               |
| 5 y, 3 y                                                                   | 5,154                                                               | 3,526 | 0    | 0    | 1,183             | 1,539                | 11                   | 2,733         | 14                 | 28           | 6                          | 403            | 241              | 58                          | 78               |
| SIG+HSgFOBT 55-75 y                                                        |                                                                     |       |      |      |                   |                      |                      |               |                    |              |                            |                |                  |                             |                  |
| 10 y, 1 y                                                                  | 8,346                                                               | 1,506 | 0    | 0    | 1,100             | 1,348                | 13                   | 2,461         | 13                 | 30           | 7                          | 429            | 222              | 55                          | 74               |
| 10 y, 2 y                                                                  | 5,368                                                               | 1,544 | 0    | 0    | 871               | 1,240                | 15                   | 2,126         | 12                 | 32           | 8                          | 452            | 212              | 52                          | 71               |
| 5 y, 2 y                                                                   | 4,866                                                               | 2,339 | 0    | 0    | 964               | 1,330                | 14                   | 2,308         | 13                 | 30           | 8                          | 428            | 217              | 55                          | 73               |
| 5 y, 3 y                                                                   | 3,459                                                               | 2,549 | 0    | 0    | 888               | 1,321                | 15                   | 2,225         | 12                 | 31           | 8                          | 427            | 214              | 54                          | 72               |
| SIG+HSgFOBT 55-80 y                                                        |                                                                     |       |      |      |                   |                      |                      |               |                    |              |                            |                |                  |                             |                  |
| 10 y, 1 y                                                                  | 9,391                                                               | 1,506 | 0    | 0    | 1,184             | 1,358                | 12                   | 2,554         | 13                 | 29           | 7                          | 432            | 224              | 56                          | 76               |
| 10 y, 2 y                                                                  | 5,901                                                               | 1,544 | 0    | 0    | 915               | 1,247                | 14                   | 2,176         | 12                 | 32           | 8                          | 455            | 214              | 52                          | 72               |
| 5 y, 2 y                                                                   | 5,334                                                               | 2,588 | 0    | 0    | 1,053             | 1,351                | 13                   | 2,417         | 14                 | 30           | 7                          | 430            | 220              | 56                          | 75               |

**eTable 8b.** Outcomes with SIG+HSgFOBT screening strategies that vary by the ages to begin and end screening and screening interval: **MISCAN (continued)**.

| Strategy<br>Modality, age to begin-end<br>Screening intervals <sup>a</sup> | Outcomes per 1,000 persons free of diagnosed cancer at age 40 years |       |      |           |       |              |          |          |         |         |                     |     |                  | Reductions <sup>c</sup> (%) |           |     |
|----------------------------------------------------------------------------|---------------------------------------------------------------------|-------|------|-----------|-------|--------------|----------|----------|---------|---------|---------------------|-----|------------------|-----------------------------|-----------|-----|
|                                                                            | Screening tests                                                     |       |      | Follow-up |       | Surveillance |          | COLs for | Total   | Compli- | CRC                 | CRC | LY with          | LYG <sup>c</sup>            | CRC       | CRC |
|                                                                            | Stool<br>tests                                                      | SIGs  | CTCs | COLs      | COLs  | COLs         | symptoms | COLs     | cations | cases   | deaths <sup>b</sup> | CRC | LYG <sup>c</sup> | incidence                   | mortality |     |
| SIG+HSgFOBT 55-80 y (continued)                                            |                                                                     |       |      |           |       |              |          |          |         |         |                     |     |                  |                             |           |     |
| 5 y, 3 y                                                                   | 4,010                                                               | 2,822 | 0    | 0         | 990   | 1,345        | 13       | 2,347    | 13      | 30      | 7                   | 430 | 218              | 55                          | 74        |     |
| SIG+HSgFOBT 55-85 y                                                        |                                                                     |       |      |           |       |              |          |          |         |         |                     |     |                  |                             |           |     |
| 10 y, 1 y                                                                  | 10,210                                                              | 1,651 | 0    | 0         | 1,280 | 1,371        | 11       | 2,662    | 14      | 29      | 6                   | 434 | 225              | 56                          | 77        |     |
| 10 y, 2 y                                                                  | 6,506                                                               | 1,703 | 0    | 0         | 999   | 1,262        | 13       | 2,273    | 13      | 32      | 7                   | 459 | 215              | 52                          | 74        |     |
| 5 y, 2 y                                                                   | 5,855                                                               | 2,722 | 0    | 0         | 1,118 | 1,358        | 12       | 2,488    | 14      | 29      | 7                   | 432 | 221              | 56                          | 76        |     |
| 5 y, 3 y                                                                   | 4,368                                                               | 2,969 | 0    | 0         | 1,043 | 1,351        | 12       | 2,406    | 14      | 30      | 7                   | 432 | 219              | 55                          | 75        |     |

COL indicates colonoscopy; CRC, colorectal cancer; CTC, computed tomographic colonography; HSgFOBT, high-sensitivity guaiac-based fecal occult blood test; LY, life-years; LYG, LY gained compared with no screening; MISCAN, Microsimulation Screening Analysis; SIG, flexible sigmoidoscopy.

<sup>a</sup> The first interval listed is for SIG and the second interval listed is for HSgFOBT.

<sup>b</sup> Including deaths from complications of screening.

<sup>c</sup> Compared with no screening.

**eTable 8c.** Outcomes with SIG+HSgFOBT screening strategies that vary by the ages to begin and end screening and screening interval: **CRC-SPIN.**

| Strategy<br>Modality, age to begin-end<br>Screening intervals <sup>a</sup> | Outcomes per 1,000 persons free of diagnosed cancer at age 40 years |       |      |      |           |       |              |       |          |                     |         |                     |     |                  |                  |                             |  |
|----------------------------------------------------------------------------|---------------------------------------------------------------------|-------|------|------|-----------|-------|--------------|-------|----------|---------------------|---------|---------------------|-----|------------------|------------------|-----------------------------|--|
|                                                                            | Screening tests                                                     |       |      |      | Follow-up |       | Surveillance |       | COLs for | Total               | Compli- | CRC                 | CRC | LY with          | LYG <sup>c</sup> | Reductions <sup>c</sup> (%) |  |
|                                                                            | Stool<br>tests                                                      | SIGs  | CTCs | COLs | COLs      | COLs  | symptoms     | COLs  | cases    | deaths <sup>b</sup> | CRC     | deaths <sup>b</sup> | CRC | LYG <sup>c</sup> | CRC<br>incidence | CRC<br>mortality            |  |
| No screening                                                               | 0                                                                   | 0     | 0    | 0    | 0         | 0     | 72           | 72    | 2        | 72                  | 27      | 610                 | 0   | 0                | 0                |                             |  |
| SIG+HSgFOBT 45-75 y                                                        |                                                                     |       |      |      |           |       |              |       |          |                     |         |                     |     |                  |                  |                             |  |
| 10 y, 1 y                                                                  | 13,791                                                              | 2,301 | 0    | 0    | 1,519     | 1,419 | 8            | 2,946 | 12       | 12                  | 3       | 136                 | 275 | 84               | 88               |                             |  |
| 10 y, 2 y                                                                  | 9,157                                                               | 2,532 | 0    | 0    | 1,191     | 1,253 | 11           | 2,455 | 11       | 15                  | 4       | 174                 | 261 | 79               | 84               |                             |  |
| 5 y, 2 y                                                                   | 8,525                                                               | 3,926 | 0    | 0    | 1,315     | 1,306 | 11           | 2,632 | 12       | 14                  | 4       | 163                 | 264 | 80               | 85               |                             |  |
| 5 y, 3 y                                                                   | 6,375                                                               | 4,199 | 0    | 0    | 1,176     | 1,221 | 13           | 2,410 | 11       | 17                  | 5       | 182                 | 253 | 77               | 82               |                             |  |
| SIG+HSgFOBT 45-80 y                                                        |                                                                     |       |      |      |           |       |              |       |          |                     |         |                     |     |                  |                  |                             |  |
| 10 y, 1 y                                                                  | 14,951                                                              | 2,448 | 0    | 0    | 1,639     | 1,447 | 6            | 3,092 | 14       | 10                  | 2       | 133                 | 279 | 86               | 91               |                             |  |
| 10 y, 2 y                                                                  | 9,778                                                               | 2,626 | 0    | 0    | 1,261     | 1,272 | 10           | 2,543 | 12       | 14                  | 4       | 172                 | 264 | 81               | 86               |                             |  |
| 5 y, 2 y                                                                   | 9,153                                                               | 4,211 | 0    | 0    | 1,411     | 1,333 | 9            | 2,753 | 13       | 13                  | 3       | 158                 | 268 | 82               | 87               |                             |  |
| 5 y, 3 y                                                                   | 6,904                                                               | 4,516 | 0    | 0    | 1,269     | 1,246 | 11           | 2,526 | 12       | 15                  | 4       | 178                 | 257 | 79               | 84               |                             |  |
| SIG+HSgFOBT 45-85 y                                                        |                                                                     |       |      |      |           |       |              |       |          |                     |         |                     |     |                  |                  |                             |  |
| 10 y, 1 y                                                                  | 15,779                                                              | 2,568 | 0    | 0    | 1,729     | 1,460 | 5            | 3,194 | 15       | 9                   | 2       | 130                 | 281 | 87               | 92               |                             |  |
| 10 y, 2 y                                                                  | 10,461                                                              | 2,798 | 0    | 0    | 1,350     | 1,287 | 8            | 2,645 | 14       | 13                  | 3       | 169                 | 267 | 82               | 88               |                             |  |
| 5 y, 2 y                                                                   | 9,734                                                               | 4,418 | 0    | 0    | 1,493     | 1,346 | 7            | 2,846 | 14       | 12                  | 3       | 156                 | 270 | 84               | 89               |                             |  |
| 5 y, 3 y                                                                   | 7,319                                                               | 4,735 | 0    | 0    | 1,339     | 1,261 | 9            | 2,609 | 13       | 14                  | 4       | 176                 | 259 | 81               | 86               |                             |  |
| SIG+HSgFOBT 50-75 y                                                        |                                                                     |       |      |      |           |       |              |       |          |                     |         |                     |     |                  |                  |                             |  |
| 10 y, 1 y                                                                  | 11,376                                                              | 1,940 | 0    | 0    | 1,288     | 1,283 | 10           | 2,581 | 12       | 14                  | 4       | 178                 | 258 | 81               | 85               |                             |  |
| 10 y, 2 y                                                                  | 7,386                                                               | 2,062 | 0    | 0    | 989       | 1,121 | 14           | 2,125 | 11       | 18                  | 5       | 217                 | 241 | 75               | 80               |                             |  |
| 5 y, 2 y                                                                   | 6,949                                                               | 3,297 | 0    | 0    | 1,113     | 1,180 | 13           | 2,305 | 12       | 17                  | 5       | 202                 | 246 | 77               | 82               |                             |  |
| 5 y, 3 y                                                                   | 5,314                                                               | 3,531 | 0    | 0    | 1,010     | 1,107 | 15           | 2,132 | 11       | 19                  | 6       | 220                 | 237 | 74               | 79               |                             |  |
| SIG+HSgFOBT 50-80 y                                                        |                                                                     |       |      |      |           |       |              |       |          |                     |         |                     |     |                  |                  |                             |  |
| 10 y, 1 y                                                                  | 12,537                                                              | 2,115 | 0    | 0    | 1,414     | 1,314 | 8            | 2,735 | 13       | 12                  | 3       | 173                 | 261 | 83               | 88               |                             |  |
| 10 y, 2 y                                                                  | 8,339                                                               | 2,318 | 0    | 0    | 1,116     | 1,162 | 11           | 2,288 | 12       | 16                  | 4       | 209                 | 248 | 78               | 84               |                             |  |
| 5 y, 2 y                                                                   | 7,774                                                               | 3,585 | 0    | 0    | 1,227     | 1,212 | 10           | 2,449 | 13       | 15                  | 4       | 196                 | 251 | 80               | 85               |                             |  |
| 5 y, 3 y                                                                   | 5,837                                                               | 3,836 | 0    | 0    | 1,101     | 1,136 | 12           | 2,249 | 12       | 17                  | 5       | 215                 | 241 | 77               | 82               |                             |  |
| SIG+HSgFOBT 50-85 y                                                        |                                                                     |       |      |      |           |       |              |       |          |                     |         |                     |     |                  |                  |                             |  |
| 10 y, 1 y                                                                  | 13,372                                                              | 2,220 | 0    | 0    | 1,500     | 1,327 | 7            | 2,834 | 15       | 11                  | 3       | 172                 | 263 | 84               | 90               |                             |  |
| 10 y, 2 y                                                                  | 8,790                                                               | 2,386 | 0    | 0    | 1,166     | 1,171 | 9            | 2,346 | 13       | 15                  | 4       | 208                 | 250 | 79               | 86               |                             |  |
| 5 y, 2 y                                                                   | 8,228                                                               | 3,786 | 0    | 0    | 1,296     | 1,224 | 9            | 2,529 | 14       | 14                  | 4       | 195                 | 252 | 81               | 87               |                             |  |
| 5 y, 3 y                                                                   | 6,218                                                               | 4,056 | 0    | 0    | 1,168     | 1,148 | 11           | 2,327 | 13       | 16                  | 4       | 213                 | 242 | 78               | 84               |                             |  |
| SIG+HSgFOBT 55-75 y                                                        |                                                                     |       |      |      |           |       |              |       |          |                     |         |                     |     |                  |                  |                             |  |
| 10 y, 1 y                                                                  | 9,070                                                               | 1,642 | 0    | 0    | 1,075     | 1,120 | 13           | 2,207 | 12       | 17                  | 5       | 234                 | 231 | 76               | 81               |                             |  |
| 10 y, 2 y                                                                  | 6,061                                                               | 1,815 | 0    | 0    | 862       | 991   | 16           | 1,869 | 11       | 21                  | 6       | 264                 | 218 | 71               | 77               |                             |  |
| 5 y, 2 y                                                                   | 5,674                                                               | 2,700 | 0    | 0    | 940       | 1,032 | 15           | 1,987 | 11       | 20                  | 6       | 255                 | 221 | 73               | 78               |                             |  |
| 5 y, 3 y                                                                   | 4,183                                                               | 2,881 | 0    | 0    | 838       | 961   | 18           | 1,817 | 11       | 22                  | 7       | 271                 | 211 | 69               | 75               |                             |  |
| SIG+HSgFOBT 55-80 y                                                        |                                                                     |       |      |      |           |       |              |       |          |                     |         |                     |     |                  |                  |                             |  |
| 10 y, 1 y                                                                  | 10,238                                                              | 1,773 | 0    | 0    | 1,194     | 1,147 | 11           | 2,351 | 13       | 16                  | 4       | 229                 | 235 | 78               | 84               |                             |  |
| 10 y, 2 y                                                                  | 6,685                                                               | 1,888 | 0    | 0    | 929       | 1,010 | 14           | 1,953 | 12       | 19                  | 6       | 263                 | 221 | 73               | 79               |                             |  |



**eTable 8c.** Outcomes with SIG+HSgFOBT screening strategies that vary by the ages to begin and end screening and screening interval: **CRC-SPIN (continued).**

| Strategy                        | Outcomes per 1,000 persons free of diagnosed cancer at age 40 years |             |      |      |                |                   |                   |            |               |           |                         |             |                  |                             |               |
|---------------------------------|---------------------------------------------------------------------|-------------|------|------|----------------|-------------------|-------------------|------------|---------------|-----------|-------------------------|-------------|------------------|-----------------------------|---------------|
|                                 | Screening tests                                                     |             |      |      | Follow-up COLs | Surveillance COLs | COLs for symptoms | Total COLs | Complications | CRC cases | CRC deaths <sup>b</sup> | LY with CRC | LYG <sup>c</sup> | Reductions <sup>c</sup> (%) |               |
|                                 | Modality, age to begin-end Screening intervals <sup>a</sup>         | Stool tests | SIGs | CTCs |                |                   |                   |            |               |           |                         |             |                  | COLs                        | CRC incidence |
| SIG+HSgFOBT 55-80 y (continued) |                                                                     |             |      |      |                |                   |                   |            |               |           |                         |             |                  |                             |               |
| 5 y, 2 y                        | 6,289                                                               | 2,980       | 0    | 0    | 1,035          | 1,059             | 13                | 2,107      | 12            | 18        | 5                       | 250         | 225              | 75                          | 81            |
| 5 y, 3 y                        | 4,815                                                               | 3,191       | 0    | 0    | 941            | 994               | 15                | 1,950      | 12            | 20        | 6                       | 265         | 216              | 72                          | 78            |
| SIG+HSgFOBT 55-85 y             |                                                                     |             |      |      |                |                   |                   |            |               |           |                         |             |                  |                             |               |
| 10 y, 1 y                       | 11,070                                                              | 1,896       | 0    | 0    | 1,284          | 1,161             | 9                 | 2,454      | 14            | 15        | 4                       | 228         | 237              | 80                          | 85            |
| 10 y, 2 y                       | 7,374                                                               | 2,067       | 0    | 0    | 1,020          | 1,025             | 12                | 2,057      | 13            | 18        | 5                       | 260         | 224              | 75                          | 82            |
| 5 y, 2 y                        | 6,885                                                               | 3,182       | 0    | 0    | 1,117          | 1,073             | 11                | 2,201      | 14            | 17        | 5                       | 248         | 226              | 76                          | 82            |
| 5 y, 3 y                        | 5,190                                                               | 3,403       | 0    | 0    | 1,006          | 1,006             | 14                | 2,025      | 13            | 19        | 5                       | 264         | 218              | 73                          | 79            |

COL indicates colonoscopy; CRC, colorectal cancer; CRC-SPIN, CRC Simulated Population Model for Incidence and Natural History; CTC, computed tomographic colonography; HSgFOBT, high-sensitivity guaiac-based fecal occult blood test; LY, life-years; LYG, LY gained compared with no screening; SIG, flexible sigmoidoscopy.

<sup>a</sup> The first interval listed is for SIG and the second interval listed is for HSgFOBT.

<sup>b</sup> Including deaths from complications of screening.

<sup>c</sup> Compared with no screening.

**eTable 9a.** Outcomes with SIG+FIT screening strategies that vary by the ages to begin and end screening and screening interval: **SimCRC**.

| Strategy        | Outcomes per 1,000 persons free of diagnosed cancer at age 40 years |                 |      |      |       |                   |                      |                      |               |                    |              |                            |                |                  | Reductions <sup>c</sup> (%) |                  |
|-----------------|---------------------------------------------------------------------|-----------------|------|------|-------|-------------------|----------------------|----------------------|---------------|--------------------|--------------|----------------------------|----------------|------------------|-----------------------------|------------------|
|                 | Modality, age to begin-end<br>Screening intervals <sup>a</sup>      | Screening tests |      |      |       | Follow-up<br>COLs | Surveillance<br>COLs | COLs for<br>symptoms | Total<br>COLs | Compli-<br>cations | CRC<br>cases | CRC<br>deaths <sup>b</sup> | LY with<br>CRC | LYG <sup>c</sup> | CRC<br>incidence            | CRC<br>mortality |
|                 |                                                                     | Stool<br>tests  | SIGs | CTCs | COLs  |                   |                      |                      |               |                    |              |                            |                |                  |                             |                  |
| No screening    | 0                                                                   | 0               | 0    | 0    | 0     | 0                 | 70                   | 70                   | 2             | 70                 | 28           | 608                        | 0              | 0                | 0                           |                  |
| SIG+FIT 45-75 y |                                                                     |                 |      |      |       |                   |                      |                      |               |                    |              |                            |                |                  |                             |                  |
| 10 y, 1 y       | 16,427                                                              | 2,553           | 0    | 0    | 1,197 | 1,357             | 6                    | 2,560                | 12            | 13                 | 3            | 214                        | 298            | 81               | 89                          |                  |
| 10 y, 2 y       | 9,933                                                               | 2,750           | 0    | 0    | 976   | 1,232             | 6                    | 2,214                | 11            | 16                 | 4            | 253                        | 290            | 77               | 87                          |                  |
| 5 y, 2 y        | 8,998                                                               | 4,258           | 0    | 0    | 1,154 | 1,352             | 6                    | 2,511                | 12            | 14                 | 3            | 222                        | 294            | 80               | 89                          |                  |
| 5 y, 3 y        | 6,508                                                               | 4,422           | 0    | 0    | 1,077 | 1,306             | 6                    | 2,389                | 11            | 15                 | 4            | 234                        | 289            | 78               | 87                          |                  |
| SIG+FIT 45-80 y |                                                                     |                 |      |      |       |                   |                      |                      |               |                    |              |                            |                |                  |                             |                  |
| 10 y, 1 y       | 17,761                                                              | 2,662           | 0    | 0    | 1,281 | 1,386             | 4                    | 2,670                | 13            | 12                 | 2            | 214                        | 300            | 82               | 91                          |                  |
| 10 y, 2 y       | 10,573                                                              | 2,807           | 0    | 0    | 1,020 | 1,249             | 5                    | 2,274                | 12            | 16                 | 3            | 254                        | 292            | 78               | 89                          |                  |
| 5 y, 2 y        | 9,635                                                               | 4,546           | 0    | 0    | 1,238 | 1,381             | 4                    | 2,623                | 13            | 13                 | 3            | 222                        | 297            | 81               | 90                          |                  |
| 5 y, 3 y        | 6,977                                                               | 4,727           | 0    | 0    | 1,157 | 1,334             | 5                    | 2,496                | 13            | 14                 | 3            | 235                        | 292            | 80               | 89                          |                  |
| SIG+FIT 45-85 y |                                                                     |                 |      |      |       |                   |                      |                      |               |                    |              |                            |                |                  |                             |                  |
| 10 y, 1 y       | 18,715                                                              | 2,804           | 0    | 0    | 1,355 | 1,405             | 3                    | 2,763                | 14            | 12                 | 2            | 214                        | 301            | 83               | 92                          |                  |
| 10 y, 2 y       | 11,285                                                              | 3,001           | 0    | 0    | 1,098 | 1,273             | 3                    | 2,374                | 13            | 15                 | 3            | 257                        | 294            | 78               | 90                          |                  |
| 5 y, 2 y        | 10,192                                                              | 4,742           | 0    | 0    | 1,302 | 1,398             | 3                    | 2,702                | 14            | 13                 | 2            | 223                        | 298            | 82               | 91                          |                  |
| 5 y, 3 y        | 7,372                                                               | 4,931           | 0    | 0    | 1,215 | 1,350             | 4                    | 2,569                | 14            | 14                 | 3            | 236                        | 293            | 80               | 90                          |                  |
| SIG+FIT 50-75 y |                                                                     |                 |      |      |       |                   |                      |                      |               |                    |              |                            |                |                  |                             |                  |
| 10 y, 1 y       | 13,393                                                              | 2,097           | 0    | 0    | 1,014 | 1,225             | 8                    | 2,248                | 11            | 17                 | 4            | 271                        | 270            | 76               | 85                          |                  |
| 10 y, 2 y       | 7,942                                                               | 2,196           | 0    | 0    | 810   | 1,097             | 10                   | 1,917                | 10            | 20                 | 5            | 306                        | 262            | 71               | 82                          |                  |
| 5 y, 2 y        | 7,296                                                               | 3,559           | 0    | 0    | 991   | 1,225             | 8                    | 2,224                | 11            | 17                 | 4            | 278                        | 267            | 75               | 85                          |                  |
| 5 y, 3 y        | 5,367                                                               | 3,700           | 0    | 0    | 934   | 1,185             | 8                    | 2,127                | 11            | 18                 | 5            | 288                        | 263            | 74               | 83                          |                  |
| SIG+FIT 50-80 y |                                                                     |                 |      |      |       |                   |                      |                      |               |                    |              |                            |                |                  |                             |                  |
| 10 y, 1 y       | 14,761                                                              | 2,320           | 0    | 0    | 1,125 | 1,265             | 6                    | 2,395                | 13            | 15                 | 3            | 270                        | 274            | 78               | 88                          |                  |
| 10 y, 2 y       | 8,960                                                               | 2,494           | 0    | 0    | 925   | 1,144             | 6                    | 2,076                | 12            | 18                 | 4            | 307                        | 267            | 74               | 86                          |                  |
| 5 y, 2 y        | 8,109                                                               | 3,846           | 0    | 0    | 1,085 | 1,257             | 6                    | 2,347                | 13            | 16                 | 4            | 278                        | 270            | 77               | 87                          |                  |
| 5 y, 3 y        | 5,887                                                               | 3,997           | 0    | 0    | 1,016 | 1,214             | 6                    | 2,237                | 12            | 17                 | 4            | 289                        | 266            | 75               | 85                          |                  |
| SIG+FIT 50-85 y |                                                                     |                 |      |      |       |                   |                      |                      |               |                    |              |                            |                |                  |                             |                  |
| 10 y, 1 y       | 15,698                                                              | 2,396           | 0    | 0    | 1,184 | 1,280             | 5                    | 2,469                | 14            | 15                 | 3            | 270                        | 275            | 78               | 88                          |                  |
| 10 y, 2 y       | 9,412                                                               | 2,534           | 0    | 0    | 957   | 1,154             | 5                    | 2,116                | 13            | 18                 | 4            | 308                        | 268            | 74               | 86                          |                  |
| 5 y, 2 y        | 8,557                                                               | 4,041           | 0    | 0    | 1,143 | 1,272             | 5                    | 2,419                | 14            | 16                 | 4            | 279                        | 271            | 77               | 87                          |                  |
| 5 y, 3 y        | 6,217                                                               | 4,202           | 0    | 0    | 1,071 | 1,229             | 6                    | 2,305                | 13            | 17                 | 4            | 290                        | 267            | 76               | 86                          |                  |
| SIG+FIT 55-75 y |                                                                     |                 |      |      |       |                   |                      |                      |               |                    |              |                            |                |                  |                             |                  |
| 10 y, 1 y       | 10,553                                                              | 1,817           | 0    | 0    | 874   | 1,080             | 10                   | 1,965                | 11            | 21                 | 5            | 339                        | 238            | 70               | 80                          |                  |
| 10 y, 2 y       | 6,468                                                               | 1,956           | 0    | 0    | 733   | 981               | 11                   | 1,725                | 11            | 23                 | 6            | 368                        | 231            | 67               | 78                          |                  |
| 5 y, 2 y        | 5,893                                                               | 2,893           | 0    | 0    | 846   | 1,071             | 11                   | 1,928                | 11            | 22                 | 6            | 346                        | 234            | 69               | 79                          |                  |
| 5 y, 3 y        | 4,200                                                               | 3,003           | 0    | 0    | 789   | 1,031             | 12                   | 1,832                | 11            | 23                 | 6            | 353                        | 229            | 68               | 78                          |                  |
| SIG+FIT 55-80 y |                                                                     |                 |      |      |       |                   |                      |                      |               |                    |              |                            |                |                  |                             |                  |
| 10 y, 1 y       | 11,892                                                              | 1,902           | 0    | 0    | 954   | 1,107             | 9                    | 2,069                | 12            | 20                 | 5            | 339                        | 240            | 71               | 82                          |                  |
| 10 y, 2 y       | 7,111                                                               | 1,997           | 0    | 0    | 774   | 997               | 10                   | 1,781                | 11            | 23                 | 6            | 370                        | 233            | 67               | 80                          |                  |
| 5 y, 2 y        | 6,514                                                               | 3,178           | 0    | 0    | 930   | 1,101             | 9                    | 2,039                | 12            | 21                 | 5            | 346                        | 236            | 70               | 81                          |                  |

**eTable 9a.** Outcomes with SIG+FIT screening strategies that vary by the ages to begin and end screening and screening interval: **SimCRC** (continued).

| Strategy<br>Modality, age to begin-end<br>Screening intervals <sup>a</sup> | Outcomes per 1,000 persons free of diagnosed cancer at age 40 years |       |      |           |       |              |          |          |         |         |                     |     |                  | Reductions <sup>c</sup> (%) |           |     |
|----------------------------------------------------------------------------|---------------------------------------------------------------------|-------|------|-----------|-------|--------------|----------|----------|---------|---------|---------------------|-----|------------------|-----------------------------|-----------|-----|
|                                                                            | Screening tests                                                     |       |      | Follow-up |       | Surveillance |          | COLs for | Total   | Compli- | CRC                 | CRC | LY with          | LYG <sup>c</sup>            | CRC       | CRC |
|                                                                            | Stool tests                                                         | SIGs  | CTCs | COLs      | COLs  | COLs         | symptoms | COLs     | cations | cases   | deaths <sup>b</sup> | CRC | LYG <sup>c</sup> | incidence                   | mortality |     |
| SIG+FIT 55-80 y (continued)                                                |                                                                     |       |      |           |       |              |          |          |         |         |                     |     |                  |                             |           |     |
| 5 y, 3 y                                                                   | 4,803                                                               | 3,305 | 0    | 0         | 877   | 1,063        | 9        | 1,950    | 12      | 22      | 6                   | 354 | 233              | 69                          | 80        |     |
| SIG+FIT 55-85 y                                                            |                                                                     |       |      |           |       |              |          |          |         |         |                     |     |                  |                             |           |     |
| 10 y, 1 y                                                                  | 12,853                                                              | 2,053 | 0    | 0         | 1,030 | 1,128        | 8        | 2,166    | 14      | 20      | 5                   | 340 | 241              | 72                          | 83        |     |
| 10 y, 2 y                                                                  | 7,830                                                               | 2,197 | 0    | 0         | 854   | 1,022        | 8        | 1,884    | 13      | 22      | 5                   | 372 | 235              | 68                          | 81        |     |
| 5 y, 2 y                                                                   | 7,087                                                               | 3,372 | 0    | 0         | 994   | 1,118        | 8        | 2,119    | 14      | 20      | 5                   | 347 | 237              | 71                          | 82        |     |
| 5 y, 3 y                                                                   | 5,168                                                               | 3,505 | 0    | 0         | 933   | 1,079        | 8        | 2,020    | 13      | 21      | 5                   | 356 | 233              | 69                          | 81        |     |

COL indicates colonoscopy; CRC, colorectal cancer; CTC, computed tomographic colonography; FIT, fecal immunochemical test with a positivity cutoff of  $\geq 100$  ng of hemoglobin (Hb) per mL of buffer ( $\geq 20$   $\mu$ g Hb/g of feces); LY, life-years; LYG, LY gained compared with no screening; SIG flexible sigmoidoscopy; SimCRC, Simulation Model of CRC.

<sup>a</sup> The first interval listed is for SIG and the second interval listed is for FIT.

<sup>b</sup> Including deaths from complications of screening.

<sup>c</sup> Compared with no screening.

**eTable 9b.** Outcomes with SIG+FIT screening strategies that vary by the ages to begin and end screening and screening interval: **MISCAN**.

| Strategy<br>Modality, age to begin-end<br>Screening intervals <sup>a</sup> | Outcomes per 1,000 persons free of diagnosed cancer at age 40 years |       |      |      |                   |                      |                      |               |                    |              |                            |                |                  | Reductions <sup>c</sup> (%) |                  |
|----------------------------------------------------------------------------|---------------------------------------------------------------------|-------|------|------|-------------------|----------------------|----------------------|---------------|--------------------|--------------|----------------------------|----------------|------------------|-----------------------------|------------------|
|                                                                            | Screening tests                                                     |       |      |      | Follow-up<br>COLs | Surveillance<br>COLs | COLs for<br>symptoms | Total<br>COLs | Compli-<br>cations | CRC<br>cases | CRC<br>deaths <sup>b</sup> | LY with<br>CRC | LYG <sup>c</sup> | CRC<br>incidence            | CRC<br>mortality |
|                                                                            | Stool<br>tests                                                      | SIGs  | CTCs | COLs |                   |                      |                      |               |                    |              |                            |                |                  |                             |                  |
| No screening                                                               | 0                                                                   | 0     | 0    | 0    | 0                 | 0                    | 67                   | 67            | 1                  | 67           | 28                         | 565            | 0                | 0                           | 0                |
| SIG+FIT 45-75 y                                                            |                                                                     |       |      |      |                   |                      |                      |               |                    |              |                            |                |                  |                             |                  |
| 10 y, 1 y                                                                  | 15,711                                                              | 2,397 | 0    | 0    | 1,196             | 1,620                | 10                   | 2,826         | 13                 | 26           | 5                          | 388            | 262              | 60                          | 80               |
| 10 y, 2 y                                                                  | 9,206                                                               | 2,381 | 0    | 0    | 946               | 1,478                | 12                   | 2,436         | 12                 | 30           | 7                          | 421            | 248              | 56                          | 76               |
| 5 y, 2 y                                                                   | 8,154                                                               | 3,824 | 0    | 0    | 1,126             | 1,641                | 11                   | 2,779         | 13                 | 27           | 6                          | 384            | 255              | 60                          | 79               |
| 5 y, 3 y                                                                   | 5,868                                                               | 4,014 | 0    | 0    | 1,068             | 1,630                | 12                   | 2,710         | 13                 | 27           | 6                          | 385            | 252              | 59                          | 78               |
| SIG+FIT 45-80 y                                                            |                                                                     |       |      |      |                   |                      |                      |               |                    |              |                            |                |                  |                             |                  |
| 10 y, 1 y                                                                  | 17,016                                                              | 2,397 | 0    | 0    | 1,249             | 1,627                | 9                    | 2,885         | 13                 | 26           | 5                          | 390            | 265              | 61                          | 82               |
| 10 y, 2 y                                                                  | 9,822                                                               | 2,381 | 0    | 0    | 972               | 1,483                | 11                   | 2,467         | 12                 | 29           | 6                          | 425            | 250              | 56                          | 78               |
| 5 y, 2 y                                                                   | 8,691                                                               | 4,106 | 0    | 0    | 1,205             | 1,662                | 10                   | 2,877         | 14                 | 26           | 5                          | 386            | 258              | 61                          | 81               |
| 5 y, 3 y                                                                   | 6,154                                                               | 4,274 | 0    | 0    | 1,131             | 1,647                | 10                   | 2,788         | 13                 | 27           | 6                          | 387            | 254              | 60                          | 79               |
| SIG+FIT 45-85 y                                                            |                                                                     |       |      |      |                   |                      |                      |               |                    |              |                            |                |                  |                             |                  |
| 10 y, 1 y                                                                  | 18,030                                                              | 2,585 | 0    | 0    | 1,328             | 1,640                | 8                    | 2,976         | 14                 | 26           | 5                          | 392            | 266              | 61                          | 83               |
| 10 y, 2 y                                                                  | 10,518                                                              | 2,571 | 0    | 0    | 1,042             | 1,498                | 10                   | 2,550         | 13                 | 29           | 6                          | 429            | 252              | 56                          | 79               |
| 5 y, 2 y                                                                   | 9,272                                                               | 4,264 | 0    | 0    | 1,255             | 1,668                | 9                    | 2,931         | 14                 | 26           | 5                          | 388            | 259              | 61                          | 81               |
| 5 y, 3 y                                                                   | 6,588                                                               | 4,476 | 0    | 0    | 1,186             | 1,656                | 9                    | 2,851         | 14                 | 27           | 5                          | 390            | 256              | 60                          | 80               |
| SIG+FIT 50-75 y                                                            |                                                                     |       |      |      |                   |                      |                      |               |                    |              |                            |                |                  |                             |                  |
| 10 y, 1 y                                                                  | 12,642                                                              | 1,903 | 0    | 0    | 1,004             | 1,474                | 12                   | 2,490         | 12                 | 28           | 6                          | 406            | 246              | 58                          | 77               |
| 10 y, 2 y                                                                  | 7,306                                                               | 1,886 | 0    | 0    | 793               | 1,349                | 15                   | 2,157         | 11                 | 31           | 7                          | 434            | 232              | 53                          | 73               |
| 5 y, 2 y                                                                   | 6,523                                                               | 3,221 | 0    | 0    | 983               | 1,505                | 12                   | 2,501         | 13                 | 28           | 6                          | 402            | 241              | 58                          | 77               |
| 5 y, 3 y                                                                   | 4,737                                                               | 3,380 | 0    | 0    | 940               | 1,498                | 13                   | 2,451         | 13                 | 28           | 7                          | 402            | 239              | 58                          | 76               |
| SIG+FIT 50-80 y                                                            |                                                                     |       |      |      |                   |                      |                      |               |                    |              |                            |                |                  |                             |                  |
| 10 y, 1 y                                                                  | 14,039                                                              | 2,177 | 0    | 0    | 1,121             | 1,504                | 9                    | 2,635         | 14                 | 27           | 5                          | 408            | 251              | 60                          | 80               |
| 10 y, 2 y                                                                  | 8,260                                                               | 2,164 | 0    | 0    | 898               | 1,383                | 11                   | 2,291         | 13                 | 30           | 6                          | 438            | 238              | 55                          | 77               |
| 5 y, 2 y                                                                   | 7,328                                                               | 3,453 | 0    | 0    | 1,060             | 1,522                | 11                   | 2,592         | 13                 | 27           | 6                          | 404            | 244              | 59                          | 79               |
| 5 y, 3 y                                                                   | 5,284                                                               | 3,625 | 0    | 0    | 1,008             | 1,514                | 11                   | 2,534         | 13                 | 28           | 6                          | 404            | 241              | 58                          | 78               |
| SIG+FIT 50-85 y                                                            |                                                                     |       |      |      |                   |                      |                      |               |                    |              |                            |                |                  |                             |                  |
| 10 y, 1 y                                                                  | 14,983                                                              | 2,177 | 0    | 0    | 1,159             | 1,507                | 9                    | 2,675         | 14                 | 27           | 5                          | 409            | 252              | 60                          | 81               |
| 10 y, 2 y                                                                  | 8,706                                                               | 2,164 | 0    | 0    | 917               | 1,385                | 11                   | 2,313         | 13                 | 30           | 6                          | 441            | 239              | 55                          | 78               |
| 5 y, 2 y                                                                   | 7,717                                                               | 3,646 | 0    | 0    | 1,111             | 1,530                | 10                   | 2,650         | 14                 | 27           | 6                          | 406            | 245              | 59                          | 79               |
| 5 y, 3 y                                                                   | 5,491                                                               | 3,802 | 0    | 0    | 1,048             | 1,520                | 11                   | 2,579         | 14                 | 28           | 6                          | 406            | 242              | 58                          | 78               |
| SIG+FIT 55-75 y                                                            |                                                                     |       |      |      |                   |                      |                      |               |                    |              |                            |                |                  |                             |                  |
| 10 y, 1 y                                                                  | 9,903                                                               | 1,743 | 0    | 0    | 891               | 1,308                | 13                   | 2,212         | 12                 | 30           | 7                          | 431            | 223              | 55                          | 75               |
| 10 y, 2 y                                                                  | 5,908                                                               | 1,728 | 0    | 0    | 731               | 1,211                | 15                   | 1,957         | 12                 | 32           | 8                          | 454            | 213              | 51                          | 71               |
| 5 y, 2 y                                                                   | 5,303                                                               | 2,601 | 0    | 0    | 844               | 1,313                | 14                   | 2,171         | 12                 | 30           | 7                          | 430            | 218              | 55                          | 73               |
| 5 y, 3 y                                                                   | 3,653                                                               | 2,729 | 0    | 0    | 799               | 1,306                | 15                   | 2,121         | 12                 | 31           | 8                          | 428            | 215              | 54                          | 72               |
| SIG+FIT 55-80 y                                                            |                                                                     |       |      |      |                   |                      |                      |               |                    |              |                            |                |                  |                             |                  |
| 10 y, 1 y                                                                  | 11,214                                                              | 1,743 | 0    | 0    | 944               | 1,316                | 12                   | 2,272         | 13                 | 29           | 7                          | 434            | 225              | 56                          | 76               |
| 10 y, 2 y                                                                  | 6,524                                                               | 1,728 | 0    | 0    | 757               | 1,217                | 14                   | 1,988         | 12                 | 32           | 8                          | 458            | 215              | 52                          | 73               |
| 5 y, 2 y                                                                   | 5,839                                                               | 2,884 | 0    | 0    | 924               | 1,334                | 12                   | 2,270         | 13                 | 30           | 7                          | 432            | 221              | 56                          | 75               |

**eTable 9b.** Outcomes with SIG+FIT screening strategies that vary by the ages to begin and end screening and screening interval: **MISCAN (continued).**

| Strategy<br>Modality, age to begin-end<br>Screening intervals <sup>a</sup> | Outcomes per 1,000 persons free of diagnosed cancer at age 40 years |       |      |           |       |              |          |          |         |         |                     |     |                  | Reductions <sup>c</sup> (%) |           |     |
|----------------------------------------------------------------------------|---------------------------------------------------------------------|-------|------|-----------|-------|--------------|----------|----------|---------|---------|---------------------|-----|------------------|-----------------------------|-----------|-----|
|                                                                            | Screening tests                                                     |       |      | Follow-up |       | Surveillance |          | COLs for | Total   | Compli- | CRC                 | CRC | LY with          | LYG <sup>c</sup>            | CRC       | CRC |
|                                                                            | Stool tests                                                         | SIGs  | CTCs | COLs      | COLs  | COLs         | symptoms | COLs     | cations | cases   | deaths <sup>b</sup> | CRC | LYG <sup>c</sup> | incidence                   | mortality |     |
| SIG+FIT 55-80 y (continued)                                                |                                                                     |       |      |           |       |              |          |          |         |         |                     |     |                  |                             |           |     |
| 5 y, 3 y                                                                   | 4,251                                                               | 3,027 | 0    | 0         | 885   | 1,330        | 13       | 2,228    | 13      | 30      | 7                   | 432 | 219              | 55                          | 75        |     |
| SIG+FIT 55-85 y                                                            |                                                                     |       |      |           |       |              |          |          |         |         |                     |     |                  |                             |           |     |
| 10 y, 1 y                                                                  | 12,233                                                              | 1,931 | 0    | 0         | 1,024 | 1,329        | 11       | 2,364    | 14      | 29      | 6                   | 436 | 227              | 56                          | 77        |     |
| 10 y, 2 y                                                                  | 7,222                                                               | 1,919 | 0    | 0         | 828   | 1,232        | 12       | 2,072    | 13      | 32      | 7                   | 462 | 217              | 52                          | 74        |     |
| 5 y, 2 y                                                                   | 6,422                                                               | 3,043 | 0    | 0         | 974   | 1,340        | 12       | 2,326    | 14      | 29      | 7                   | 433 | 222              | 56                          | 76        |     |
| 5 y, 3 y                                                                   | 4,641                                                               | 3,194 | 0    | 0         | 929   | 1,335        | 12       | 2,277    | 14      | 30      | 7                   | 433 | 220              | 55                          | 75        |     |

COL indicates colonoscopy; CRC, colorectal cancer; CTC, computed tomographic colonography; FIT, fecal immunochemical test with a positivity cutoff of  $\geq 100$  ng of hemoglobin (Hb) per mL of buffer ( $\geq 20$   $\mu$ g Hb/g of feces); LY, life-years; LYG, LY gained compared with no screening; MISCAN, Microsimulation Screening Analysis; SIG, flexible sigmoidoscopy.

<sup>a</sup> The first interval listed is for SIG and the second interval listed is for FIT.

<sup>b</sup> Including deaths from complications of screening.

<sup>c</sup> Compared with no screening.

**eTable 9c.** Outcomes with SIG+FIT screening strategies that vary by the ages to begin and end screening and screening interval: **CRC-SPIN**.

| Strategy        | Outcomes per 1,000 persons free of diagnosed cancer at age 40 years |             |      |      |                |                   |                   |            |                |           |                         |             |                  |               | Reductions <sup>c</sup> (%) |  |
|-----------------|---------------------------------------------------------------------|-------------|------|------|----------------|-------------------|-------------------|------------|----------------|-----------|-------------------------|-------------|------------------|---------------|-----------------------------|--|
|                 | Screening tests                                                     |             |      |      | Follow-up COLs | Surveillance COLs | COLs for symptoms | Total COLs | Compli-cations | CRC cases | CRC deaths <sup>b</sup> | LY with CRC | LYG <sup>c</sup> | CRC incidence | CRC mortality               |  |
|                 | Modality, age to begin-end Screening intervals <sup>a</sup>         | Stool tests | SIGs | CTCs |                |                   |                   |            |                |           |                         |             |                  |               |                             |  |
| No screening    | 0                                                                   | 0           | 0    | 0    | 0              | 0                 | 72                | 72         | 2              | 72        | 27                      | 610         | 0                | 0             | 0                           |  |
| SIG+FIT 45-75 y |                                                                     |             |      |      |                |                   |                   |            |                |           |                         |             |                  |               |                             |  |
| 10 y, 1 y       | 16,356                                                              | 2,523       | 0    | 0    | 1,188          | 1,409             | 9                 | 2,606      | 12             | 12        | 3                       | 149         | 274              | 83            | 88                          |  |
| 10 y, 2 y       | 10,007                                                              | 2,741       | 0    | 0    | 952            | 1,232             | 12                | 2,196      | 11             | 16        | 4                       | 188         | 259              | 78            | 83                          |  |
| 5 y, 2 y        | 9,231                                                               | 4,307       | 0    | 0    | 1,109          | 1,289             | 11                | 2,410      | 12             | 15        | 4                       | 174         | 262              | 79            | 84                          |  |
| 5 y, 3 y        | 6,720                                                               | 4,506       | 0    | 0    | 1,019          | 1,203             | 14                | 2,236      | 11             | 17        | 5                       | 193         | 251              | 76            | 81                          |  |
| SIG+FIT 45-80 y |                                                                     |             |      |      |                |                   |                   |            |                |           |                         |             |                  |               |                             |  |
| 10 y, 1 y       | 17,748                                                              | 2,637       | 0    | 0    | 1,275          | 1,435             | 6                 | 2,717      | 13             | 11        | 3                       | 145         | 278              | 85            | 90                          |  |
| 10 y, 2 y       | 10,688                                                              | 2,802       | 0    | 0    | 999            | 1,250             | 10                | 2,259      | 12             | 15        | 4                       | 185         | 262              | 79            | 85                          |  |
| 5 y, 2 y        | 9,927                                                               | 4,619       | 0    | 0    | 1,192          | 1,315             | 9                 | 2,516      | 13             | 13        | 3                       | 169         | 266              | 81            | 87                          |  |
| 5 y, 3 y        | 7,238                                                               | 4,841       | 0    | 0    | 1,097          | 1,228             | 11                | 2,336      | 12             | 16        | 4                       | 189         | 255              | 78            | 84                          |  |
| SIG+FIT 45-85 y |                                                                     |             |      |      |                |                   |                   |            |                |           |                         |             |                  |               |                             |  |
| 10 y, 1 y       | 18,755                                                              | 2,786       | 0    | 0    | 1,350          | 1,448             | 5                 | 2,804      | 14             | 10        | 2                       | 143         | 280              | 86            | 92                          |  |
| 10 y, 2 y       | 11,451                                                              | 3,007       | 0    | 0    | 1,075          | 1,264             | 8                 | 2,347      | 13             | 14        | 3                       | 184         | 265              | 81            | 88                          |  |
| 5 y, 2 y        | 10,558                                                              | 4,837       | 0    | 0    | 1,259          | 1,328             | 7                 | 2,594      | 14             | 13        | 3                       | 168         | 268              | 83            | 89                          |  |
| 5 y, 3 y        | 7,695                                                               | 5,071       | 0    | 0    | 1,157          | 1,242             | 10                | 2,409      | 13             | 15        | 4                       | 187         | 258              | 79            | 86                          |  |
| SIG+FIT 50-75 y |                                                                     |             |      |      |                |                   |                   |            |                |           |                         |             |                  |               |                             |  |
| 10 y, 1 y       | 13,404                                                              | 2,079       | 0    | 0    | 1,012          | 1,267             | 11                | 2,289      | 12             | 15        | 4                       | 190         | 256              | 79            | 85                          |  |
| 10 y, 2 y       | 8,033                                                               | 2,192       | 0    | 0    | 792            | 1,098             | 15                | 1,905      | 11             | 19        | 6                       | 229         | 239              | 73            | 79                          |  |
| 5 y, 2 y        | 7,506                                                               | 3,611       | 0    | 0    | 949            | 1,163             | 13                | 2,125      | 11             | 17        | 5                       | 212         | 244              | 76            | 81                          |  |
| 5 y, 3 y        | 5,559                                                               | 3,780       | 0    | 0    | 880            | 1,089             | 15                | 1,984      | 11             | 19        | 6                       | 228         | 235              | 73            | 78                          |  |
| SIG+FIT 50-80 y |                                                                     |             |      |      |                |                   |                   |            |                |           |                         |             |                  |               |                             |  |
| 10 y, 1 y       | 14,812                                                              | 2,307       | 0    | 0    | 1,120          | 1,300             | 8                 | 2,428      | 13             | 13        | 3                       | 184         | 261              | 82            | 88                          |  |
| 10 y, 2 y       | 9,098                                                               | 2,500       | 0    | 0    | 903            | 1,139             | 11                | 2,053      | 12             | 17        | 4                       | 222         | 246              | 77            | 84                          |  |
| 5 y, 2 y        | 8,405                                                               | 3,922       | 0    | 0    | 1,044          | 1,193             | 10                | 2,248      | 13             | 15        | 4                       | 207         | 249              | 79            | 85                          |  |
| 5 y, 3 y        | 6,144                                                               | 4,108       | 0    | 0    | 961            | 1,116             | 13                | 2,090      | 12             | 18        | 5                       | 224         | 239              | 75            | 81                          |  |
| SIG+FIT 50-85 y |                                                                     |             |      |      |                |                   |                   |            |                |           |                         |             |                  |               |                             |  |
| 10 y, 1 y       | 15,814                                                              | 2,389       | 0    | 0    | 1,183          | 1,313             | 7                 | 2,502      | 14             | 12        | 3                       | 184         | 263              | 83            | 89                          |  |
| 10 y, 2 y       | 9,591                                                               | 2,544       | 0    | 0    | 937            | 1,147             | 10                | 2,094      | 13             | 16        | 4                       | 221         | 248              | 78            | 85                          |  |
| 5 y, 2 y        | 8,906                                                               | 4,138       | 0    | 0    | 1,103          | 1,205             | 9                 | 2,317      | 13             | 15        | 4                       | 206         | 251              | 80            | 86                          |  |
| 5 y, 3 y        | 6,516                                                               | 4,338       | 0    | 0    | 1,016          | 1,129             | 11                | 2,157      | 13             | 17        | 5                       | 223         | 241              | 77            | 83                          |  |
| SIG+FIT 55-75 y |                                                                     |             |      |      |                |                   |                   |            |                |           |                         |             |                  |               |                             |  |
| 10 y, 1 y       | 10,606                                                              | 1,808       | 0    | 0    | 868            | 1,105             | 13                | 1,986      | 12             | 18        | 5                       | 244         | 230              | 75            | 81                          |  |
| 10 y, 2 y       | 6,569                                                               | 1,961       | 0    | 0    | 710            | 970               | 16                | 1,697      | 11             | 22        | 6                       | 274         | 217              | 70            | 77                          |  |
| 5 y, 2 y        | 6,100                                                               | 2,945       | 0    | 0    | 808            | 1,014             | 16                | 1,838      | 11             | 21        | 6                       | 264         | 219              | 71            | 77                          |  |
| 5 y, 3 y        | 4,355                                                               | 3,077       | 0    | 0    | 738            | 944               | 18                | 1,700      | 10             | 23        | 7                       | 279         | 209              | 68            | 74                          |  |
| SIG+FIT 55-80 y |                                                                     |             |      |      |                |                   |                   |            |                |           |                         |             |                  |               |                             |  |
| 10 y, 1 y       | 12,010                                                              | 1,898       | 0    | 0    | 952            | 1,131             | 11                | 2,094      | 13             | 16        | 4                       | 240         | 234              | 77            | 84                          |  |
| 10 y, 2 y       | 7,255                                                               | 2,005       | 0    | 0    | 756            | 989               | 14                | 1,759      | 11             | 20        | 6                       | 272         | 220              | 72            | 78                          |  |
| 5 y, 2 y        | 6,780                                                               | 3,254       | 0    | 0    | 891            | 1,041             | 13                | 1,945      | 12             | 19        | 5                       | 259         | 223              | 74            | 80                          |  |

**eTable 9c. Outcomes with SIG+FIT screening strategies that vary by the ages to begin and end screening and screening interval: CRC-SPIN (continued).**

| Strategy<br>Modality, age to begin-end<br>Screening intervals <sup>a</sup> | Outcomes per 1,000 persons free of diagnosed cancer at age 40 years |       |      |      |           |              |          |       |         |       |                     |         |                  | Reductions <sup>c</sup> (%) |           |
|----------------------------------------------------------------------------|---------------------------------------------------------------------|-------|------|------|-----------|--------------|----------|-------|---------|-------|---------------------|---------|------------------|-----------------------------|-----------|
|                                                                            | Screening tests                                                     |       |      |      | Follow-up | Surveillance | COLs for | Total | Compli- | CRC   | CRC                 | LY with | LYG <sup>c</sup> | CRC                         | CRC       |
|                                                                            | Stool<br>tests                                                      | SIGs  | CTCs | COLs | COLs      | COLs         | symptoms | COLs  | cations | cases | deaths <sup>b</sup> | CRC     | LYG <sup>c</sup> | incidence                   | mortality |
| SIG+FIT 55-80 y (continued)                                                |                                                                     |       |      |      |           |              |          |       |         |       |                     |         |                  |                             |           |
| 5 y, 3 y                                                                   | 5,033                                                               | 3,409 | 0    | 0    | 826       | 977          | 15       | 1,818 | 12      | 21    | 6                   | 273     | 215              | 71                          | 77        |
| SIG+FIT 55-85 y                                                            |                                                                     |       |      |      |           |              |          |       |         |       |                     |         |                  |                             |           |
| 10 y, 1 y                                                                  | 13,025                                                              | 2,056 | 0    | 0    | 1,030     | 1,144        | 9        | 2,183 | 14      | 15    | 4                   | 239     | 236              | 79                          | 85        |
| 10 y, 2 y                                                                  | 8,023                                                               | 2,217 | 0    | 0    | 835       | 1,003        | 12       | 1,850 | 13      | 19    | 5                   | 272     | 223              | 73                          | 81        |
| 5 y, 2 y                                                                   | 7,427                                                               | 3,468 | 0    | 0    | 959       | 1,055        | 12       | 2,025 | 13      | 18    | 5                   | 258     | 226              | 75                          | 82        |
| 5 y, 3 y                                                                   | 5,451                                                               | 3,634 | 0    | 0    | 884       | 988          | 14       | 1,886 | 13      | 20    | 6                   | 272     | 216              | 72                          | 79        |

COL indicates colonoscopy; CRC, colorectal cancer; CRC-SPIN, CRC Simulated Population Model for Incidence and Natural History; CTC, computed tomographic colonography; FIT, fecal immunochemical test with a positivity cutoff of  $\geq 100$  ng of hemoglobin (Hb) per mL of buffer ( $\geq 20$   $\mu$ g Hb/g of feces); LY, life-years; LYG, LY gained compared with no screening; SIG, flexible sigmoidoscopy.

<sup>a</sup> The first interval listed is for SIG and the second interval listed is for FIT.

<sup>b</sup> Including deaths from complications of screening.

<sup>c</sup> Compared with no screening.

**eTable 10a.** Outcomes with CTC screening strategies that vary by the ages to begin and end screening and screening interval: **SimCRC**.

| Strategy<br>Modality, age to begin-end<br>Screening interval | Outcomes per 1,000 persons free of diagnosed cancer at age 40 years |      |       |      |                        |       |                   |            |                |           |                         |             |                  |               | Reductions <sup>b</sup> (%) |  |
|--------------------------------------------------------------|---------------------------------------------------------------------|------|-------|------|------------------------|-------|-------------------|------------|----------------|-----------|-------------------------|-------------|------------------|---------------|-----------------------------|--|
|                                                              | Screening tests                                                     |      |       |      | Follow-up Surveillance |       | COLs for symptoms | Total COLs | Compli-cations | CRC cases | CRC deaths <sup>a</sup> | LY with CRC | LYG <sup>b</sup> | CRC incidence | CRC mortality               |  |
|                                                              | Stool tests                                                         | SIGs | CTCs  | COLs | COLs                   | COLs  |                   |            |                |           |                         |             |                  |               |                             |  |
| No screening                                                 | 0                                                                   | 0    | 0     | 0    | 0                      | 0     | 70                | 70         | 2              | 70        | 28                      | 608         | 0                | 0             | 0                           |  |
| CTC 45-75 y                                                  |                                                                     |      |       |      |                        |       |                   |            |                |           |                         |             |                  |               |                             |  |
| 5 y                                                          | 0                                                                   | 0    | 4,879 | 0    | 860                    | 1,267 | 6                 | 2,133      | 11             | 13        | 3                       | 202         | 290              | 81            | 88                          |  |
| 10 y                                                         | 0                                                                   | 0    | 3,167 | 0    | 633                    | 1,056 | 9                 | 1,698      | 10             | 19        | 5                       | 266         | 267              | 73            | 82                          |  |
| CTC 45-80 y                                                  |                                                                     |      |       |      |                        |       |                   |            |                |           |                         |             |                  |               |                             |  |
| 5 y                                                          | 0                                                                   | 0    | 5,214 | 0    | 927                    | 1,295 | 4                 | 2,226      | 12             | 12        | 3                       | 201         | 293              | 82            | 90                          |  |
| 10 y                                                         | 0                                                                   | 0    | 3,167 | 0    | 633                    | 1,056 | 9                 | 1,698      | 10             | 19        | 5                       | 266         | 267              | 73            | 82                          |  |
| CTC 45-85 y                                                  |                                                                     |      |       |      |                        |       |                   |            |                |           |                         |             |                  |               |                             |  |
| 5 y                                                          | 0                                                                   | 0    | 5,436 | 0    | 971                    | 1,309 | 4                 | 2,284      | 13             | 12        | 3                       | 202         | 293              | 83            | 90                          |  |
| 10 y                                                         | 0                                                                   | 0    | 3,444 | 0    | 703                    | 1,085 | 7                 | 1,795      | 12             | 19        | 5                       | 268         | 269              | 74            | 84                          |  |
| CTC 50-75 y                                                  |                                                                     |      |       |      |                        |       |                   |            |                |           |                         |             |                  |               |                             |  |
| 5 y                                                          | 0                                                                   | 0    | 4,069 | 0    | 758                    | 1,161 | 8                 | 1,927      | 11             | 16        | 4                       | 254         | 265              | 77            | 85                          |  |
| 10 y                                                         | 0                                                                   | 0    | 2,458 | 0    | 512                    | 934   | 14                | 1,460      | 9              | 23        | 7                       | 308         | 239              | 67            | 75                          |  |
| CTC 50-80 y                                                  |                                                                     |      |       |      |                        |       |                   |            |                |           |                         |             |                  |               |                             |  |
| 5 y                                                          | 0                                                                   | 0    | 4,405 | 0    | 825                    | 1,189 | 6                 | 2,021      | 12             | 15        | 4                       | 253         | 267              | 78            | 86                          |  |
| 10 y                                                         | 0                                                                   | 0    | 2,874 | 0    | 617                    | 989   | 10                | 1,615      | 11             | 21        | 6                       | 308         | 245              | 70            | 80                          |  |
| CTC 50-85 y                                                  |                                                                     |      |       |      |                        |       |                   |            |                |           |                         |             |                  |               |                             |  |
| 5 y                                                          | 0                                                                   | 0    | 4,627 | 0    | 870                    | 1,203 | 6                 | 2,079      | 13             | 15        | 4                       | 253         | 268              | 79            | 87                          |  |
| 10 y                                                         | 0                                                                   | 0    | 2,874 | 0    | 617                    | 989   | 10                | 1,615      | 11             | 21        | 6                       | 308         | 245              | 70            | 80                          |  |
| CTC 55-75 y                                                  |                                                                     |      |       |      |                        |       |                   |            |                |           |                         |             |                  |               |                             |  |
| 5 y                                                          | 0                                                                   | 0    | 3,295 | 0    | 658                    | 1,025 | 11                | 1,694      | 11             | 21        | 6                       | 321         | 231              | 71            | 79                          |  |
| 10 y                                                         | 0                                                                   | 0    | 2,250 | 0    | 512                    | 870   | 14                | 1,396      | 10             | 25        | 7                       | 362         | 214              | 64            | 74                          |  |
| CTC 55-80 y                                                  |                                                                     |      |       |      |                        |       |                   |            |                |           |                         |             |                  |               |                             |  |
| 5 y                                                          | 0                                                                   | 0    | 3,631 | 0    | 726                    | 1,054 | 9                 | 1,788      | 12             | 19        | 5                       | 319         | 233              | 72            | 81                          |  |
| 10 y                                                         | 0                                                                   | 0    | 2,250 | 0    | 512                    | 870   | 14                | 1,396      | 10             | 25        | 7                       | 362         | 214              | 64            | 74                          |  |
| CTC 55-85 y                                                  |                                                                     |      |       |      |                        |       |                   |            |                |           |                         |             |                  |               |                             |  |
| 5 y                                                          | 0                                                                   | 0    | 3,854 | 0    | 770                    | 1,068 | 9                 | 1,847      | 13             | 19        | 5                       | 320         | 234              | 72            | 81                          |  |
| 10 y                                                         | 0                                                                   | 0    | 2,528 | 0    | 583                    | 899   | 12                | 1,494      | 12             | 25        | 7                       | 365         | 216              | 65            | 76                          |  |

COL indicates colonoscopy; CRC, colorectal cancer; CTC, computed tomographic colonography; LY, life-years; LYG, LY gained compared with no screening; SIG, flexible sigmoidoscopy; SimCRC, Simulation Model of CRC.

<sup>a</sup> Including deaths from complications of screening.

<sup>b</sup> Compared with no screening.



**eTable 10b.** Outcomes with CTC screening strategies that vary by the ages to begin and end screening and screening interval: **MISCAN**.

| Strategy<br>Modality, age to begin-end<br>Screening interval | Outcomes per 1,000 persons free of diagnosed cancer at age 40 years |      |       |      |                        |       |                   |            |                |           |                         |             |                  |               | Reductions <sup>b</sup> (%) |  |
|--------------------------------------------------------------|---------------------------------------------------------------------|------|-------|------|------------------------|-------|-------------------|------------|----------------|-----------|-------------------------|-------------|------------------|---------------|-----------------------------|--|
|                                                              | Screening tests                                                     |      |       |      | Follow-up Surveillance |       | COLs for symptoms | Total COLs | Compli-cations | CRC cases | CRC deaths <sup>a</sup> | LY with CRC | LYG <sup>b</sup> | CRC incidence | CRC mortality               |  |
|                                                              | Stool tests                                                         | SIGs | CTCs  | COLs | COLs                   | COLs  |                   |            |                |           |                         |             |                  |               |                             |  |
| No screening                                                 | 0                                                                   | 0    | 0     | 0    | 0                      | 0     | 67                | 67         | 1              | 67        | 28                      | 565         | 0                | 0             | 0                           |  |
| CTC 45-75 y                                                  |                                                                     |      |       |      |                        |       |                   |            |                |           |                         |             |                  |               |                             |  |
| 5 y                                                          | 0                                                                   | 0    | 4,990 | 0    | 788                    | 1,130 | 15                | 1,933      | 10             | 32        | 7                       | 428         | 239              | 53            | 73                          |  |
| 10 y                                                         | 0                                                                   | 0    | 3,211 | 0    | 561                    | 896   | 21                | 1,478      | 9              | 39        | 10                      | 490         | 197              | 42            | 63                          |  |
| CTC 45-80 y                                                  |                                                                     |      |       |      |                        |       |                   |            |                |           |                         |             |                  |               |                             |  |
| 5 y                                                          | 0                                                                   | 0    | 5,357 | 0    | 846                    | 1,148 | 12                | 2,006      | 11             | 30        | 7                       | 429         | 244              | 54            | 76                          |  |
| 10 y                                                         | 0                                                                   | 0    | 3,211 | 0    | 561                    | 896   | 21                | 1,478      | 9              | 39        | 10                      | 490         | 197              | 42            | 63                          |  |
| CTC 45-85 y                                                  |                                                                     |      |       |      |                        |       |                   |            |                |           |                         |             |                  |               |                             |  |
| 5 y                                                          | 0                                                                   | 0    | 5,609 | 0    | 885                    | 1,156 | 11                | 2,052      | 12             | 30        | 6                       | 431         | 245              | 55            | 78                          |  |
| 10 y                                                         | 0                                                                   | 0    | 3,515 | 0    | 617                    | 913   | 18                | 1,548      | 10             | 39        | 10                      | 497         | 200              | 42            | 65                          |  |
| CTC 50-75 y                                                  |                                                                     |      |       |      |                        |       |                   |            |                |           |                         |             |                  |               |                             |  |
| 5 y                                                          | 0                                                                   | 0    | 4,171 | 0    | 690                    | 1,037 | 16                | 1,743      | 10             | 33        | 8                       | 443         | 226              | 51            | 72                          |  |
| 10 y                                                         | 0                                                                   | 0    | 2,485 | 0    | 456                    | 812   | 26                | 1,293      | 8              | 41        | 12                      | 496         | 184              | 39            | 58                          |  |
| CTC 50-80 y                                                  |                                                                     |      |       |      |                        |       |                   |            |                |           |                         |             |                  |               |                             |  |
| 5 y                                                          | 0                                                                   | 0    | 4,539 | 0    | 747                    | 1,056 | 13                | 1,817      | 11             | 32        | 7                       | 445         | 230              | 53            | 75                          |  |
| 10 y                                                         | 0                                                                   | 0    | 2,927 | 0    | 538                    | 847   | 20                | 1,405      | 9              | 39        | 10                      | 505         | 194              | 41            | 65                          |  |
| CTC 50-85 y                                                  |                                                                     |      |       |      |                        |       |                   |            |                |           |                         |             |                  |               |                             |  |
| 5 y                                                          | 0                                                                   | 0    | 4,792 | 0    | 787                    | 1,065 | 12                | 1,864      | 11             | 31        | 7                       | 446         | 231              | 53            | 76                          |  |
| 10 y                                                         | 0                                                                   | 0    | 2,927 | 0    | 538                    | 847   | 20                | 1,405      | 9              | 39        | 10                      | 505         | 194              | 41            | 65                          |  |
| CTC 55-75 y                                                  |                                                                     |      |       |      |                        |       |                   |            |                |           |                         |             |                  |               |                             |  |
| 5 y                                                          | 0                                                                   | 0    | 3,388 | 0    | 594                    | 911   | 18                | 1,523      | 10             | 35        | 9                       | 466         | 204              | 48            | 68                          |  |
| 10 y                                                         | 0                                                                   | 0    | 2,284 | 0    | 446                    | 750   | 24                | 1,220      | 9              | 41        | 11                      | 511         | 172              | 39            | 59                          |  |
| CTC 55-80 y                                                  |                                                                     |      |       |      |                        |       |                   |            |                |           |                         |             |                  |               |                             |  |
| 5 y                                                          | 0                                                                   | 0    | 3,759 | 0    | 653                    | 930   | 15                | 1,598      | 11             | 33        | 8                       | 467         | 208              | 50            | 71                          |  |
| 10 y                                                         | 0                                                                   | 0    | 2,284 | 0    | 446                    | 750   | 24                | 1,220      | 9              | 41        | 11                      | 511         | 172              | 39            | 59                          |  |
| CTC 55-85 y                                                  |                                                                     |      |       |      |                        |       |                   |            |                |           |                         |             |                  |               |                             |  |
| 5 y                                                          | 0                                                                   | 0    | 4,014 | 0    | 692                    | 939   | 14                | 1,646      | 11             | 33        | 8                       | 468         | 209              | 50            | 72                          |  |
| 10 y                                                         | 0                                                                   | 0    | 2,590 | 0    | 503                    | 768   | 21                | 1,292      | 10             | 41        | 11                      | 518         | 175              | 39            | 62                          |  |

COL indicates colonoscopy; CRC, colorectal cancer; CTC, computed tomographic colonography; LY, life-years; LYG, LY gained compared with no screening; MISCAN, Microsimulation Screening Analysis; SIG, flexible sigmoidoscopy.

<sup>a</sup> Including deaths from complications of screening.

<sup>b</sup> Compared with no screening.

**eTable 10c.** Outcomes with CTC screening strategies that vary by the ages to begin and end screening and screening interval: **CRC-SPIN**.

| Strategy     | Outcomes per 1,000 persons free of diagnosed cancer at age 40 years |             |       |      |                            |                   |            |                |           |                         |             |                  |               |               | Reductions <sup>b</sup> (%) |  |
|--------------|---------------------------------------------------------------------|-------------|-------|------|----------------------------|-------------------|------------|----------------|-----------|-------------------------|-------------|------------------|---------------|---------------|-----------------------------|--|
|              | Screening tests                                                     |             |       |      | Follow-up Surveilance COLs | COLs for symptoms | Total COLs | Compli-cations | CRC cases | CRC deaths <sup>a</sup> | LY with CRC | LYG <sup>b</sup> | CRC incidence | CRC mortality |                             |  |
|              | Modality, age to begin-end Screening interval                       | Stool tests | SIGs  | CTCs |                            |                   |            |                |           |                         |             |                  |               |               | COLs                        |  |
| No screening | 0                                                                   | 0           | 0     | 0    | 0                          | 0                 | 72         | 72             | 2         | 72                      | 27          | 610              | 0             | 0             | 0                           |  |
| CTC 45-75 y  |                                                                     |             |       |      |                            |                   |            |                |           |                         |             |                  |               |               |                             |  |
| 5 y          | 0                                                                   | 0           | 5,106 | 0    | 769                        | 1,027             | 11         | 1,807          | 10        | 14                      | 4           | 142              | 264           | 81            | 84                          |  |
| 10 y         | 0                                                                   | 0           | 3,239 | 0    | 569                        | 905               | 15         | 1,488          | 10        | 18                      | 6           | 186              | 244           | 75            | 79                          |  |
| CTC 45-80 y  |                                                                     |             |       |      |                            |                   |            |                |           |                         |             |                  |               |               |                             |  |
| 5 y          | 0                                                                   | 0           | 5,491 | 0    | 832                        | 1,052             | 9          | 1,892          | 11        | 12                      | 3           | 136              | 268           | 84            | 87                          |  |
| 10 y         | 0                                                                   | 0           | 3,239 | 0    | 569                        | 905               | 15         | 1,488          | 10        | 18                      | 6           | 186              | 244           | 75            | 79                          |  |
| CTC 45-85 y  |                                                                     |             |       |      |                            |                   |            |                |           |                         |             |                  |               |               |                             |  |
| 5 y          | 0                                                                   | 0           | 5,753 | 0    | 875                        | 1,065             | 7          | 1,948          | 12        | 11                      | 3           | 134              | 269           | 85            | 89                          |  |
| 10 y         | 0                                                                   | 0           | 3,545 | 0    | 636                        | 932               | 12         | 1,579          | 12        | 16                      | 5           | 181              | 247           | 78            | 83                          |  |
| CTC 50-75 y  |                                                                     |             |       |      |                            |                   |            |                |           |                         |             |                  |               |               |                             |  |
| 5 y          | 0                                                                   | 0           | 4,254 | 0    | 674                        | 967               | 13         | 1,654          | 10        | 16                      | 5           | 176              | 248           | 78            | 82                          |  |
| 10 y         | 0                                                                   | 0           | 2,500 | 0    | 460                        | 825               | 19         | 1,304          | 9         | 22                      | 7           | 223              | 224           | 69            | 73                          |  |
| CTC 50-80 y  |                                                                     |             |       |      |                            |                   |            |                |           |                         |             |                  |               |               |                             |  |
| 5 y          | 0                                                                   | 0           | 4,638 | 0    | 737                        | 992               | 10         | 1,739          | 11        | 13                      | 4           | 169              | 252           | 81            | 85                          |  |
| 10 y         | 0                                                                   | 0           | 2,948 | 0    | 555                        | 874               | 14         | 1,442          | 11        | 18                      | 5           | 210              | 234           | 76            | 80                          |  |
| CTC 50-85 y  |                                                                     |             |       |      |                            |                   |            |                |           |                         |             |                  |               |               |                             |  |
| 5 y          | 0                                                                   | 0           | 4,900 | 0    | 781                        | 1,006             | 9          | 1,795          | 12        | 13                      | 4           | 168              | 254           | 83            | 87                          |  |
| 10 y         | 0                                                                   | 0           | 2,948 | 0    | 555                        | 874               | 14         | 1,442          | 11        | 18                      | 5           | 210              | 234           | 76            | 80                          |  |
| CTC 55-75 y  |                                                                     |             |       |      |                            |                   |            |                |           |                         |             |                  |               |               |                             |  |
| 5 y          | 0                                                                   | 0           | 3,438 | 0    | 583                        | 877               | 15         | 1,475          | 10        | 18                      | 6           | 225              | 224           | 74            | 78                          |  |
| 10 y         | 0                                                                   | 0           | 2,296 | 0    | 459                        | 788               | 18         | 1,265          | 9         | 22                      | 7           | 255              | 209           | 70            | 74                          |  |
| CTC 55-80 y  |                                                                     |             |       |      |                            |                   |            |                |           |                         |             |                  |               |               |                             |  |
| 5 y          | 0                                                                   | 0           | 3,822 | 0    | 646                        | 902               | 13         | 1,560          | 11        | 16                      | 5           | 220              | 228           | 77            | 81                          |  |
| 10 y         | 0                                                                   | 0           | 2,296 | 0    | 459                        | 788               | 18         | 1,265          | 9         | 22                      | 7           | 255              | 209           | 70            | 74                          |  |
| CTC 55-85 y  |                                                                     |             |       |      |                            |                   |            |                |           |                         |             |                  |               |               |                             |  |
| 5 y          | 0                                                                   | 0           | 4,084 | 0    | 689                        | 915               | 11         | 1,616          | 12        | 15                      | 5           | 217              | 230           | 79            | 83                          |  |
| 10 y         | 0                                                                   | 0           | 2,602 | 0    | 525                        | 815               | 15         | 1,356          | 11        | 19                      | 6           | 252              | 212           | 73            | 77                          |  |

COL indicates colonoscopy; CRC, colorectal cancer; CRC-SPIN, CRC Simulated Population Model for Incidence and Natural History; CTC, computed tomographic colonography; LY, life-years; LYG, LY gained compared with no screening; SIG, flexible sigmoidoscopy.

<sup>a</sup> Including deaths from complications of screening.

<sup>b</sup> Compared with no screening.

**eTable 11.** Outcomes and efficiency ratios for stool-based screening strategies<sup>a</sup> with an age to begin screening of 50 or 55 years. Strategies are ordered by the number of colonoscopies required.

| Model/strategy   | Outcomes per 1,000 40-year-olds                     |             |      |       |      |     |               |                    |      | Efficiency ratio <sup>b</sup><br>(ΔCOL/ΔLYG) |
|------------------|-----------------------------------------------------|-------------|------|-------|------|-----|---------------|--------------------|------|----------------------------------------------|
|                  | Modality, age to begin-age to end (y), interval (y) | Stool tests | SIGs | CTCs  | COLs | LYG | Complications | CRC deaths averted | ΔCOL |                                              |
| <b>SimCRC</b>    |                                                     |             |      |       |      |     |               |                    |      |                                              |
| FIT 55-75, 3     | 5,306                                               | 0           | 0    | 807   | 178  | 6   | 16            | —                  | —    | —                                            |
| FIT 55-80, 3     | 6,258                                               | 0           | 0    | 907   | 190  | 7   | 18            | ND                 | ND   | Dominated <sup>W</sup>                       |
| FIT 55-85, 3     | 6,837                                               | 0           | 0    | 965   | 193  | 8   | 19            | ND                 | ND   | Dominated <sup>W</sup>                       |
| FIT 50-75, 3     | 6,887                                               | 0           | 0    | 971   | 212  | 6   | 18            | 164                | 34   | 5                                            |
| HSgFOBT 55-75, 3 | 5,014                                               | 0           | 0    | 1,052 | 178  | 7   | 16            | ND                 | ND   | Dominated <sup>S</sup>                       |
| FIT 55-75, 2     | 7,616                                               | 0           | 0    | 1,053 | 204  | 7   | 19            | ND                 | ND   | Dominated <sup>S</sup>                       |
| FIT 50-80, 3     | 7,694                                               | 0           | 0    | 1,055 | 220  | 8   | 20            | 84                 | 9    | 10                                           |
| FIT 50-85, 3     | 8,111                                               | 0           | 0    | 1,095 | 223  | 8   | 20            | 39                 | 2    | 17 <sup>c</sup>                              |
| FIT 55-80, 2     | 8,455                                               | 0           | 0    | 1,131 | 210  | 8   | 20            | ND                 | ND   | Dominated <sup>S</sup>                       |
| FIT-DNA 55-75, 5 | 3,576                                               | 0           | 0    | 1,171 | 194  | 8   | 18            | ND                 | ND   | Dominated <sup>S</sup>                       |
| HSgFOBT 55-80, 3 | 5,872                                               | 0           | 0    | 1,177 | 188  | 8   | 18            | ND                 | ND   | Dominated <sup>S</sup>                       |
| FIT 55-85, 2     | 9,350                                               | 0           | 0    | 1,208 | 214  | 10  | 21            | ND                 | ND   | Dominated <sup>S</sup>                       |
| FIT 50-75, 2     | 9,326                                               | 0           | 0    | 1,215 | 234  | 7   | 20            | 160                | 14   | 12                                           |
| HSgFOBT 55-85, 3 | 6,352                                               | 0           | 0    | 1,244 | 191  | 9   | 19            | ND                 | ND   | Dominated <sup>S</sup>                       |
| FIT-DNA 55-80, 5 | 3,970                                               | 0           | 0    | 1,255 | 199  | 9   | 19            | ND                 | ND   | Dominated <sup>S</sup>                       |
| HSgFOBT 50-75, 3 | 6,456                                               | 0           | 0    | 1,286 | 212  | 7   | 18            | ND                 | ND   | Dominated <sup>S</sup>                       |
| FIT-DNA 55-85, 5 | 4,233                                               | 0           | 0    | 1,310 | 200  | 10  | 20            | ND                 | ND   | Dominated <sup>S</sup>                       |
| FIT 50-80, 2     | 10,572                                              | 0           | 0    | 1,327 | 243  | 9   | 22            | 112                | 9    | 13                                           |
| HSgFOBT 55-75, 2 | 6,897                                               | 0           | 0    | 1,364 | 204  | 8   | 19            | ND                 | ND   | Dominated <sup>S</sup>                       |
| FIT-DNA 50-75, 5 | 4,391                                               | 0           | 0    | 1,364 | 224  | 8   | 20            | ND                 | ND   | Dominated <sup>S</sup>                       |
| FIT 50-85, 2     | 11,165                                              | 0           | 0    | 1,377 | 245  | 10  | 22            | 50                 | 2    | 24 <sup>c</sup>                              |
| HSgFOBT 50-80, 3 | 7,125                                               | 0           | 0    | 1,383 | 220  | 9   | 20            | ND                 | ND   | Dominated <sup>S</sup>                       |
| FIT-DNA 55-75, 3 | 4,668                                               | 0           | 0    | 1,415 | 214  | 9   | 20            | ND                 | ND   | Dominated <sup>S</sup>                       |
| HSgFOBT 50-85, 3 | 7,565                                               | 0           | 0    | 1,441 | 222  | 9   | 20            | ND                 | ND   | Dominated <sup>S</sup>                       |
| FIT-DNA 50-80, 5 | 4,781                                               | 0           | 0    | 1,447 | 229  | 9   | 21            | ND                 | ND   | Dominated <sup>S</sup>                       |
| HSgFOBT 55-80, 2 | 7,622                                               | 0           | 0    | 1,461 | 209  | 9   | 20            | ND                 | ND   | Dominated <sup>S</sup>                       |
| FIT 55-75, 1     | 12,502                                              | 0           | 0    | 1,478 | 226  | 9   | 21            | ND                 | ND   | Dominated <sup>S</sup>                       |
| FIT-DNA 50-85, 5 | 5,043                                               | 0           | 0    | 1,500 | 230  | 10  | 21            | ND                 | ND   | Dominated <sup>S</sup>                       |
| HSgFOBT 55-85, 2 | 8,390                                               | 0           | 0    | 1,558 | 212  | 11  | 21            | ND                 | ND   | Dominated <sup>S</sup>                       |
| FIT-DNA 55-80, 3 | 5,410                                               | 0           | 0    | 1,561 | 222  | 10  | 21            | ND                 | ND   | Dominated <sup>S</sup>                       |
| HSgFOBT 50-75, 2 | 8,388                                               | 0           | 0    | 1,597 | 235  | 9   | 20            | ND                 | ND   | Dominated <sup>S</sup>                       |
| FIT 55-80, 1     | 14,163                                              | 0           | 0    | 1,599 | 231  | 11  | 22            | ND                 | ND   | Dominated <sup>S</sup>                       |
| FIT-DNA 55-85, 3 | 5,801                                               | 0           | 0    | 1,634 | 223  | 11  | 22            | ND                 | ND   | Dominated <sup>S</sup>                       |
| FIT 55-85, 1     | 15,332                                              | 0           | 0    | 1,679 | 233  | 12  | 23            | ND                 | ND   | Dominated <sup>S</sup>                       |
| FIT-DNA 50-75, 3 | 5,990                                               | 0           | 0    | 1,701 | 250  | 9   | 22            | ND                 | ND   | Dominated <sup>W</sup>                       |
| HSgFOBT 50-80, 2 | 9,462                                               | 0           | 0    | 1,738 | 243  | 10  | 22            | ND                 | ND   | Dominated <sup>S</sup>                       |
| FIT 50-75, 1     | 15,778                                              | 0           | 0    | 1,739 | 260  | 10  | 23            | 413                | 17   | 24 <sup>c</sup>                              |
| HSgFOBT 50-85, 2 | 9,970                                               | 0           | 0    | 1,801 | 245  | 11  | 22            | ND                 | ND   | Dominated <sup>S</sup>                       |
| FIT-DNA 50-80, 3 | 6,543                                               | 0           | 0    | 1,809 | 255  | 10  | 23            | ND                 | ND   | Dominated <sup>S</sup>                       |
| FIT 50-80, 1     | 17,426                                              | 0           | 0    | 1,858 | 265  | 11  | 24            | 531                | 22   | 24                                           |
| HSgFOBT 55-75, 1 | 10,357                                              | 0           | 0    | 1,876 | 226  | 10  | 21            | ND                 | ND   | Dominated <sup>S</sup>                       |
| FIT-DNA 50-85, 3 | 6,961                                               | 0           | 0    | 1,884 | 257  | 11  | 23            | ND                 | ND   | Dominated <sup>S</sup>                       |
| FIT 50-85, 1     | 18,589                                              | 0           | 0    | 1,937 | 267  | 12  | 24            | 79                 | 2    | 50                                           |
| HSgFOBT 55-80, 1 | 11,637                                              | 0           | 0    | 2,025 | 231  | 12  | 22            | ND                 | ND   | Dominated <sup>S</sup>                       |
| HSgFOBT 55-85, 1 | 12,539                                              | 0           | 0    | 2,125 | 232  | 13  | 23            | ND                 | ND   | Dominated <sup>S</sup>                       |
| FIT-DNA 55-75, 1 | 8,846                                               | 0           | 0    | 2,206 | 237  | 11  | 22            | ND                 | ND   | Dominated <sup>S</sup>                       |
| HSgFOBT 50-75, 1 | 12,914                                              | 0           | 0    | 2,230 | 261  | 11  | 23            | ND                 | ND   | Dominated <sup>S</sup>                       |
| FIT-DNA 55-80, 1 | 9,880                                               | 0           | 0    | 2,367 | 240  | 13  | 23            | ND                 | ND   | Dominated <sup>S</sup>                       |
| HSgFOBT 50-80, 1 | 14,193                                              | 0           | 0    | 2,377 | 265  | 12  | 24            | ND                 | ND   | Dominated <sup>S</sup>                       |
| FIT-DNA 55-85, 1 | 10,618                                              | 0           | 0    | 2,475 | 241  | 14  | 23            | ND                 | ND   | Dominated <sup>S</sup>                       |
| HSgFOBT 50-85, 1 | 15,090                                              | 0           | 0    | 2,476 | 266  | 13  | 24            | ND                 | ND   | Dominated <sup>S</sup>                       |
| FIT-DNA 50-75, 1 | 11,041                                              | 0           | 0    | 2,601 | 271  | 12  | 24            | 664                | 4    | 155 <sup>c</sup>                             |
| FIT-DNA 50-80, 1 | 12,096                                              | 0           | 0    | 2,763 | 274  | 13  | 25            | 826                | 7    | 112                                          |
| FIT-DNA 50-85, 1 | 12,826                                              | 0           | 0    | 2,870 | 275  | 14  | 25            | 107                | 1    | 116                                          |

**eTable 11.** Outcomes and efficiency ratios for stool-based screening strategies<sup>a</sup> with an age to begin screening of 50 or 55 years (continued).

| Model/strategy   | Outcomes per 1,000 40-year-olds                     |             |      |       |      |     |               |                    |      | Efficiency ratio <sup>b</sup><br>(ΔCOL/ΔLYG) |
|------------------|-----------------------------------------------------|-------------|------|-------|------|-----|---------------|--------------------|------|----------------------------------------------|
|                  | Modality, age to begin-age to end (y), interval (y) | Stool tests | SIGs | CTCs  | COLs | LYG | Complications | CRC deaths averted | ΔCOL |                                              |
| <b>MISCAN</b>    |                                                     |             |      |       |      |     |               |                    |      |                                              |
| FIT 55-75, 3     | 5,250                                               | 0           | 0    | 833   | 153  | 6   | 14            | —                  | —    | —                                            |
| FIT 55-80, 3     | 6,204                                               | 0           | 0    | 917   | 165  | 7   | 16            | 84                 | 11   | 7 <sup>c</sup>                               |
| FIT 55-85, 3     | 6,859                                               | 0           | 0    | 967   | 169  | 8   | 17            | 134                | 15   | 9 <sup>c</sup>                               |
| FIT 50-75, 3     | 6,795                                               | 0           | 0    | 995   | 176  | 7   | 15            | 162                | 23   | 7                                            |
| HSgFOBT 55-75, 3 | 4,912                                               | 0           | 0    | 1,059 | 152  | 7   | 14            | ND                 | ND   | Dominated <sup>S</sup>                       |
| FIT 50-80, 3     | 7,693                                               | 0           | 0    | 1,070 | 186  | 8   | 17            | 75                 | 10   | 8                                            |
| FIT 55-75, 2     | 7,644                                               | 0           | 0    | 1,075 | 179  | 8   | 16            | ND                 | ND   | Dominated <sup>S</sup>                       |
| FIT 50-85, 3     | 8,032                                               | 0           | 0    | 1,096 | 188  | 8   | 17            | 26                 | 2    | 12 <sup>c</sup>                              |
| FIT 55-80, 2     | 8,501                                               | 0           | 0    | 1,139 | 186  | 8   | 18            | ND                 | ND   | Dominated <sup>S</sup>                       |
| HSgFOBT 55-80, 3 | 5,773                                               | 0           | 0    | 1,170 | 163  | 8   | 16            | ND                 | ND   | Dominated <sup>S</sup>                       |
| FIT 55-85, 2     | 9,437                                               | 0           | 0    | 1,201 | 190  | 9   | 18            | ND                 | ND   | Dominated <sup>W</sup>                       |
| FIT-DNA 55-75, 5 | 3,574                                               | 0           | 0    | 1,203 | 172  | 8   | 16            | ND                 | ND   | Dominated <sup>S</sup>                       |
| HSgFOBT 55-85, 3 | 6,359                                               | 0           | 0    | 1,238 | 166  | 9   | 16            | ND                 | ND   | Dominated <sup>S</sup>                       |
| FIT 50-75, 2     | 9,342                                               | 0           | 0    | 1,243 | 200  | 8   | 17            | 173                | 15   | 12 <sup>c</sup>                              |
| FIT-DNA 55-80, 5 | 3,974                                               | 0           | 0    | 1,275 | 178  | 9   | 17            | ND                 | ND   | Dominated <sup>S</sup>                       |
| HSgFOBT 50-75, 3 | 6,302                                               | 0           | 0    | 1,296 | 175  | 8   | 15            | ND                 | ND   | Dominated <sup>S</sup>                       |
| FIT-DNA 55-85, 5 | 4,248                                               | 0           | 0    | 1,320 | 179  | 10  | 18            | ND                 | ND   | Dominated <sup>S</sup>                       |
| FIT 50-80, 2     | 10,613                                              | 0           | 0    | 1,334 | 210  | 9   | 19            | 264                | 24   | 11                                           |
| FIT 50-85, 2     | 11,233                                              | 0           | 0    | 1,375 | 213  | 9   | 19            | 40                 | 3    | 16                                           |
| HSgFOBT 55-75, 2 | 6,940                                               | 0           | 0    | 1,386 | 178  | 9   | 17            | ND                 | ND   | Dominated <sup>S</sup>                       |
| HSgFOBT 50-80, 3 | 7,106                                               | 0           | 0    | 1,395 | 184  | 9   | 17            | ND                 | ND   | Dominated <sup>S</sup>                       |
| FIT-DNA 50-75, 5 | 4,380                                               | 0           | 0    | 1,402 | 193  | 9   | 17            | ND                 | ND   | Dominated <sup>S</sup>                       |
| HSgFOBT 50-85, 3 | 7,408                                               | 0           | 0    | 1,430 | 186  | 9   | 17            | ND                 | ND   | Dominated <sup>S</sup>                       |
| FIT-DNA 55-75, 3 | 4,509                                               | 0           | 0    | 1,431 | 190  | 9   | 17            | ND                 | ND   | Dominated <sup>S</sup>                       |
| HSgFOBT 55-80, 2 | 7,678                                               | 0           | 0    | 1,472 | 184  | 9   | 18            | ND                 | ND   | Dominated <sup>S</sup>                       |
| FIT-DNA 50-80, 5 | 4,776                                               | 0           | 0    | 1,472 | 198  | 9   | 18            | ND                 | ND   | Dominated <sup>S</sup>                       |
| FIT 55-75, 1     | 12,586                                              | 0           | 0    | 1,490 | 206  | 9   | 19            | ND                 | ND   | Dominated <sup>S</sup>                       |
| FIT-DNA 50-85, 5 | 5,048                                               | 0           | 0    | 1,516 | 200  | 10  | 19            | ND                 | ND   | Dominated <sup>S</sup>                       |
| HSgFOBT 55-85, 2 | 8,478                                               | 0           | 0    | 1,557 | 188  | 11  | 18            | ND                 | ND   | Dominated <sup>S</sup>                       |
| FIT-DNA 55-80, 3 | 5,260                                               | 0           | 0    | 1,557 | 199  | 10  | 19            | ND                 | ND   | Dominated <sup>S</sup>                       |
| FIT 55-80, 1     | 14,313                                              | 0           | 0    | 1,592 | 213  | 10  | 20            | ND                 | ND   | Dominated <sup>W</sup>                       |
| FIT-DNA 55-85, 3 | 5,771                                               | 0           | 0    | 1,634 | 202  | 11  | 19            | ND                 | ND   | Dominated <sup>S</sup>                       |
| HSgFOBT 50-75, 2 | 8,408                                               | 0           | 0    | 1,636 | 200  | 9   | 18            | ND                 | ND   | Dominated <sup>S</sup>                       |
| FIT 55-85, 1     | 15,566                                              | 0           | 0    | 1,659 | 215  | 11  | 21            | ND                 | ND   | Dominated <sup>W</sup>                       |
| FIT-DNA 50-75, 3 | 5,779                                               | 0           | 0    | 1,714 | 215  | 9   | 19            | ND                 | ND   | Dominated <sup>S</sup>                       |
| FIT 50-75, 1     | 15,843                                              | 0           | 0    | 1,757 | 231  | 10  | 20            | 383                | 18   | 21 <sup>c</sup>                              |
| HSgFOBT 50-80, 2 | 9,497                                               | 0           | 0    | 1,759 | 209  | 10  | 19            | ND                 | ND   | Dominated <sup>S</sup>                       |
| HSgFOBT 50-85, 2 | 10,024                                              | 0           | 0    | 1,814 | 211  | 11  | 19            | ND                 | ND   | Dominated <sup>S</sup>                       |
| FIT-DNA 50-80, 3 | 6,481                                               | 0           | 0    | 1,828 | 223  | 11  | 20            | ND                 | ND   | Dominated <sup>S</sup>                       |
| FIT 50-80, 1     | 17,552                                              | 0           | 0    | 1,855 | 238  | 11  | 21            | 481                | 25   | 19                                           |
| FIT-DNA 50-85, 3 | 6,745                                               | 0           | 0    | 1,867 | 224  | 11  | 20            | ND                 | ND   | Dominated <sup>S</sup>                       |
| HSgFOBT 55-75, 1 | 10,427                                              | 0           | 0    | 1,913 | 206  | 11  | 19            | ND                 | ND   | Dominated <sup>S</sup>                       |
| FIT 50-85, 1     | 18,796                                              | 0           | 0    | 1,921 | 240  | 11  | 22            | 66                 | 2    | 27                                           |
| HSgFOBT 55-80, 1 | 11,733                                              | 0           | 0    | 2,047 | 212  | 12  | 20            | ND                 | ND   | Dominated <sup>S</sup>                       |
| HSgFOBT 55-85, 1 | 12,679                                              | 0           | 0    | 2,137 | 214  | 13  | 20            | ND                 | ND   | Dominated <sup>S</sup>                       |
| FIT-DNA 55-75, 1 | 8,874                                               | 0           | 0    | 2,252 | 221  | 12  | 20            | ND                 | ND   | Dominated <sup>S</sup>                       |
| HSgFOBT 50-75, 1 | 12,927                                              | 0           | 0    | 2,287 | 232  | 11  | 20            | ND                 | ND   | Dominated <sup>S</sup>                       |
| FIT-DNA 55-80, 1 | 9,943                                               | 0           | 0    | 2,394 | 226  | 13  | 21            | ND                 | ND   | Dominated <sup>S</sup>                       |
| HSgFOBT 50-80, 1 | 14,223                                              | 0           | 0    | 2,416 | 237  | 12  | 21            | ND                 | ND   | Dominated <sup>S</sup>                       |
| FIT-DNA 55-85, 1 | 10,733                                              | 0           | 0    | 2,493 | 227  | 14  | 21            | ND                 | ND   | Dominated <sup>S</sup>                       |
| HSgFOBT 50-85, 1 | 15,161                                              | 0           | 0    | 2,505 | 239  | 13  | 22            | ND                 | ND   | Dominated <sup>S</sup>                       |
| FIT-DNA 50-75, 1 | 11,025                                              | 0           | 0    | 2,662 | 246  | 12  | 21            | 741                | 6    | 120 <sup>c</sup>                             |
| FIT-DNA 50-80, 1 | 12,108                                              | 0           | 0    | 2,804 | 250  | 13  | 22            | 883                | 10   | 85 <sup>c</sup>                              |
| FIT-DNA 50-85, 1 | 12,888                                              | 0           | 0    | 2,901 | 252  | 14  | 22            | 980                | 12   | 83                                           |

**eTable 11.** Outcomes and efficiency ratios for stool-based screening strategies<sup>a</sup> with an age to begin screening of 50 or 55 years (continued).

| Model/strategy<br>Modality, age to begin-<br>age to end (y), interval (y) | Outcomes per 1,000 40-year-olds |      |      |       |     |                    |                       |      |      | Efficiency ratio <sup>b</sup><br>(ΔCOL/ΔLYG) |
|---------------------------------------------------------------------------|---------------------------------|------|------|-------|-----|--------------------|-----------------------|------|------|----------------------------------------------|
|                                                                           | Stool tests                     | SIGs | CTCs | COLs  | LYG | Compli-<br>cations | CRC deaths<br>averted | ΔCOL | ΔLYG |                                              |
| <b>CRC-SPIN</b>                                                           |                                 |      |      |       |     |                    |                       |      |      |                                              |
| FIT 55-75, 3                                                              | 5,301                           | 0    | 0    | 895   | 152 | 7                  | 14                    | —    | —    | —                                            |
| FIT 55-80, 3                                                              | 6,254                           | 0    | 0    | 995   | 164 | 8                  | 16                    | 99   | 12   | 8 <sup>c</sup>                               |
| FIT 55-85, 3                                                              | 6,836                           | 0    | 0    | 1,051 | 168 | 9                  | 17                    | ND   | ND   | Dominated <sup>W</sup>                       |
| FIT 50-75, 3                                                              | 6,857                           | 0    | 0    | 1,081 | 178 | 7                  | 16                    | 186  | 26   | 7                                            |
| HSgFOBT 55-75, 3                                                          | 5,053                           | 0    | 0    | 1,082 | 156 | 7                  | 15                    | ND   | ND   | Dominated <sup>S</sup>                       |
| FIT 55-75, 2                                                              | 7,575                           | 0    | 0    | 1,160 | 183 | 8                  | 17                    | 79   | 5    | 15 <sup>c</sup>                              |
| FIT 50-80, 3                                                              | 7,660                           | 0    | 0    | 1,163 | 187 | 8                  | 17                    | 82   | 9    | 9 <sup>c</sup>                               |
| FIT 50-85, 3                                                              | 8,084                           | 0    | 0    | 1,201 | 191 | 9                  | 18                    | 120  | 13   | 10 <sup>c</sup>                              |
| HSgFOBT 55-80, 3                                                          | 5,932                           | 0    | 0    | 1,204 | 167 | 9                  | 16                    | ND   | ND   | Dominated <sup>S</sup>                       |
| FIT 55-80, 2                                                              | 8,410                           | 0    | 0    | 1,237 | 190 | 9                  | 18                    | ND   | ND   | Dominated <sup>S</sup>                       |
| FIT-DNA 55-75, 5                                                          | 3,570                           | 0    | 0    | 1,261 | 172 | 9                  | 16                    | ND   | ND   | Dominated <sup>S</sup>                       |
| HSgFOBT 55-85, 3                                                          | 6,429                           | 0    | 0    | 1,269 | 171 | 10                 | 17                    | ND   | ND   | Dominated <sup>S</sup>                       |
| FIT 55-85, 2                                                              | 9,309                           | 0    | 0    | 1,313 | 196 | 10                 | 19                    | ND   | ND   | Dominated <sup>W</sup>                       |
| HSgFOBT 50-75, 3                                                          | 6,498                           | 0    | 0    | 1,317 | 183 | 8                  | 16                    | ND   | ND   | Dominated <sup>S</sup>                       |
| FIT-DNA 55-80, 5                                                          | 3,967                           | 0    | 0    | 1,343 | 177 | 10                 | 18                    | ND   | ND   | Dominated <sup>S</sup>                       |
| FIT 50-75, 2                                                              | 9,241                           | 0    | 0    | 1,346 | 207 | 9                  | 18                    | 265  | 29   | 9                                            |
| HSgFOBT 55-75, 2                                                          | 6,959                           | 0    | 0    | 1,394 | 187 | 9                  | 18                    | ND   | ND   | Dominated <sup>S</sup>                       |
| FIT-DNA 55-85, 5                                                          | 4,235                           | 0    | 0    | 1,397 | 180 | 11                 | 18                    | ND   | ND   | Dominated <sup>S</sup>                       |
| HSgFOBT 50-80, 3                                                          | 7,184                           | 0    | 0    | 1,412 | 192 | 9                  | 18                    | ND   | ND   | Dominated <sup>S</sup>                       |
| FIT 50-80, 2                                                              | 10,476                          | 0    | 0    | 1,454 | 218 | 10                 | 20                    | 108  | 10   | 10                                           |
| HSgFOBT 50-85, 3                                                          | 7,643                           | 0    | 0    | 1,466 | 195 | 10                 | 18                    | ND   | ND   | Dominated <sup>S</sup>                       |
| FIT-DNA 50-75, 5                                                          | 4,370                           | 0    | 0    | 1,473 | 195 | 9                  | 18                    | ND   | ND   | Dominated <sup>S</sup>                       |
| HSgFOBT 55-80, 2                                                          | 7,706                           | 0    | 0    | 1,487 | 194 | 10                 | 19                    | ND   | ND   | Dominated <sup>S</sup>                       |
| FIT 50-85, 2                                                              | 11,071                          | 0    | 0    | 1,504 | 220 | 11                 | 20                    | 49   | 2    | 24 <sup>c</sup>                              |
| FIT-DNA 55-75, 3                                                          | 4,640                           | 0    | 0    | 1,520 | 197 | 10                 | 19                    | ND   | ND   | Dominated <sup>S</sup>                       |
| FIT-DNA 50-80, 5                                                          | 4,762                           | 0    | 0    | 1,554 | 200 | 10                 | 19                    | ND   | ND   | Dominated <sup>S</sup>                       |
| HSgFOBT 55-85, 2                                                          | 8,513                           | 0    | 0    | 1,581 | 198 | 11                 | 20                    | ND   | ND   | Dominated <sup>S</sup>                       |
| FIT-DNA 50-85, 5                                                          | 5,028                           | 0    | 0    | 1,606 | 203 | 11                 | 19                    | ND   | ND   | Dominated <sup>S</sup>                       |
| FIT 55-75, 1                                                              | 12,290                          | 0    | 0    | 1,611 | 217 | 10                 | 20                    | ND   | ND   | Dominated <sup>S</sup>                       |
| HSgFOBT 50-75, 2                                                          | 8,448                           | 0    | 0    | 1,626 | 212 | 9                  | 19                    | ND   | ND   | Dominated <sup>S</sup>                       |
| FIT-DNA 55-80, 3                                                          | 5,379                           | 0    | 0    | 1,663 | 206 | 11                 | 20                    | ND   | ND   | Dominated <sup>S</sup>                       |
| FIT 55-80, 1                                                              | 13,929                          | 0    | 0    | 1,729 | 224 | 12                 | 21                    | ND   | ND   | Dominated <sup>W</sup>                       |
| FIT-DNA 55-85, 3                                                          | 5,774                           | 0    | 0    | 1,734 | 209 | 12                 | 21                    | ND   | ND   | Dominated <sup>S</sup>                       |
| HSgFOBT 50-80, 2                                                          | 9,554                           | 0    | 0    | 1,763 | 221 | 10                 | 20                    | ND   | ND   | Dominated <sup>S</sup>                       |
| FIT 55-85, 1                                                              | 15,093                          | 0    | 0    | 1,809 | 226 | 13                 | 22                    | ND   | ND   | Dominated <sup>W</sup>                       |
| HSgFOBT 50-85, 2                                                          | 10,089                          | 0    | 0    | 1,824 | 223 | 11                 | 21                    | ND   | ND   | Dominated <sup>S</sup>                       |
| FIT-DNA 50-75, 3                                                          | 5,927                           | 0    | 0    | 1,827 | 226 | 10                 | 20                    | ND   | ND   | Dominated <sup>W</sup>                       |
| HSgFOBT 55-75, 1                                                          | 10,467                          | 0    | 0    | 1,899 | 219 | 11                 | 21                    | ND   | ND   | Dominated <sup>S</sup>                       |
| FIT 50-75, 1                                                              | 15,444                          | 0    | 0    | 1,899 | 244 | 11                 | 22                    | 445  | 26   | 17                                           |
| FIT-DNA 50-80, 3                                                          | 6,476                           | 0    | 0    | 1,931 | 232 | 11                 | 21                    | ND   | ND   | Dominated <sup>S</sup>                       |
| FIT-DNA 50-85, 3                                                          | 6,903                           | 0    | 0    | 2,005 | 235 | 12                 | 22                    | ND   | ND   | Dominated <sup>S</sup>                       |
| FIT 50-80, 1                                                              | 17,062                          | 0    | 0    | 2,013 | 250 | 12                 | 23                    | 114  | 6    | 18                                           |
| HSgFOBT 55-80, 1                                                          | 11,806                          | 0    | 0    | 2,043 | 224 | 12                 | 22                    | ND   | ND   | Dominated <sup>S</sup>                       |
| FIT 50-85, 1                                                              | 18,224                          | 0    | 0    | 2,091 | 253 | 13                 | 23                    | 78   | 3    | 26                                           |
| HSgFOBT 55-85, 1                                                          | 12,765                          | 0    | 0    | 2,143 | 227 | 13                 | 22                    | ND   | ND   | Dominated <sup>S</sup>                       |
| HSgFOBT 50-75, 1                                                          | 13,026                          | 0    | 0    | 2,253 | 247 | 11                 | 22                    | ND   | ND   | Dominated <sup>S</sup>                       |
| FIT-DNA 55-75, 1                                                          | 8,647                           | 0    | 0    | 2,315 | 234 | 12                 | 22                    | ND   | ND   | Dominated <sup>S</sup>                       |
| HSgFOBT 50-80, 1                                                          | 14,364                          | 0    | 0    | 2,395 | 252 | 12                 | 23                    | ND   | ND   | Dominated <sup>S</sup>                       |
| FIT-DNA 55-80, 1                                                          | 9,673                           | 0    | 0    | 2,471 | 238 | 14                 | 23                    | ND   | ND   | Dominated <sup>S</sup>                       |
| HSgFOBT 50-85, 1                                                          | 15,321                          | 0    | 0    | 2,493 | 255 | 14                 | 23                    | 402  | 1    | 318 <sup>c</sup>                             |
| FIT-DNA 55-85, 1                                                          | 10,427                          | 0    | 0    | 2,582 | 239 | 15                 | 23                    | ND   | ND   | Dominated <sup>S</sup>                       |
| FIT-DNA 50-75, 1                                                          | 10,745                          | 0    | 0    | 2,729 | 261 | 13                 | 23                    | 638  | 7    | 87 <sup>c</sup>                              |
| FIT-DNA 50-80, 1                                                          | 11,795                          | 0    | 0    | 2,886 | 265 | 14                 | 24                    | 795  | 11   | 70 <sup>c</sup>                              |
| FIT-DNA 50-85, 1                                                          | 12,542                          | 0    | 0    | 2,994 | 266 | 15                 | 24                    | 903  | 13   | 69                                           |

**eTable 11.** Outcomes and efficiency ratios for stool-based screening strategies<sup>a</sup> with an age to begin screening of 50 or 55 years (continued).

COL indicates colonoscopy; CRC, colorectal cancer; CRC-SPIN, CRC Simulated Population Model for Incidence and Natural History; CTC, computed tomographic colonography; FIT, fecal immunochemical test with positivity cutoff of  $\geq 100$  ng of hemoglobin (Hb) per mL of buffer ( $\geq 20$   $\mu$ g Hb/g of feces); FIT-DNA, multitarget stool DNA test (fecal immunochemical test with a DNA stool test); HSgFOBT, high-sensitivity guaiac-based fecal occult blood test; LYG, life-years gained compared with no screening; MISCAN, Microsimulation Screening Analysis; ND, indicates  $\Delta$ COL and  $\Delta$ LYG are not defined because the strategy was not an efficient or near-efficient option; S, strategy is strongly dominated (ie, another strategy within the modality requires fewer colonoscopies and provides more LYG [eFigure 2]); SIG, flexible sigmoidoscopy; SimCRC, Simulation Model of CRC; W, strategy is weakly dominated (ie, another more burdensome strategy within the modality provides more LYG but requires fewer additional colonoscopies per additional LYG to achieve those gains [eFigure 2]) and does not meet the criterion for near-efficiency;  $\Delta$ COL, incremental number of colonoscopies compared with the next-most effective non-dominated strategy;  $\Delta$ LYG, incremental number of LYG compared with the next-most effective non-dominated strategy; — indicates the default strategy (ie, the least burdensome and least effective strategy).

<sup>a</sup> FIT, FIT-DNA, HSgFOBT.

<sup>b</sup> Due to rounding, efficiency ratio may not equal  $\Delta$ COL/ $\Delta$ LYG.

<sup>c</sup> Strategy is near-efficient (ie, it is weakly dominated and its LYG are within 98% of the efficient frontier).

**eTable 12.** Outcomes and efficiency ratios for strategies combining SIG and stool testing<sup>a</sup> with an age to begin screening of 50 or 55 years. Strategies are ordered by the number of colonoscopies required.

| Model/strategy<br>Modality, age to begin-<br>age to end (y), SIG interval_<br>stool test interval (y) | Outcomes per 1,000 40-year-olds |       |      |       |     |                    |                       |      |      | Efficiency<br>ratio <sup>b</sup><br>(ΔCOL/ΔLYG) |
|-------------------------------------------------------------------------------------------------------|---------------------------------|-------|------|-------|-----|--------------------|-----------------------|------|------|-------------------------------------------------|
|                                                                                                       | Stool<br>tests                  | SIGs  | CTCs | COLs  | LYG | Compli-<br>cations | CRC deaths<br>averted | ΔCOL | ΔLYG |                                                 |
| <b>SimCRC</b>                                                                                         |                                 |       |      |       |     |                    |                       |      |      |                                                 |
| SIG+FIT 55-75, 10_2                                                                                   | 6,468                           | 1,956 | 0    | 1,725 | 231 | 11                 | 22                    | —    | —    | —                                               |
| SIG+FIT 55-80, 10_2                                                                                   | 7,111                           | 1,997 | 0    | 1,781 | 233 | 11                 | 22                    | ND   | ND   | Dominated <sup>W</sup>                          |
| SIG+FIT 55-75, 5_3                                                                                    | 4,200                           | 3,003 | 0    | 1,832 | 229 | 11                 | 22                    | ND   | ND   | Dominated <sup>S</sup>                          |
| SIG+FIT 55-85, 10_2                                                                                   | 7,830                           | 2,197 | 0    | 1,884 | 235 | 13                 | 23                    | ND   | ND   | Dominated <sup>W</sup>                          |
| SIG+FIT 50-75, 10_2                                                                                   | 7,942                           | 2,196 | 0    | 1,917 | 262 | 10                 | 23                    | 192  | 31   | 6                                               |
| SIG+FIT 55-75, 5_2                                                                                    | 5,893                           | 2,893 | 0    | 1,928 | 234 | 11                 | 22                    | ND   | ND   | Dominated <sup>S</sup>                          |
| SIG+HSgFOBT 55-75, 10_2                                                                               | 5,898                           | 1,790 | 0    | 1,932 | 231 | 11                 | 22                    | ND   | ND   | Dominated <sup>S</sup>                          |
| SIG+FIT 55-80, 5_3                                                                                    | 4,803                           | 3,305 | 0    | 1,950 | 233 | 12                 | 22                    | ND   | ND   | Dominated <sup>S</sup>                          |
| SIG+HSgFOBT 55-75, 5_3                                                                                | 4,013                           | 2,788 | 0    | 1,963 | 229 | 11                 | 22                    | ND   | ND   | Dominated <sup>S</sup>                          |
| SIG+FIT 55-75, 10_1                                                                                   | 10,553                          | 1,817 | 0    | 1,965 | 238 | 11                 | 22                    | ND   | ND   | Dominated <sup>S</sup>                          |
| SIG+HSgFOBT 55-80, 10_2                                                                               | 6,471                           | 1,858 | 0    | 2,016 | 233 | 12                 | 22                    | ND   | ND   | Dominated <sup>S</sup>                          |
| SIG+FIT 55-85, 5_3                                                                                    | 5,168                           | 3,505 | 0    | 2,020 | 233 | 13                 | 23                    | ND   | ND   | Dominated <sup>S</sup>                          |
| SIG+FIT 55-80, 5_2                                                                                    | 6,514                           | 3,178 | 0    | 2,039 | 236 | 12                 | 23                    | ND   | ND   | Dominated <sup>S</sup>                          |
| SIG+FIT 55-80, 10_1                                                                                   | 11,892                          | 1,902 | 0    | 2,069 | 240 | 12                 | 23                    | ND   | ND   | Dominated <sup>S</sup>                          |
| SIG+FIT 50-80, 10_2                                                                                   | 8,960                           | 2,494 | 0    | 2,076 | 267 | 12                 | 24                    | 159  | 5    | 31                                              |
| SIG+HSgFOBT 55-80, 5_3                                                                                | 4,568                           | 3,067 | 0    | 2,095 | 232 | 13                 | 22                    | ND   | ND   | Dominated <sup>S</sup>                          |
| SIG+HSgFOBT 55-75, 5_2                                                                                | 5,432                           | 2,622 | 0    | 2,097 | 233 | 12                 | 22                    | ND   | ND   | Dominated <sup>S</sup>                          |
| SIG+FIT 50-85, 10_2                                                                                   | 9,412                           | 2,534 | 0    | 2,116 | 268 | 13                 | 24                    | 40   | 1    | 56 <sup>c</sup>                                 |
| SIG+FIT 55-85, 5_2                                                                                    | 7,087                           | 3,372 | 0    | 2,119 | 237 | 14                 | 23                    | ND   | ND   | Dominated <sup>S</sup>                          |
| SIG+FIT 50-75, 5_3                                                                                    | 5,367                           | 3,700 | 0    | 2,127 | 263 | 11                 | 23                    | ND   | ND   | Dominated <sup>S</sup>                          |
| SIG+HSgFOBT 55-85, 10_2                                                                               | 7,097                           | 2,022 | 0    | 2,129 | 234 | 13                 | 23                    | ND   | ND   | Dominated <sup>S</sup>                          |
| SIG+FIT 55-85, 10_1                                                                                   | 12,853                          | 2,053 | 0    | 2,166 | 241 | 14                 | 23                    | ND   | ND   | Dominated <sup>S</sup>                          |
| SIG+HSgFOBT 55-85, 5_3                                                                                | 4,891                           | 3,253 | 0    | 2,173 | 233 | 14                 | 23                    | ND   | ND   | Dominated <sup>S</sup>                          |
| SIG+HSgFOBT 50-75, 10_2                                                                               | 7,212                           | 2,042 | 0    | 2,190 | 262 | 11                 | 23                    | ND   | ND   | Dominated <sup>S</sup>                          |
| SIG+HSgFOBT 55-80, 5_2                                                                                | 5,985                           | 2,877 | 0    | 2,221 | 236 | 13                 | 23                    | ND   | ND   | Dominated <sup>S</sup>                          |
| SIG+FIT 50-75, 5_2                                                                                    | 7,296                           | 3,559 | 0    | 2,224 | 267 | 11                 | 24                    | ND   | ND   | Dominated <sup>S</sup>                          |
| SIG+FIT 50-80, 5_3                                                                                    | 5,887                           | 3,997 | 0    | 2,237 | 266 | 12                 | 24                    | ND   | ND   | Dominated <sup>S</sup>                          |
| SIG+HSgFOBT 55-75, 10_1                                                                               | 8,817                           | 1,625 | 0    | 2,241 | 237 | 12                 | 22                    | ND   | ND   | Dominated <sup>S</sup>                          |
| SIG+FIT 50-75, 10_1                                                                                   | 13,393                          | 2,097 | 0    | 2,248 | 270 | 11                 | 24                    | 172  | 3    | 54 <sup>c</sup>                                 |
| SIG+HSgFOBT 50-75, 5_3                                                                                | 5,099                           | 3,425 | 0    | 2,294 | 263 | 12                 | 23                    | ND   | ND   | Dominated <sup>S</sup>                          |
| SIG+FIT 50-85, 5_3                                                                                    | 6,217                           | 4,202 | 0    | 2,305 | 267 | 13                 | 24                    | ND   | ND   | Dominated <sup>S</sup>                          |
| SIG+HSgFOBT 55-85, 5_2                                                                                | 6,501                           | 3,056 | 0    | 2,317 | 237 | 14                 | 23                    | ND   | ND   | Dominated <sup>S</sup>                          |
| SIG+FIT 50-80, 5_2                                                                                    | 8,109                           | 3,846 | 0    | 2,347 | 270 | 13                 | 24                    | ND   | ND   | Dominated <sup>S</sup>                          |
| SIG+HSgFOBT 50-80, 10_2                                                                               | 8,100                           | 2,283 | 0    | 2,360 | 267 | 13                 | 24                    | ND   | ND   | Dominated <sup>S</sup>                          |
| SIG+HSgFOBT 55-80, 10_1                                                                               | 9,891                           | 1,749 | 0    | 2,387 | 240 | 13                 | 23                    | ND   | ND   | Dominated <sup>S</sup>                          |
| SIG+FIT 50-80, 10_1                                                                                   | 14,761                          | 2,320 | 0    | 2,395 | 274 | 13                 | 25                    | 320  | 7    | 48                                              |
| SIG+HSgFOBT 50-80, 5_3                                                                                | 5,559                           | 3,699 | 0    | 2,413 | 265 | 13                 | 24                    | ND   | ND   | Dominated <sup>S</sup>                          |
| SIG+FIT 50-85, 5_2                                                                                    | 8,557                           | 4,041 | 0    | 2,419 | 271 | 14                 | 24                    | ND   | ND   | Dominated <sup>S</sup>                          |
| SIG+HSgFOBT 50-85, 10_2                                                                               | 8,502                           | 2,345 | 0    | 2,420 | 268 | 13                 | 24                    | ND   | ND   | Dominated <sup>S</sup>                          |
| SIG+HSgFOBT 50-75, 5_2                                                                                | 6,689                           | 3,211 | 0    | 2,431 | 267 | 12                 | 24                    | ND   | ND   | Dominated <sup>S</sup>                          |
| SIG+FIT 50-85, 10_1                                                                                   | 15,698                          | 2,396 | 0    | 2,469 | 275 | 14                 | 25                    | 73   | 1    | 92                                              |
| SIG+HSgFOBT 55-85, 10_1                                                                               | 10,643                          | 1,861 | 0    | 2,493 | 241 | 14                 | 23                    | ND   | ND   | Dominated <sup>S</sup>                          |
| SIG+HSgFOBT 50-85, 5_3                                                                                | 5,893                           | 3,892 | 0    | 2,494 | 266 | 14                 | 24                    | ND   | ND   | Dominated <sup>S</sup>                          |
| SIG+HSgFOBT 50-80, 5_2                                                                                | 7,423                           | 3,473 | 0    | 2,576 | 270 | 13                 | 24                    | ND   | ND   | Dominated <sup>S</sup>                          |
| SIG+HSgFOBT 50-75, 10_1                                                                               | 11,100                          | 1,926 | 0    | 2,616 | 271 | 12                 | 24                    | ND   | ND   | Dominated <sup>S</sup>                          |
| SIG+HSgFOBT 50-85, 5_2                                                                                | 7,818                           | 3,651 | 0    | 2,658 | 271 | 14                 | 24                    | ND   | ND   | Dominated <sup>S</sup>                          |
| SIG+HSgFOBT 50-80, 10_1                                                                               | 12,172                          | 2,091 | 0    | 2,776 | 274 | 13                 | 25                    | ND   | ND   | Dominated <sup>S</sup>                          |
| SIG+HSgFOBT 50-85, 10_1                                                                               | 12,922                          | 2,188 | 0    | 2,875 | 274 | 15                 | 25                    | ND   | ND   | Dominated <sup>S</sup>                          |

**eTable 12.** Outcomes and efficiency ratios for strategies combining SIG and stool testing<sup>a</sup> with an age to begin screening of 50 or 55 years (continued).

| Model/strategy<br>Modality, age to begin-<br>age to end (y), SIG interval_<br>stool test interval (y) | Outcomes per 1,000 40-year-olds |       |      |       |     |                    |                       |      |      | Efficiency<br>ratio <sup>b</sup><br>(ΔCOL/ΔLYG) |
|-------------------------------------------------------------------------------------------------------|---------------------------------|-------|------|-------|-----|--------------------|-----------------------|------|------|-------------------------------------------------|
|                                                                                                       | Stool<br>tests                  | SIGs  | CTCs | COLs  | LYG | Compli-<br>cations | CRC deaths<br>averted | ΔCOL | ΔLYG |                                                 |
| <b>MISCAN</b>                                                                                         |                                 |       |      |       |     |                    |                       |      |      |                                                 |
| SIG+FIT 55-75, 10_2                                                                                   | 5,908                           | 1,728 | 0    | 1,957 | 213 | 12                 | 20                    | —    | —    | —                                               |
| SIG+FIT 55-80, 10_2                                                                                   | 6,524                           | 1,728 | 0    | 1,988 | 215 | 12                 | 20                    | 31   | 2    | 15 <sup>c</sup>                                 |
| SIG+FIT 55-85, 10_2                                                                                   | 7,222                           | 1,919 | 0    | 2,072 | 217 | 13                 | 21                    | ND   | ND   | Dominated <sup>W</sup>                          |
| SIG+FIT 55-75, 5_3                                                                                    | 3,653                           | 2,729 | 0    | 2,121 | 215 | 12                 | 20                    | ND   | ND   | Dominated <sup>S</sup>                          |
| SIG+HSgFOBT 55-75, 10_2                                                                               | 5,368                           | 1,544 | 0    | 2,126 | 212 | 12                 | 20                    | ND   | ND   | Dominated <sup>S</sup>                          |
| SIG+FIT 50-75, 10_2                                                                                   | 7,306                           | 1,886 | 0    | 2,157 | 232 | 11                 | 20                    | 201  | 20   | 10                                              |
| SIG+FIT 55-75, 5_2                                                                                    | 5,303                           | 2,601 | 0    | 2,171 | 218 | 12                 | 20                    | ND   | ND   | Dominated <sup>S</sup>                          |
| SIG+HSgFOBT 55-80, 10_2                                                                               | 5,901                           | 1,544 | 0    | 2,176 | 214 | 12                 | 20                    | ND   | ND   | Dominated <sup>S</sup>                          |
| SIG+FIT 55-75, 10_1                                                                                   | 9,903                           | 1,743 | 0    | 2,212 | 223 | 12                 | 21                    | ND   | ND   | Dominated <sup>S</sup>                          |
| SIG+HSgFOBT 55-75, 5_3                                                                                | 3,459                           | 2,549 | 0    | 2,225 | 214 | 12                 | 20                    | ND   | ND   | Dominated <sup>S</sup>                          |
| SIG+FIT 55-80, 5_3                                                                                    | 4,251                           | 3,027 | 0    | 2,228 | 219 | 13                 | 21                    | ND   | ND   | Dominated <sup>S</sup>                          |
| SIG+FIT 55-80, 5_2                                                                                    | 5,839                           | 2,884 | 0    | 2,270 | 221 | 13                 | 21                    | ND   | ND   | Dominated <sup>S</sup>                          |
| SIG+FIT 55-80, 10_1                                                                                   | 11,214                          | 1,743 | 0    | 2,272 | 225 | 13                 | 21                    | ND   | ND   | Dominated <sup>S</sup>                          |
| SIG+HSgFOBT 55-85, 10_2                                                                               | 6,506                           | 1,703 | 0    | 2,273 | 215 | 13                 | 20                    | ND   | ND   | Dominated <sup>S</sup>                          |
| SIG+FIT 55-85, 5_3                                                                                    | 4,641                           | 3,194 | 0    | 2,277 | 220 | 14                 | 21                    | ND   | ND   | Dominated <sup>S</sup>                          |
| SIG+FIT 50-80, 10_2                                                                                   | 8,260                           | 2,164 | 0    | 2,291 | 238 | 13                 | 21                    | 134  | 6    | 24                                              |
| SIG+HSgFOBT 55-75, 5_2                                                                                | 4,866                           | 2,339 | 0    | 2,308 | 217 | 13                 | 20                    | ND   | ND   | Dominated <sup>S</sup>                          |
| SIG+FIT 50-85, 10_2                                                                                   | 8,706                           | 2,164 | 0    | 2,313 | 239 | 13                 | 22                    | 21   | 1    | 27 <sup>c</sup>                                 |
| SIG+FIT 55-85, 5_2                                                                                    | 6,422                           | 3,043 | 0    | 2,326 | 222 | 14                 | 21                    | ND   | ND   | Dominated <sup>S</sup>                          |
| SIG+HSgFOBT 55-80, 5_3                                                                                | 4,010                           | 2,822 | 0    | 2,347 | 218 | 13                 | 21                    | ND   | ND   | Dominated <sup>S</sup>                          |
| SIG+FIT 55-85, 10_1                                                                                   | 12,233                          | 1,931 | 0    | 2,364 | 227 | 14                 | 21                    | ND   | ND   | Dominated <sup>S</sup>                          |
| SIG+HSgFOBT 50-75, 10_2                                                                               | 6,594                           | 1,677 | 0    | 2,374 | 231 | 12                 | 20                    | ND   | ND   | Dominated <sup>S</sup>                          |
| SIG+HSgFOBT 55-85, 5_3                                                                                | 4,368                           | 2,969 | 0    | 2,406 | 219 | 14                 | 21                    | ND   | ND   | Dominated <sup>S</sup>                          |
| SIG+HSgFOBT 55-80, 5_2                                                                                | 5,334                           | 2,588 | 0    | 2,417 | 220 | 14                 | 21                    | ND   | ND   | Dominated <sup>S</sup>                          |
| SIG+FIT 50-75, 5_3                                                                                    | 4,737                           | 3,380 | 0    | 2,451 | 239 | 13                 | 21                    | ND   | ND   | Dominated <sup>S</sup>                          |
| SIG+HSgFOBT 55-75, 10_1                                                                               | 8,346                           | 1,506 | 0    | 2,461 | 222 | 13                 | 21                    | ND   | ND   | Dominated <sup>S</sup>                          |
| SIG+HSgFOBT 55-85, 5_2                                                                                | 5,855                           | 2,722 | 0    | 2,488 | 221 | 14                 | 21                    | ND   | ND   | Dominated <sup>S</sup>                          |
| SIG+FIT 50-75, 10_1                                                                                   | 12,642                          | 1,903 | 0    | 2,490 | 246 | 12                 | 22                    | 199  | 8    | 24                                              |
| SIG+FIT 50-75, 5_2                                                                                    | 6,523                           | 3,221 | 0    | 2,501 | 241 | 13                 | 21                    | ND   | ND   | Dominated <sup>S</sup>                          |
| SIG+HSgFOBT 50-80, 10_2                                                                               | 7,423                           | 1,908 | 0    | 2,524 | 236 | 13                 | 21                    | ND   | ND   | Dominated <sup>S</sup>                          |
| SIG+FIT 50-80, 5_3                                                                                    | 5,284                           | 3,625 | 0    | 2,534 | 241 | 13                 | 22                    | ND   | ND   | Dominated <sup>S</sup>                          |
| SIG+HSgFOBT 55-80, 10_1                                                                               | 9,391                           | 1,506 | 0    | 2,554 | 224 | 13                 | 21                    | ND   | ND   | Dominated <sup>S</sup>                          |
| SIG+HSgFOBT 50-85, 10_2                                                                               | 7,811                           | 1,908 | 0    | 2,558 | 237 | 13                 | 21                    | ND   | ND   | Dominated <sup>S</sup>                          |
| SIG+FIT 50-85, 5_3                                                                                    | 5,491                           | 3,802 | 0    | 2,579 | 242 | 14                 | 22                    | ND   | ND   | Dominated <sup>S</sup>                          |
| SIG+HSgFOBT 50-75, 5_3                                                                                | 4,462                           | 3,146 | 0    | 2,587 | 238 | 13                 | 21                    | ND   | ND   | Dominated <sup>S</sup>                          |
| SIG+FIT 50-80, 5_2                                                                                    | 7,328                           | 3,453 | 0    | 2,592 | 244 | 13                 | 22                    | ND   | ND   | Dominated <sup>S</sup>                          |
| SIG+FIT 50-80, 10_1                                                                                   | 14,039                          | 2,177 | 0    | 2,635 | 251 | 14                 | 22                    | 144  | 5    | 31                                              |
| SIG+FIT 50-85, 5_2                                                                                    | 7,717                           | 3,646 | 0    | 2,650 | 245 | 14                 | 22                    | ND   | ND   | Dominated <sup>S</sup>                          |
| SIG+HSgFOBT 55-85, 10_1                                                                               | 10,210                          | 1,651 | 0    | 2,662 | 225 | 14                 | 21                    | ND   | ND   | Dominated <sup>S</sup>                          |
| SIG+HSgFOBT 50-75, 5_2                                                                                | 5,947                           | 2,882 | 0    | 2,667 | 240 | 13                 | 21                    | ND   | ND   | Dominated <sup>S</sup>                          |
| SIG+FIT 50-85, 10_1                                                                                   | 14,983                          | 2,177 | 0    | 2,675 | 252 | 14                 | 23                    | 41   | 1    | 59                                              |
| SIG+HSgFOBT 50-80, 5_3                                                                                | 4,963                           | 3,362 | 0    | 2,683 | 240 | 14                 | 22                    | ND   | ND   | Dominated <sup>S</sup>                          |
| SIG+HSgFOBT 50-85, 5_3                                                                                | 5,154                           | 3,526 | 0    | 2,733 | 241 | 14                 | 22                    | ND   | ND   | Dominated <sup>S</sup>                          |
| SIG+HSgFOBT 50-80, 5_2                                                                                | 6,666                           | 3,079 | 0    | 2,778 | 243 | 14                 | 22                    | ND   | ND   | Dominated <sup>S</sup>                          |
| SIG+HSgFOBT 50-75, 10_1                                                                               | 10,562                          | 1,633 | 0    | 2,814 | 245 | 13                 | 21                    | ND   | ND   | Dominated <sup>S</sup>                          |
| SIG+HSgFOBT 50-85, 5_2                                                                                | 7,009                           | 3,248 | 0    | 2,844 | 243 | 14                 | 22                    | ND   | ND   | Dominated <sup>S</sup>                          |
| SIG+HSgFOBT 50-80, 10_1                                                                               | 11,686                          | 1,844 | 0    | 2,977 | 249 | 14                 | 22                    | ND   | ND   | Dominated <sup>S</sup>                          |
| SIG+HSgFOBT 50-85, 10_1                                                                               | 12,442                          | 1,844 | 0    | 3,042 | 250 | 15                 | 22                    | ND   | ND   | Dominated <sup>S</sup>                          |



**eTable 12.** Outcomes and efficiency ratios for strategies combining SIG and stool testing<sup>a</sup> with an age to begin screening of 50 or 55 years (continued).

| Model/strategy<br>Modality, age to begin-<br>age to end (y), SIG interval_<br>stool test interval (y) | Outcomes per 1,000 40-year-olds |       |      |       |     |                    |                       |      |      | Efficiency<br>ratio <sup>b</sup><br>(ΔCOL/ΔLYG) |
|-------------------------------------------------------------------------------------------------------|---------------------------------|-------|------|-------|-----|--------------------|-----------------------|------|------|-------------------------------------------------|
|                                                                                                       | Stool<br>tests                  | SIGs  | CTCs | COLs  | LYG | Compli-<br>cations | CRC deaths<br>averted | ΔCOL | ΔLYG |                                                 |
| <b>CRC-SPIN</b>                                                                                       |                                 |       |      |       |     |                    |                       |      |      |                                                 |
| SIG+FIT 55-75, 10_2                                                                                   | 6,569                           | 1,961 | 0    | 1,697 | 217 | 11                 | 20                    | —    | —    | —                                               |
| SIG+FIT 55-75, 5_3                                                                                    | 4,355                           | 3,077 | 0    | 1,700 | 209 | 10                 | 20                    | ND   | ND   | Dominated <sup>S</sup>                          |
| SIG+FIT 55-80, 10_2                                                                                   | 7,255                           | 2,005 | 0    | 1,759 | 220 | 11                 | 21                    | 62   | 3    | 20 <sup>c</sup>                                 |
| SIG+HSgFOBT 55-75, 5_3                                                                                | 4,183                           | 2,881 | 0    | 1,817 | 211 | 11                 | 20                    | ND   | ND   | Dominated <sup>S</sup>                          |
| SIG+FIT 55-80, 5_3                                                                                    | 5,033                           | 3,409 | 0    | 1,818 | 215 | 12                 | 21                    | ND   | ND   | Dominated <sup>S</sup>                          |
| SIG+FIT 55-75, 5_2                                                                                    | 6,100                           | 2,945 | 0    | 1,838 | 219 | 11                 | 21                    | ND   | ND   | Dominated <sup>S</sup>                          |
| SIG+FIT 55-85, 10_2                                                                                   | 8,023                           | 2,217 | 0    | 1,850 | 223 | 13                 | 22                    | ND   | ND   | Dominated <sup>W</sup>                          |
| SIG+HSgFOBT 55-75, 10_2                                                                               | 6,061                           | 1,815 | 0    | 1,869 | 218 | 11                 | 21                    | ND   | ND   | Dominated <sup>S</sup>                          |
| SIG+FIT 55-85, 5_3                                                                                    | 5,451                           | 3,634 | 0    | 1,886 | 216 | 13                 | 21                    | ND   | ND   | Dominated <sup>S</sup>                          |
| SIG+FIT 50-75, 10_2                                                                                   | 8,033                           | 2,192 | 0    | 1,905 | 239 | 11                 | 21                    | 208  | 22   | 9                                               |
| SIG+FIT 55-80, 5_2                                                                                    | 6,780                           | 3,254 | 0    | 1,945 | 223 | 12                 | 21                    | ND   | ND   | Dominated <sup>S</sup>                          |
| SIG+HSgFOBT 55-80, 5_3                                                                                | 4,815                           | 3,191 | 0    | 1,950 | 216 | 12                 | 21                    | ND   | ND   | Dominated <sup>S</sup>                          |
| SIG+HSgFOBT 55-80, 10_2                                                                               | 6,685                           | 1,888 | 0    | 1,953 | 221 | 12                 | 21                    | ND   | ND   | Dominated <sup>S</sup>                          |
| SIG+FIT 50-75, 5_3                                                                                    | 5,559                           | 3,780 | 0    | 1,984 | 235 | 11                 | 21                    | ND   | ND   | Dominated <sup>S</sup>                          |
| SIG+FIT 55-75, 10_1                                                                                   | 10,606                          | 1,808 | 0    | 1,986 | 230 | 12                 | 22                    | ND   | ND   | Dominated <sup>S</sup>                          |
| SIG+HSgFOBT 55-75, 5_2                                                                                | 5,674                           | 2,700 | 0    | 1,987 | 221 | 11                 | 21                    | ND   | ND   | Dominated <sup>S</sup>                          |
| SIG+FIT 55-85, 5_2                                                                                    | 7,427                           | 3,468 | 0    | 2,025 | 226 | 13                 | 22                    | ND   | ND   | Dominated <sup>S</sup>                          |
| SIG+HSgFOBT 55-85, 5_3                                                                                | 5,190                           | 3,403 | 0    | 2,025 | 218 | 13                 | 21                    | ND   | ND   | Dominated <sup>S</sup>                          |
| SIG+FIT 50-80, 10_2                                                                                   | 9,098                           | 2,500 | 0    | 2,053 | 246 | 12                 | 22                    | 148  | 7    | 20                                              |
| SIG+HSgFOBT 55-85, 10_2                                                                               | 7,374                           | 2,067 | 0    | 2,057 | 224 | 13                 | 22                    | ND   | ND   | Dominated <sup>S</sup>                          |
| SIG+FIT 50-80, 5_3                                                                                    | 6,144                           | 4,108 | 0    | 2,090 | 239 | 12                 | 22                    | ND   | ND   | Dominated <sup>S</sup>                          |
| SIG+FIT 55-80, 10_1                                                                                   | 12,010                          | 1,898 | 0    | 2,094 | 234 | 13                 | 22                    | ND   | ND   | Dominated <sup>S</sup>                          |
| SIG+FIT 50-85, 10_2                                                                                   | 9,591                           | 2,544 | 0    | 2,094 | 248 | 13                 | 23                    | 42   | 1    | 31 <sup>c</sup>                                 |
| SIG+HSgFOBT 55-80, 5_2                                                                                | 6,289                           | 2,980 | 0    | 2,107 | 225 | 12                 | 22                    | ND   | ND   | Dominated <sup>S</sup>                          |
| SIG+FIT 50-75, 5_2                                                                                    | 7,506                           | 3,611 | 0    | 2,125 | 244 | 11                 | 22                    | ND   | ND   | Dominated <sup>S</sup>                          |
| SIG+HSgFOBT 50-75, 10_2                                                                               | 7,386                           | 2,062 | 0    | 2,125 | 241 | 11                 | 21                    | ND   | ND   | Dominated <sup>S</sup>                          |
| SIG+HSgFOBT 50-75, 5_3                                                                                | 5,314                           | 3,531 | 0    | 2,132 | 237 | 11                 | 21                    | ND   | ND   | Dominated <sup>S</sup>                          |
| SIG+FIT 50-85, 5_3                                                                                    | 6,516                           | 4,338 | 0    | 2,157 | 241 | 13                 | 22                    | ND   | ND   | Dominated <sup>S</sup>                          |
| SIG+FIT 55-85, 10_1                                                                                   | 13,025                          | 2,056 | 0    | 2,183 | 236 | 14                 | 23                    | ND   | ND   | Dominated <sup>S</sup>                          |
| SIG+HSgFOBT 55-85, 5_2                                                                                | 6,885                           | 3,182 | 0    | 2,201 | 226 | 14                 | 22                    | ND   | ND   | Dominated <sup>S</sup>                          |
| SIG+HSgFOBT 55-75, 10_1                                                                               | 9,070                           | 1,642 | 0    | 2,207 | 231 | 12                 | 22                    | ND   | ND   | Dominated <sup>S</sup>                          |
| SIG+FIT 50-80, 5_2                                                                                    | 8,405                           | 3,922 | 0    | 2,248 | 249 | 13                 | 23                    | 195  | 3    | 65 <sup>c</sup>                                 |
| SIG+HSgFOBT 50-80, 5_3                                                                                | 5,837                           | 3,836 | 0    | 2,249 | 241 | 12                 | 22                    | ND   | ND   | Dominated <sup>S</sup>                          |
| SIG+HSgFOBT 50-80, 10_2                                                                               | 8,339                           | 2,318 | 0    | 2,288 | 248 | 12                 | 23                    | ND   | ND   | Dominated <sup>S</sup>                          |
| SIG+FIT 50-75, 10_1                                                                                   | 13,404                          | 2,079 | 0    | 2,289 | 256 | 12                 | 23                    | 237  | 9    | 25                                              |
| SIG+HSgFOBT 50-75, 5_2                                                                                | 6,949                           | 3,297 | 0    | 2,305 | 246 | 12                 | 22                    | ND   | ND   | Dominated <sup>S</sup>                          |
| SIG+FIT 50-85, 5_2                                                                                    | 8,906                           | 4,138 | 0    | 2,317 | 251 | 13                 | 23                    | ND   | ND   | Dominated <sup>S</sup>                          |
| SIG+HSgFOBT 50-85, 5_3                                                                                | 6,218                           | 4,056 | 0    | 2,327 | 242 | 13                 | 22                    | ND   | ND   | Dominated <sup>S</sup>                          |
| SIG+HSgFOBT 50-85, 10_2                                                                               | 8,790                           | 2,386 | 0    | 2,346 | 250 | 13                 | 23                    | ND   | ND   | Dominated <sup>S</sup>                          |
| SIG+HSgFOBT 55-80, 10_1                                                                               | 10,238                          | 1,773 | 0    | 2,351 | 235 | 13                 | 22                    | ND   | ND   | Dominated <sup>S</sup>                          |
| SIG+FIT 50-80, 10_1                                                                                   | 14,812                          | 2,307 | 0    | 2,428 | 261 | 13                 | 24                    | 139  | 5    | 27                                              |
| SIG+HSgFOBT 50-80, 5_2                                                                                | 7,774                           | 3,585 | 0    | 2,449 | 251 | 13                 | 23                    | ND   | ND   | Dominated <sup>S</sup>                          |
| SIG+HSgFOBT 55-85, 10_1                                                                               | 11,070                          | 1,896 | 0    | 2,454 | 237 | 14                 | 23                    | ND   | ND   | Dominated <sup>S</sup>                          |
| SIG+FIT 50-85, 10_1                                                                                   | 15,814                          | 2,389 | 0    | 2,502 | 263 | 14                 | 24                    | 74   | 2    | 43                                              |
| SIG+HSgFOBT 50-85, 5_2                                                                                | 8,228                           | 3,786 | 0    | 2,529 | 252 | 14                 | 23                    | ND   | ND   | Dominated <sup>S</sup>                          |
| SIG+HSgFOBT 50-75, 10_1                                                                               | 11,376                          | 1,940 | 0    | 2,581 | 258 | 12                 | 23                    | ND   | ND   | Dominated <sup>S</sup>                          |
| SIG+HSgFOBT 50-80, 10_1                                                                               | 12,537                          | 2,115 | 0    | 2,735 | 261 | 13                 | 24                    | ND   | ND   | Dominated <sup>S</sup>                          |
| SIG+HSgFOBT 50-85, 10_1                                                                               | 13,372                          | 2,220 | 0    | 2,834 | 263 | 15                 | 24                    | 332  | 1    | 449                                             |

**eTable 12.** Outcomes and efficiency ratios for strategies combining SIG and stool testing<sup>a</sup> with an age to begin screening of 50 or 55 years (continued).

COL indicates colonoscopy; CRC, colorectal cancer; CRC-SPIN, CRC Simulated Population Model for Incidence and Natural History; CTC, computed tomographic colonography; FIT, fecal immunochemical test with positivity cutoff of  $\geq 100$  ng of hemoglobin (Hb) per mL of buffer ( $\geq 20$   $\mu$ g Hb/g of feces); HSgFOBT, high-sensitivity guaiac-based fecal occult blood test; LYG, life-years gained compared with no screening; MISCAN, Microsimulation Screening Analysis; ND, indicates  $\Delta$ COL and  $\Delta$ LYG are not defined because the strategy was not an efficient or near-efficient option; S, strategy is strongly dominated (ie, another strategy within the modality requires fewer colonoscopies and provides more LYG [eFigure 2]); SIG, flexible sigmoidoscopy; SimCRC, Simulation Model of CRC; W, strategy is weakly dominated (ie, another more burdensome strategy within the modality provides more LYG but requires fewer additional colonoscopies per additional LYG to achieve those gains [eFigure 2]) and does not meet the criterion for near-efficiency;  $\Delta$ COL, incremental number of colonoscopies compared with the next-most effective non-dominated strategy;  $\Delta$ LYG, incremental number of LYG compared with the next-most effective non-dominated strategy. — indicates the default strategy (ie, the least burdensome and least effective strategy).

<sup>a</sup> SIG+FIT, SIG+HSgFOBT.

<sup>b</sup> Due to rounding, efficiency ratio may not equal  $\Delta$ COL/ $\Delta$ LYG.

<sup>c</sup> Strategy is near-efficient (ie, it is weakly dominated and its LYG are within 98% of the efficient frontier).

**eTable 13.** Outcomes for CRC screening strategies with screening from ages 50 to 75 years and the recommendable strategies<sup>a</sup> by model (shaded) when the colonoscopy strategy with a 5-year interval is the benchmark strategy. Within a class of screening modalities, strategies are ordered by the number of colonoscopies required.

| Model<br>Modality, age to begin-<br>age to end (y),<br>interval <sup>b</sup> (y) | Outcomes per 1,000 40-year-olds |       |       |       |     |                    |                          | Efficiency<br>ratio <sup>c</sup> | Efficiency<br>ratio <<br>benchmark | LYG ≥90% of<br>benchmark |
|----------------------------------------------------------------------------------|---------------------------------|-------|-------|-------|-----|--------------------|--------------------------|----------------------------------|------------------------------------|--------------------------|
|                                                                                  | Stool<br>tests                  | SIGs  | CTCs  | COLs  | LYG | Compli-<br>cations | CRC<br>deaths<br>averted |                                  |                                    |                          |
| <b>SimCRC</b>                                                                    |                                 |       |       |       |     |                    |                          |                                  |                                    |                          |
| <b>Colonoscopy</b>                                                               |                                 |       |       |       |     |                    |                          |                                  |                                    |                          |
| COL 50-75, 5                                                                     | 0                               | 0     | 0     | 5,959 | 285 | 18                 | 25                       | 188                              | Benchmark strategy                 |                          |
| <b>Stool test</b>                                                                |                                 |       |       |       |     |                    |                          |                                  |                                    |                          |
| FIT 50-75, 3                                                                     | 6,887                           | 0     | 0     | 971   | 212 | 6                  | 18                       | 5                                | Yes                                | No                       |
| FIT 50-75, 2                                                                     | 9,326                           | 0     | 0     | 1,215 | 234 | 7                  | 20                       | 12                               | Yes                                | No                       |
| HSgFOBT 50-75, 3                                                                 | 6,456                           | 0     | 0     | 1,286 | 212 | 7                  | 18                       | Dominated <sup>s</sup>           | ND                                 | No                       |
| FIT-DNA 50-75, 5                                                                 | 4,391                           | 0     | 0     | 1,364 | 224 | 8                  | 20                       | Dominated <sup>s</sup>           | ND                                 | No                       |
| HSgFOBT 50-75, 2                                                                 | 8,388                           | 0     | 0     | 1,597 | 235 | 9                  | 20                       | Dominated <sup>s</sup>           | ND                                 | No                       |
| FIT-DNA 50-75, 3                                                                 | 5,990                           | 0     | 0     | 1,701 | 250 | 9                  | 22                       | Dominated <sup>w</sup>           | ND                                 | No                       |
| FIT 50-75, 1                                                                     | 15,778                          | 0     | 0     | 1,739 | 260 | 10                 | 23                       | 24 <sup>d</sup>                  | Yes <sup>e</sup>                   | Yes <sup>e</sup>         |
| HSgFOBT 50-75, 1                                                                 | 12,914                          | 0     | 0     | 2,230 | 261 | 11                 | 23                       | Dominated <sup>s</sup>           | ND                                 | Yes                      |
| FIT-DNA 50-75, 1                                                                 | 11,041                          | 0     | 0     | 2,601 | 271 | 12                 | 24                       | 155 <sup>d</sup>                 | Yes                                | Yes                      |
| <b>Sigmoidoscopy</b>                                                             |                                 |       |       |       |     |                    |                          |                                  |                                    |                          |
| SIG 50-75, 10                                                                    | 0                               | 2,480 | 0     | 1,345 | 200 | 8                  | 18                       | 3                                | Yes                                | No                       |
| SIG 50-75, 5                                                                     | 0                               | 4,111 | 0     | 1,820 | 227 | 10                 | 21                       | 18                               | Yes                                | No                       |
| <b>Sigmoidoscopy + stool test</b>                                                |                                 |       |       |       |     |                    |                          |                                  |                                    |                          |
| SIG+FIT 50-75, 10_2                                                              | 7,942                           | 2,196 | 0     | 1,917 | 262 | 10                 | 23                       | 6                                | Yes <sup>e</sup>                   | Yes <sup>e</sup>         |
| SIG+FIT 50-75, 5_3                                                               | 5,367                           | 3,700 | 0     | 2,127 | 263 | 11                 | 23                       | Dominated <sup>s</sup>           | ND                                 | Yes                      |
| SIG+HSgFOBT 50-75, 10_2                                                          | 7,212                           | 2,042 | 0     | 2,190 | 262 | 11                 | 23                       | Dominated <sup>s</sup>           | ND                                 | Yes                      |
| SIG+FIT 50-75, 5_2                                                               | 7,296                           | 3,559 | 0     | 2,224 | 267 | 11                 | 24                       | Dominated <sup>s</sup>           | ND                                 | Yes                      |
| SIG+FIT 50-75, 10_1                                                              | 13,393                          | 2,097 | 0     | 2,248 | 270 | 11                 | 24                       | 54 <sup>d</sup>                  | Yes                                | Yes                      |
| SIG+HSgFOBT 50-75, 5_3                                                           | 5,099                           | 3,425 | 0     | 2,294 | 263 | 12                 | 23                       | Dominated <sup>s</sup>           | ND                                 | Yes                      |
| SIG+HSgFOBT 50-75, 5_2                                                           | 6,689                           | 3,211 | 0     | 2,431 | 267 | 12                 | 24                       | Dominated <sup>s</sup>           | ND                                 | Yes                      |
| SIG+HSgFOBT 50-75, 10_1                                                          | 11,100                          | 1,926 | 0     | 2,616 | 271 | 12                 | 24                       | Dominated <sup>s</sup>           | ND                                 | Yes                      |
| <b>Computed tomographic colonography</b>                                         |                                 |       |       |       |     |                    |                          |                                  |                                    |                          |
| CTC 50-75, 10                                                                    | 0                               | 0     | 2,458 | 1,460 | 239 | 9                  | 21                       | 3                                | Yes                                | No                       |
| CTC 50-75, 5                                                                     | 0                               | 0     | 4,069 | 1,927 | 265 | 11                 | 24                       | 18                               | Yes                                | Yes                      |
| <b>MISCAN</b>                                                                    |                                 |       |       |       |     |                    |                          |                                  |                                    |                          |
| <b>Colonoscopy</b>                                                               |                                 |       |       |       |     |                    |                          |                                  |                                    |                          |
| COL 50-75, 5                                                                     | 0                               | 0     | 0     | 5,948 | 264 | 18                 | 23                       | 114                              | Benchmark strategy                 |                          |
| <b>Stool test</b>                                                                |                                 |       |       |       |     |                    |                          |                                  |                                    |                          |
| FIT 50-75, 3                                                                     | 6,795                           | 0     | 0     | 995   | 176 | 7                  | 15                       | 7                                | Yes                                | No                       |
| FIT 50-75, 2                                                                     | 9,342                           | 0     | 0     | 1,243 | 200 | 8                  | 17                       | 12 <sup>d</sup>                  | Yes                                | No                       |
| HSgFOBT 50-75, 3                                                                 | 6,302                           | 0     | 0     | 1,296 | 175 | 8                  | 15                       | Dominated <sup>s</sup>           | ND                                 | No                       |
| FIT-DNA 50-75, 5                                                                 | 4,380                           | 0     | 0     | 1,402 | 193 | 9                  | 17                       | Dominated <sup>s</sup>           | ND                                 | No                       |
| HSgFOBT 50-75, 2                                                                 | 8,408                           | 0     | 0     | 1,636 | 200 | 9                  | 18                       | Dominated <sup>s</sup>           | ND                                 | No                       |
| FIT-DNA 50-75, 3                                                                 | 5,779                           | 0     | 0     | 1,714 | 215 | 9                  | 19                       | Dominated <sup>s</sup>           | ND                                 | No                       |
| FIT 50-75, 1                                                                     | 15,843                          | 0     | 0     | 1,757 | 231 | 10                 | 20                       | 21 <sup>d</sup>                  | Yes                                | No                       |
| HSgFOBT 50-75, 1                                                                 | 12,927                          | 0     | 0     | 2,287 | 232 | 11                 | 20                       | Dominated <sup>s</sup>           | ND                                 | No                       |
| FIT-DNA 50-75, 1                                                                 | 11,025                          | 0     | 0     | 2,662 | 246 | 12                 | 21                       | 120 <sup>d</sup>                 | No                                 | Yes                      |

**eTable 13.** Outcomes for CRC screening strategies with screening from ages 50 to 75 years and the recommendable strategies<sup>a</sup> by model (shaded) when the colonoscopy strategy with a 5-year interval is the benchmark strategy (continued).

| Model                                    | Outcomes per 1,000 40-year-olds                                  |             |       |       |      |     |               | Efficiency ratio <sup>c</sup> | Efficiency ratio < benchmark | LYG ≥90% of benchmark |
|------------------------------------------|------------------------------------------------------------------|-------------|-------|-------|------|-----|---------------|-------------------------------|------------------------------|-----------------------|
|                                          | Modality, age to begin-age to end (y), interval <sup>b</sup> (y) | Stool tests | SIGs  | CTCs  | COLs | LYG | Complications |                               |                              |                       |
| <b>MISCAN (continued)</b>                |                                                                  |             |       |       |      |     |               |                               |                              |                       |
| <b>Sigmoidoscopy</b>                     |                                                                  |             |       |       |      |     |               |                               |                              |                       |
| SIG 50-75, 10                            | 0                                                                | 2,356       | 0     | 1,881 | 201  | 11  | 18            | 9                             | Yes                          | No                    |
| SIG 50-75, 5                             | 0                                                                | 3,807       | 0     | 2,287 | 221  | 12  | 20            | 20                            | Yes                          | No                    |
| <b>Sigmoidoscopy + stool test</b>        |                                                                  |             |       |       |      |     |               |                               |                              |                       |
| SIG+FIT 50-75, 10_2                      | 7,306                                                            | 1,886       | 0     | 2,157 | 232  | 11  | 20            | 10                            | Yes                          | No                    |
| SIG+HSgFOBT 50-75, 10_2                  | 6,594                                                            | 1,677       | 0     | 2,374 | 231  | 12  | 20            | Dominated <sup>s</sup>        | ND                           | No                    |
| SIG+FIT 50-75, 5_3                       | 4,737                                                            | 3,380       | 0     | 2,451 | 239  | 13  | 21            | Dominated <sup>s</sup>        | ND                           | Yes                   |
| SIG+FIT 50-75, 10_1                      | 12,642                                                           | 1,903       | 0     | 2,490 | 246  | 12  | 22            | 24                            | Yes                          | Yes                   |
| SIG+FIT 50-75, 5_2                       | 6,523                                                            | 3,221       | 0     | 2,501 | 241  | 13  | 21            | Dominated <sup>s</sup>        | ND                           | Yes                   |
| SIG+HSgFOBT 50-75, 5_3                   | 4,462                                                            | 3,146       | 0     | 2,587 | 238  | 13  | 21            | Dominated <sup>s</sup>        | ND                           | Yes                   |
| SIG+HSgFOBT 50-75, 5_2                   | 5,947                                                            | 2,882       | 0     | 2,667 | 240  | 13  | 21            | Dominated <sup>s</sup>        | ND                           | Yes                   |
| SIG+HSgFOBT 50-75, 10_1                  | 10,562                                                           | 1,633       | 0     | 2,814 | 245  | 13  | 21            | Dominated <sup>s</sup>        | ND                           | Yes                   |
| <b>Computed tomographic colonography</b> |                                                                  |             |       |       |      |     |               |                               |                              |                       |
| CTC 50-75, 10                            | 0                                                                | 0           | 2,485 | 1,293 | 184  | 8   | 16            | 6                             | Yes                          | No                    |
| CTC 50-75, 5                             | 0                                                                | 0           | 4,171 | 1,743 | 226  | 10  | 20            | 11                            | Yes                          | No                    |
| <b>CRC-SPIN</b>                          |                                                                  |             |       |       |      |     |               |                               |                              |                       |
| <b>Colonoscopy</b>                       |                                                                  |             |       |       |      |     |               |                               |                              |                       |
| COL 50-75, 5                             | 0                                                                | 0           | 0     | 5,995 | 279  | 19  | 25            | 273                           | Benchmark strategy           |                       |
| <b>Stool test</b>                        |                                                                  |             |       |       |      |     |               |                               |                              |                       |
| FIT 50-75, 3                             | 6,857                                                            | 0           | 0     | 1,081 | 178  | 7   | 16            | 7                             | Yes                          | No                    |
| HSgFOBT 50-75, 3                         | 6,498                                                            | 0           | 0     | 1,317 | 183  | 8   | 16            | Dominated <sup>s</sup>        | ND                           | No                    |
| FIT 50-75, 2                             | 9,241                                                            | 0           | 0     | 1,346 | 207  | 9   | 18            | 9                             | Yes                          | No                    |
| FIT-DNA 50-75, 5                         | 4,370                                                            | 0           | 0     | 1,473 | 195  | 9   | 18            | Dominated <sup>s</sup>        | ND                           | No                    |
| HSgFOBT 50-75, 2                         | 8,448                                                            | 0           | 0     | 1,626 | 212  | 9   | 19            | Dominated <sup>s</sup>        | ND                           | No                    |
| FIT-DNA 50-75, 3                         | 5,927                                                            | 0           | 0     | 1,827 | 226  | 10  | 20            | Dominated <sup>w</sup>        | ND                           | No                    |
| FIT 50-75, 1                             | 15,444                                                           | 0           | 0     | 1,899 | 244  | 11  | 22            | 17                            | Yes                          | No                    |
| HSgFOBT 50-75, 1                         | 13,026                                                           | 0           | 0     | 2,253 | 247  | 11  | 22            | Dominated <sup>s</sup>        | ND                           | No                    |
| FIT-DNA 50-75, 1                         | 10,745                                                           | 0           | 0     | 2,729 | 261  | 13  | 23            | 87 <sup>d</sup>               | Yes                          | Yes                   |
| <b>Sigmoidoscopy</b>                     |                                                                  |             |       |       |      |     |               |                               |                              |                       |
| SIG 50-75, 10                            | 0                                                                | 2,515       | 0     | 1,161 | 165  | 7   | 15            | 6                             | Yes                          | No                    |
| SIG 50-75, 5                             | 0                                                                | 4,298       | 0     | 1,493 | 181  | 9   | 16            | 22                            | Yes                          | No                    |
| <b>Sigmoidoscopy + stool test</b>        |                                                                  |             |       |       |      |     |               |                               |                              |                       |
| SIG+FIT 50-75, 10_2                      | 8,033                                                            | 2,192       | 0     | 1,905 | 239  | 11  | 21            | 9                             | Yes                          | No                    |
| SIG+FIT 50-75, 5_3                       | 5,559                                                            | 3,780       | 0     | 1,984 | 235  | 11  | 21            | Dominated <sup>s</sup>        | ND                           | No                    |
| SIG+FIT 50-75, 5_2                       | 7,506                                                            | 3,611       | 0     | 2,125 | 244  | 11  | 22            | Dominated <sup>s</sup>        | ND                           | No                    |
| SIG+HSgFOBT 50-75, 10_2                  | 7,386                                                            | 2,062       | 0     | 2,125 | 241  | 11  | 21            | Dominated <sup>s</sup>        | ND                           | No                    |
| SIG+HSgFOBT 50-75, 5_3                   | 5,314                                                            | 3,531       | 0     | 2,132 | 237  | 11  | 21            | Dominated <sup>s</sup>        | ND                           | No                    |
| SIG+FIT 50-75, 10_1                      | 13,404                                                           | 2,079       | 0     | 2,289 | 256  | 12  | 23            | 25                            | Yes                          | Yes                   |
| SIG+HSgFOBT 50-75, 5_2                   | 6,949                                                            | 3,297       | 0     | 2,305 | 246  | 12  | 22            | Dominated <sup>s</sup>        | ND                           | No                    |
| SIG+HSgFOBT 50-75, 10_1                  | 11,376                                                           | 1,940       | 0     | 2,581 | 258  | 12  | 23            | Dominated <sup>s</sup>        | ND                           | Yes                   |
| <b>Computed tomographic colonography</b> |                                                                  |             |       |       |      |     |               |                               |                              |                       |
| CTC 50-75, 10                            | 0                                                                | 0           | 2,500 | 1,304 | 224  | 9   | 20            | 3                             | Yes                          | No                    |
| CTC 50-75, 5                             | 0                                                                | 0           | 4,254 | 1,654 | 248  | 10  | 22            | 14                            | Yes                          | No                    |

**eTable 13.** Outcomes for CRC screening strategies with screening from ages 50 to 75 years and the recommendable strategies<sup>a</sup> by model (shaded) when the colonoscopy strategy with a 5-year interval is the benchmark strategy (continued).

COL indicates colonoscopy; CRC, colorectal cancer; CRC-SPIN, CRC Simulated Population Model for Incidence and Natural History; CTC, computed tomographic colonography; FIT, fecal immunochemical test with positivity cutoff of  $\geq 100$  ng of hemoglobin (Hb) per mL of buffer ( $\geq 20$   $\mu\text{g}$  Hb/g of feces); FIT-DNA, multitarget stool DNA test (fecal immunochemical test with a DNA stool test); HSgFOBT, high-sensitivity guaiac-based fecal occult blood test; LYG, life-years gained compared with no screening; MISCAN, Microsimulation Screening Analysis; ND, indicates efficiency ratio is not defined because the strategy is not efficient or near-efficient; S, strategy is strongly dominated (ie, another strategy within the modality requires fewer colonoscopies and provides more LYG [eFigure 2]); SIG, flexible sigmoidoscopy; SimCRC, Simulation Model of CRC; W, strategy is weakly dominated (ie, another more burdensome strategy within the modality provides more LYG but requires fewer additional colonoscopies per additional LYG to achieve those gains [eFigure 2]) and does not meet the criterion for near-efficiency.

<sup>a</sup> The final set of model-recommendable strategies for this alternative benchmark are those recommendable by at least 2 models: COL 5 y (benchmark); FIT-DNA 1 y; and SIG 10 y + FIT 1 y.

<sup>b</sup> In cases where 2 screening intervals are listed (noted as X\_Y), the first interval listed is for SIG and the second interval listed is for the stool test.

<sup>c</sup> Efficiency ratios ( $\Delta\text{COL}/\Delta\text{LYG}$ ) are from the within-class analysis of all strategies with an age to begin screening 50 or 55 years and age to end screening 75, 80, or 85 years. See eTables 11-12 and 17-19.

<sup>d</sup> Indicates the strategy is near-efficient (ie, it is weakly dominated and its LYG are within 98% of the within-class efficient frontier).

<sup>e</sup> This strategy was not among the recommendable strategies with this model because an alternative within-class strategy also met the criteria for being a recommendable strategy and provided more LYG.

**eTable 14.** Sensitivity analysis: Percent change in outcomes compared to the base-case analysis for the set of model-recommendable strategies<sup>a</sup> using the worst-case and best-case sets of test characteristics,<sup>b</sup> by model.

| Modality<br>Age to begin-age to end (y),<br>interval (y) | Percent change in outcomes from base-case assumptions, by model |           |            |           |            |           |
|----------------------------------------------------------|-----------------------------------------------------------------|-----------|------------|-----------|------------|-----------|
|                                                          | SimCRC                                                          |           | MISCAN     |           | CRC-SPIN   |           |
|                                                          | Worst Case                                                      | Best Case | Worst Case | Best Case | Worst Case | Best Case |
| COL 50-75, 10                                            |                                                                 |           |            |           |            |           |
| Colonoscopies                                            | -1%                                                             | 1%        | -1%        | 1%        | -1%        | 1%        |
| Non-colonoscopy tests                                    | 0%                                                              | 0%        | 0%         | 0%        | 0%         | 0%        |
| Life-years gained                                        | -1%                                                             | 2%        | -2%        | 3%        | -2%        | 2%        |
| Complications                                            | -1%                                                             | 1%        | -1%        | 0%        | -1%        | 1%        |
| Colorectal cancer deaths averted                         | -1%                                                             | 2%        | -2%        | 2%        | -1%        | 1%        |
| FIT 50-75, 1                                             |                                                                 |           |            |           |            |           |
| Colonoscopies                                            | -5%                                                             | 5%        | -4%        | 3%        | -5%        | 5%        |
| Non-colonoscopy tests                                    | 1%                                                              | -1%       | 1%         | -1%       | 2%         | -2%       |
| Life-years gained                                        | -4%                                                             | 4%        | -6%        | 6%        | -5%        | 5%        |
| Complications                                            | -5%                                                             | 4%        | -3%        | 2%        | -5%        | 4%        |
| CRC deaths averted                                       | -4%                                                             | 4%        | -5%        | 5%        | -4%        | 4%        |
| SIG+FIT 50-75, 10_1 <sup>c</sup>                         |                                                                 |           |            |           |            |           |
| Colonoscopies                                            | -3%                                                             | 3%        | -2%        | 2%        | -4%        | 4%        |
| Non-colonoscopy tests                                    | 1%                                                              | -1%       | 1%         | -1%       | 2%         | -2%       |
| Life-years gained                                        | -2%                                                             | 3%        | -4%        | 4%        | -3%        | 3%        |
| Complications                                            | -3%                                                             | 3%        | -2%        | 1%        | -4%        | 3%        |
| Colorectal cancer deaths averted                         | -2%                                                             | 3%        | -3%        | 5%        | -3%        | 3%        |
| CTC 50-75, 5                                             |                                                                 |           |            |           |            |           |
| Colonoscopies                                            | -4%                                                             | 5%        | -3%        | 3%        | -3%        | 3%        |
| Non-colonoscopy tests                                    | 1%                                                              | -1%       | 1%         | -1%       | 1%         | -1%       |
| Life-years gained                                        | -4%                                                             | 4%        | -5%        | 7%        | -4%        | 4%        |
| Complications                                            | -3%                                                             | 4%        | -2%        | 2%        | -2%        | 2%        |
| Colorectal cancer deaths averted                         | -3%                                                             | 4%        | -5%        | 6%        | -4%        | 3%        |

COL indicates colonoscopy; CRC-SPIN, Colorectal Cancer Simulated Population Model for Incidence and Natural History; CTC, computed tomographic colonography; FIT, fecal immunochemical test with a positivity cutoff of  $\geq 100$  ng of hemoglobin (Hb) per mL of buffer ( $\geq 20$   $\mu$ g Hb/g of feces); MISCAN, Microsimulation Screening Analysis; SIG, flexible sigmoidoscopy; SimCRC, Simulation Model of CRC.

<sup>a</sup> With age to begin screening of 50 years and age to end screening of 75 years and the colonoscopy strategy with a 10-year interval as the benchmark.

<sup>b</sup> See Table 1 for base-case, best-case, and worst-case sets of test characteristics.

<sup>c</sup> The first interval listed is for SIG and the second interval listed is for FIT.

**eTable 15.** Sensitivity analysis: Outcomes for the benchmark and stool-based screening strategies<sup>a</sup> with screening from ages 50 to 75 years and the recommendable stool-based strategies by model (shaded) after the inclusion of FIT strategies with a lower cutoff for positivity. Within a class of screening modalities, strategies are ordered by the number of colonoscopies required.

| Model/strategy<br>Screening modality, age to begin-age to end (y), interval (y) | Outcomes per 1,000 40-year-olds |      |      |       |     |                |                    | Efficiency ratio <sup>b</sup> | Efficiency ratio < benchmark | LYG ≥90% of benchmark |
|---------------------------------------------------------------------------------|---------------------------------|------|------|-------|-----|----------------|--------------------|-------------------------------|------------------------------|-----------------------|
|                                                                                 | Stool tests                     | SIGs | CTCs | COLs  | LYG | Compli-cations | CRC deaths averted |                               |                              |                       |
| <b>SimCRC</b>                                                                   |                                 |      |      |       |     |                |                    |                               |                              |                       |
| <b>Colonoscopy</b>                                                              |                                 |      |      |       |     |                |                    |                               |                              |                       |
| COL 50-75, 10                                                                   | 0                               | 0    | 0    | 4,007 | 275 | 14             | 24                 | 55                            | Benchmark strategy           |                       |
| <b>Stool test</b>                                                               |                                 |      |      |       |     |                |                    |                               |                              |                       |
| FIT 50-75, 3                                                                    | 6,887                           | 0    | 0    | 971   | 212 | 6              | 18                 | 5                             | Yes                          | No                    |
| FIT 50-75, 2                                                                    | 9,326                           | 0    | 0    | 1,215 | 234 | 7              | 20                 | 12                            | Yes                          | No                    |
| HSgFOBT 50-75, 3                                                                | 6,456                           | 0    | 0    | 1,286 | 212 | 7              | 18                 | Dominated <sup>S</sup>        | ND                           | No                    |
| FIT-DNA 50-75, 5                                                                | 4,391                           | 0    | 0    | 1,364 | 224 | 8              | 20                 | Dominated <sup>S</sup>        | ND                           | No                    |
| FIT50 50-75, 3                                                                  | 6,339                           | 0    | 0    | 1,404 | 237 | 8              | 20                 | Dominated <sup>S</sup>        | ND                           | No                    |
| HSgFOBT 50-75, 2                                                                | 8,388                           | 0    | 0    | 1,597 | 235 | 9              | 20                 | Dominated <sup>S</sup>        | ND                           | No                    |
| FIT-DNA 50-75, 3                                                                | 5,990                           | 0    | 0    | 1,701 | 250 | 9              | 22                 | Dominated <sup>S</sup>        | ND                           | Yes                   |
| FIT50 50-75, 2                                                                  | 8,189                           | 0    | 0    | 1,711 | 253 | 9              | 22                 | Dominated <sup>S</sup>        | ND                           | Yes                   |
| FIT 50-75, 1                                                                    | 15,778                          | 0    | 0    | 1,739 | 260 | 10             | 23                 | 24 <sup>c</sup>               | Yes                          | Yes                   |
| HSgFOBT 50-75, 1                                                                | 12,914                          | 0    | 0    | 2,230 | 261 | 11             | 23                 | Dominated <sup>S</sup>        | ND                           | Yes                   |
| FIT50 50-75, 1                                                                  | 12,485                          | 0    | 0    | 2,326 | 268 | 11             | 24                 | 289 <sup>c</sup>              | No                           | Yes                   |
| FIT-DNA 50-75, 1                                                                | 11,041                          | 0    | 0    | 2,601 | 271 | 12             | 24                 | Dominated <sup>S</sup>        | ND                           | Yes                   |
| <b>MISCAN</b>                                                                   |                                 |      |      |       |     |                |                    |                               |                              |                       |
| <b>Colonoscopy</b>                                                              |                                 |      |      |       |     |                |                    |                               |                              |                       |
| COL 50-75, 10                                                                   | 0                               | 0    | 0    | 4,101 | 248 | 15             | 22                 | 39                            | Benchmark strategy           |                       |
| <b>Stool test</b>                                                               |                                 |      |      |       |     |                |                    |                               |                              |                       |
| FIT 50-75, 3                                                                    | 6,795                           | 0    | 0    | 995   | 176 | 7              | 15                 | 7                             | Yes                          | No                    |
| FIT 50-75, 2                                                                    | 9,342                           | 0    | 0    | 1,243 | 200 | 8              | 17                 | 12 <sup>c</sup>               | Yes                          | No                    |
| HSgFOBT 50-75, 3                                                                | 6,302                           | 0    | 0    | 1,296 | 175 | 8              | 15                 | Dominated <sup>S</sup>        | ND                           | No                    |
| FIT-DNA 50-75, 5                                                                | 4,380                           | 0    | 0    | 1,402 | 193 | 9              | 17                 | Dominated <sup>S</sup>        | ND                           | No                    |
| FIT50 50-75, 3                                                                  | 6,148                           | 0    | 0    | 1,437 | 200 | 8              | 17                 | Dominated                     | ND                           | No                    |
| HSgFOBT 50-75, 2                                                                | 8,408                           | 0    | 0    | 1,636 | 200 | 9              | 18                 | Dominated <sup>S</sup>        | ND                           | No                    |
| FIT-DNA 50-75, 3                                                                | 5,779                           | 0    | 0    | 1,714 | 215 | 9              | 19                 | Dominated <sup>S</sup>        | ND                           | No                    |
| FIT 50-75, 1                                                                    | 15,843                          | 0    | 0    | 1,757 | 231 | 10             | 20                 | 21 <sup>c</sup>               | Yes                          | Yes                   |
| FIT50 50-75, 2                                                                  | 8,164                           | 0    | 0    | 1,774 | 220 | 10             | 19                 | Dominated <sup>S</sup>        | ND                           | No                    |
| HSgFOBT 50-75, 1                                                                | 12,927                          | 0    | 0    | 2,287 | 232 | 11             | 20                 | Dominated                     | ND                           | Yes                   |
| FIT50 50-75, 1                                                                  | 12,425                          | 0    | 0    | 2,399 | 242 | 12             | 21                 | 265 <sup>c</sup>              | No                           | Yes                   |
| FIT-DNA 50-75, 1                                                                | 11,025                          | 0    | 0    | 2,662 | 246 | 12             | 21                 | Dominated                     | ND                           | Yes                   |
| <b>CRC-SPIN</b>                                                                 |                                 |      |      |       |     |                |                    |                               |                              |                       |
| <b>Colonoscopy</b>                                                              |                                 |      |      |       |     |                |                    |                               |                              |                       |
| COL 50-75, 10                                                                   | 0                               | 0    | 0    | 4,049 | 270 | 15             | 24                 | 65                            | Benchmark strategy           |                       |
| <b>Stool test</b>                                                               |                                 |      |      |       |     |                |                    |                               |                              |                       |
| FIT 50-75, 3                                                                    | 6,857                           | 0    | 0    | 1,081 | 178 | 7              | 16                 | 7                             | Yes                          | No                    |
| HSgFOBT 50-75, 3                                                                | 6,498                           | 0    | 0    | 1,317 | 183 | 8              | 16                 | Dominated <sup>S</sup>        | ND                           | No                    |
| FIT 50-75, 2                                                                    | 9,241                           | 0    | 0    | 1,346 | 207 | 9              | 18                 | 9                             | Yes                          | No                    |
| FIT-DNA 50-75, 5                                                                | 4,370                           | 0    | 0    | 1,473 | 195 | 9              | 18                 | Dominated <sup>S</sup>        | ND                           | No                    |
| FIT50 50-75, 3                                                                  | 6,322                           | 0    | 0    | 1,478 | 208 | 9              | 18                 | Dominated <sup>S</sup>        | ND                           | No                    |

**eTable 15.** Sensitivity analysis: Outcomes for the benchmark and stool-based screening strategies<sup>a</sup> with screening from ages 50 to 75 years and the recommendable stool-based strategies by model (shaded) after the inclusion of FIT strategies with a lower cutoff for positivity (continued).

| Model/strategy<br>Screening modality, age to begin-age to end (y), interval (y) | Outcomes per 1,000 40-year-olds |      |      |       |     |               |                    | Efficiency ratio <sup>b</sup> | Efficiency ratio < benchmark | LYG ≥90% of benchmark |
|---------------------------------------------------------------------------------|---------------------------------|------|------|-------|-----|---------------|--------------------|-------------------------------|------------------------------|-----------------------|
|                                                                                 | Stool tests                     | SIGs | CTCs | COLs  | LYG | Complications | CRC deaths averted |                               |                              |                       |
| <b>CRC-SPIN (continued)</b>                                                     |                                 |      |      |       |     |               |                    |                               |                              |                       |
| <b>Stool test</b>                                                               |                                 |      |      |       |     |               |                    |                               |                              |                       |
| HSgFOBT 50-75, 2                                                                | 8,448                           | 0    | 0    | 1,626 | 212 | 9             | 19                 | Dominated <sup>S</sup>        | ND                           | No                    |
| FIT50 50-75, 2                                                                  | 8,143                           | 0    | 0    | 1,784 | 230 | 10            | 20                 | Dominated <sup>W</sup>        | Yes                          | No                    |
| FIT-DNA 50-75, 3                                                                | 5,927                           | 0    | 0    | 1,827 | 226 | 10            | 20                 | Dominated <sup>S</sup>        | ND                           | No                    |
| FIT 50-75, 1                                                                    | 15,444                          | 0    | 0    | 1,899 | 244 | 11            | 22                 | 17                            | Yes                          | Yes                   |
| HSgFOBT 50-75, 1                                                                | 13,026                          | 0    | 0    | 2,253 | 247 | 11            | 22                 | Dominated <sup>S</sup>        | ND                           | Yes                   |
| FIT50 50-75, 1                                                                  | 12,339                          | 0    | 0    | 2,392 | 255 | 11            | 23                 | 208 <sup>c</sup>              | No                           | Yes                   |
| FIT-DNA 50-75, 1                                                                | 10,745                          | 0    | 0    | 2,729 | 261 | 13            | 23                 | Dominated <sup>S</sup>        | ND                           | Yes                   |

COL indicates colonoscopy; CRC, colorectal cancer; CRC-SPIN, CRC Simulated Population Model for Incidence and Natural History; CTC, computed tomographic colonography; FIT, fecal immunochemical test with a positivity cutoff of ≥100 ng of hemoglobin (Hb) per mL of buffer (≥20 µg Hb/g of feces); FIT50, fecal immunochemical test with a positivity cutoff of ≥50 ng of Hb per mL of buffer (≥10 µg Hb/g of feces); FIT-DNA, multitarget stool DNA test (fecal immunochemical test with a DNA stool test); HSgFOBT, high-sensitivity guaiac-based fecal occult blood test; LYG, life-years gained compared with no screening; MISCAN, Microsimulation Screening Analysis; ND, indicates efficiency ratio is not defined because the strategy is not efficient or near-efficient; S, strategy is strongly dominated (ie, another strategy within the modality requires fewer colonoscopies and provides more LYG [eFigure 2]); SIG, flexible sigmoidoscopy; SimCRC, Simulation Model of CRC; W, strategy is weakly dominated (ie, another more burdensome strategy within the modality provides more LYG gained but requires fewer additional colonoscopies per additional LYG to achieve those gains [eFigure 2]) and does not meet the criterion for near-efficiency; ΔCOL, incremental number of colonoscopies compared with the next-most effective non-dominated strategy; ΔLYG, incremental number of LYG compared with the next-most effective non-dominated strategy.

<sup>a</sup> FIT, FIT50, FIT-DNA, and HSgFOBT.

<sup>b</sup> Efficiency ratios (ΔCOL/ΔLYG) are from the within-class analysis of all strategies with an age to begin screening of 50 or 55 years and age to end screening of 75, 80, or 85 years and the benchmark strategy of COL 50-75, 10. See eTables 17 and 20.

<sup>c</sup> Indicates the strategy is near-efficient (ie, it is weakly dominated and its LYG are within 98% of the within-class efficient frontier).



**eTable 16.** Sensitivity analysis: Outcomes for CTC strategies with screening from ages 50 to 75 years, using the number of cathartic bowel preparations required as the measure of screening burden. With this measure, CTC every 5 years is not a model-recommendable strategy because its efficiency ratio exceeds that of the benchmark strategy. CTC every 10 years is not a model-recommendable strategy because the life-years gained are less than 90% of the benchmark strategy.

| Model/strategy<br>Screening modality,<br>age to begin-age to<br>end (y), interval (y) | Outcomes per 1,000 40-year-olds |       |                     |     |                    |                          | Efficiency ratio<br>( $\Delta$ cPREP /<br>$\Delta$ LYG) <sup>b</sup> | Efficiency ratio<br>< benchmark | LYG $\geq$ 90% of<br>benchmark |
|---------------------------------------------------------------------------------------|---------------------------------|-------|---------------------|-----|--------------------|--------------------------|----------------------------------------------------------------------|---------------------------------|--------------------------------|
|                                                                                       | CTCs                            | COLs  | cPREPs <sup>a</sup> | LYG | Compli-<br>cations | CRC<br>deaths<br>averted |                                                                      |                                 |                                |
| <b>SimCRC</b>                                                                         |                                 |       |                     |     |                    |                          |                                                                      |                                 |                                |
| <b>Colonoscopy</b>                                                                    |                                 |       |                     |     |                    |                          |                                                                      |                                 |                                |
| COL 50-75, 10                                                                         | 0                               | 4,007 | 4,007               | 275 | 14                 | 24                       | 55                                                                   |                                 | Benchmark strategy             |
| <b>Computed tomographic colonography</b>                                              |                                 |       |                     |     |                    |                          |                                                                      |                                 |                                |
| CTC 50-75, 10                                                                         | 2,458                           | 1,460 | 3,406               | 239 | 9                  | 21                       | 11                                                                   | Yes                             | No                             |
| CTC 50-75, 5                                                                          | 4,069                           | 1,927 | 5,238               | 265 | 11                 | 24                       | 71                                                                   | No                              | Yes                            |
| <b>MISCAN</b>                                                                         |                                 |       |                     |     |                    |                          |                                                                      |                                 |                                |
| <b>Colonoscopy</b>                                                                    |                                 |       |                     |     |                    |                          |                                                                      |                                 |                                |
| COL 50-75, 10                                                                         | 0                               | 4,101 | 4,101               | 248 | 15                 | 22                       | 39                                                                   |                                 | Benchmark strategy             |
| <b>Computed tomographic colonography</b>                                              |                                 |       |                     |     |                    |                          |                                                                      |                                 |                                |
| CTC 50-75, 10                                                                         | 2,485                           | 1,293 | 3,323               | 184 | 8                  | 16                       | 23                                                                   | Yes                             | No                             |
| CTC 50-75, 5                                                                          | 4,171                           | 1,743 | 5,224               | 226 | 10                 | 20                       | 45                                                                   | No                              | Yes                            |
| <b>CRC-SPIN</b>                                                                       |                                 |       |                     |     |                    |                          |                                                                      |                                 |                                |
| <b>Colonoscopy</b>                                                                    |                                 |       |                     |     |                    |                          |                                                                      |                                 |                                |
| COL 50-75, 10                                                                         | 0                               | 4,049 | 4,049               | 270 | 15                 | 24                       | 65                                                                   |                                 | Benchmark strategy             |
| <b>Computed tomographic colonography</b>                                              |                                 |       |                     |     |                    |                          |                                                                      |                                 |                                |
| CTC 50-75, 10                                                                         | 2,500                           | 1,304 | 3,344               | 224 | 9                  | 20                       | 16                                                                   | Yes                             | No                             |
| CTC 50-75, 5                                                                          | 4,254                           | 1,654 | 5,234               | 248 | 10                 | 22                       | 95                                                                   | No                              | Yes                            |

cPREPs indicates procedures with cathartic bowel preparation (ie, CTCs and colonoscopies); COL, colonoscopy; CRC, colorectal cancer; CRC-SPIN, CRC Simulated Population Model for Incidence and Natural History; CTC, computed tomographic colonography; LYG, life-years gained compared with no screening; MISCAN, Microsimulation Screening Analysis; SimCRC, Simulation Model of CRC;  $\Delta$ cPREP, incremental number of procedures requiring cathartic bowel preparation compared with the next-most effective non-dominated strategy;  $\Delta$ LYG, incremental number of LYG compared with the next-most effective non-dominated strategy.

<sup>a</sup> We assumed a follow-up colonoscopy, if required, is performed on the same day as the CTC. As a result, for CTC strategies, the number of cathartic bowel preparations is less than the sum of the number of CTCs and colonoscopies.

<sup>b</sup> Efficiency ratios are from the within-class analysis of all strategies with an age to begin screening of 50 or 55 years and age to end screening of 75, 80, or 85 years and the benchmark strategy of COL 50-75, 10 (shaded). See eTables 17 and 21.

**eTable 17.** Outcomes and efficiency ratios for colonoscopy screening strategies with an age to begin screening of 50 or 55 years. Strategies are ordered by the number of colonoscopies required.

| Model/strategy<br>Modality, age to begin-age to end (y), interval (y) | Outcomes over a lifetime per 1,000 40-year-olds |      |      |       |     |               |                    |              |              | Efficiency ratio <sup>a</sup><br>( $\Delta$ COL/ $\Delta$ LYG) |
|-----------------------------------------------------------------------|-------------------------------------------------|------|------|-------|-----|---------------|--------------------|--------------|--------------|----------------------------------------------------------------|
|                                                                       | Stool tests                                     | SIGs | CTCs | COLs  | LYG | Complications | CRC deaths averted | $\Delta$ COL | $\Delta$ LYG |                                                                |
| <b>SimCRC</b>                                                         |                                                 |      |      |       |     |               |                    |              |              |                                                                |
| COL 55-75, 15                                                         | 0                                               | 0    | 0    | 2,968 | 233 | 13            | 22                 | --           | --           | --                                                             |
| COL 50-75, 15                                                         | 0                                               | 0    | 0    | 3,187 | 260 | 12            | 23                 | 220          | 27           | 8                                                              |
| COL 55-85, 15                                                         | 0                                               | 0    | 0    | 3,262 | 234 | 17            | 23                 | ND           | ND           | Dominated <sup>S</sup>                                         |
| COL 55-75, 10                                                         | 0                                               | 0    | 0    | 3,635 | 243 | 16            | 23                 | ND           | ND           | Dominated <sup>S</sup>                                         |
| COL 50-80, 15                                                         | 0                                               | 0    | 0    | 3,656 | 265 | 16            | 24                 | 468          | 5            | 91 <sup>b</sup>                                                |
| COL 55-85, 10                                                         | 0                                               | 0    | 0    | 3,887 | 243 | 18            | 23                 | ND           | ND           | Dominated <sup>S</sup>                                         |
| COL 50-75, 10                                                         | 0                                               | 0    | 0    | 4,007 | 275 | 14            | 24                 | 820          | 15           | 55                                                             |
| COL 50-80, 10                                                         | 0                                               | 0    | 0    | 4,405 | 277 | 17            | 25                 | 398          | 2            | 166                                                            |
| COL 55-75, 5                                                          | 0                                               | 0    | 0    | 4,926 | 250 | 18            | 24                 | ND           | ND           | Dominated <sup>S</sup>                                         |
| COL 55-80, 5                                                          | 0                                               | 0    | 0    | 5,256 | 251 | 20            | 24                 | ND           | ND           | Dominated <sup>S</sup>                                         |
| COL 55-85, 5                                                          | 0                                               | 0    | 0    | 5,468 | 251 | 21            | 24                 | ND           | ND           | Dominated <sup>S</sup>                                         |
| COL 50-75, 5                                                          | 0                                               | 0    | 0    | 5,959 | 285 | 18            | 25                 | 1,554        | 8            | 188                                                            |
| COL 50-80, 5                                                          | 0                                               | 0    | 0    | 6,289 | 286 | 20            | 26                 | 330          | 1            | 513                                                            |
| COL 50-85, 5                                                          | 0                                               | 0    | 0    | 6,502 | 286 | 22            | 26                 | 213          | <1           | 1,661                                                          |
| <b>MISCAN</b>                                                         |                                                 |      |      |       |     |               |                    |              |              |                                                                |
| COL 55-75, 15                                                         | 0                                               | 0    | 0    | 3,079 | 214 | 14            | 20                 | --           | --           | --                                                             |
| COL 50-75, 15                                                         | 0                                               | 0    | 0    | 3,353 | 228 | 13            | 20                 | 275          | 14           | 19                                                             |
| COL 55-85, 15                                                         | 0                                               | 0    | 0    | 3,359 | 216 | 16            | 21                 | ND           | ND           | Dominated <sup>S</sup>                                         |
| COL 55-75, 10                                                         | 0                                               | 0    | 0    | 3,697 | 226 | 15            | 21                 | ND           | ND           | Dominated <sup>S</sup>                                         |
| COL 50-80, 15                                                         | 0                                               | 0    | 0    | 3,779 | 234 | 16            | 21                 | ND           | ND           | Dominated <sup>W</sup>                                         |
| COL 55-85, 10                                                         | 0                                               | 0    | 0    | 3,954 | 227 | 17            | 21                 | ND           | ND           | Dominated <sup>S</sup>                                         |
| COL 50-75, 10                                                         | 0                                               | 0    | 0    | 4,101 | 248 | 15            | 22                 | 747          | 19           | 39                                                             |
| COL 50-80, 10                                                         | 0                                               | 0    | 0    | 4,485 | 251 | 17            | 23                 | 384          | 3            | 116 <sup>b</sup>                                               |
| COL 55-75, 5                                                          | 0                                               | 0    | 0    | 4,923 | 238 | 17            | 22                 | ND           | ND           | Dominated <sup>S</sup>                                         |
| COL 55-80, 5                                                          | 0                                               | 0    | 0    | 5,271 | 239 | 19            | 22                 | ND           | ND           | Dominated <sup>S</sup>                                         |
| COL 55-85, 5                                                          | 0                                               | 0    | 0    | 5,500 | 239 | 20            | 22                 | ND           | ND           | Dominated <sup>S</sup>                                         |
| COL 50-75, 5                                                          | 0                                               | 0    | 0    | 5,948 | 264 | 18            | 23                 | 1,847        | 16           | 114                                                            |
| COL 50-80, 5                                                          | 0                                               | 0    | 0    | 6,296 | 265 | 20            | 24                 | 348          | 1            | 236                                                            |
| COL 50-85, 5                                                          | 0                                               | 0    | 0    | 6,525 | 266 | 21            | 24                 | 229          | <1           | 1,146                                                          |
| <b>CRC-SPIN</b>                                                       |                                                 |      |      |       |     |               |                    |              |              |                                                                |
| COL 55-75, 15                                                         | 0                                               | 0    | 0    | 3,015 | 236 | 14            | 22                 | --           | --           | --                                                             |
| COL 50-75, 15                                                         | 0                                               | 0    | 0    | 3,258 | 257 | 13            | 23                 | 243          | 21           | 12                                                             |
| COL 55-85, 15                                                         | 0                                               | 0    | 0    | 3,324 | 239 | 17            | 23                 | ND           | ND           | Dominated <sup>S</sup>                                         |
| COL 55-75, 10                                                         | 0                                               | 0    | 0    | 3,677 | 245 | 16            | 23                 | ND           | ND           | Dominated <sup>S</sup>                                         |
| COL 50-80, 15                                                         | 0                                               | 0    | 0    | 3,728 | 264 | 17            | 24                 | 470          | 7            | 72 <sup>b</sup>                                                |
| COL 55-85, 10                                                         | 0                                               | 0    | 0    | 3,949 | 246 | 19            | 24                 | ND           | ND           | Dominated <sup>S</sup>                                         |
| COL 50-75, 10                                                         | 0                                               | 0    | 0    | 4,049 | 270 | 15            | 24                 | 792          | 12           | 65                                                             |
| COL 50-80, 10                                                         | 0                                               | 0    | 0    | 4,464 | 273 | 18            | 25                 | 414          | 3            | 126                                                            |
| COL 55-75, 5                                                          | 0                                               | 0    | 0    | 4,966 | 251 | 18            | 24                 | ND           | ND           | Dominated <sup>S</sup>                                         |
| COL 55-80, 5                                                          | 0                                               | 0    | 0    | 5,322 | 252 | 20            | 24                 | ND           | ND           | Dominated <sup>S</sup>                                         |
| COL 55-85, 5                                                          | 0                                               | 0    | 0    | 5,557 | 253 | 22            | 24                 | ND           | ND           | Dominated <sup>S</sup>                                         |
| COL 50-75, 5                                                          | 0                                               | 0    | 0    | 5,995 | 279 | 19            | 25                 | 1,532        | 6            | 273                                                            |
| COL 50-80, 5                                                          | 0                                               | 0    | 0    | 6,351 | 280 | 21            | 25                 | 356          | 1            | 367                                                            |
| COL 50-85, 5                                                          | 0                                               | 0    | 0    | 6,586 | 280 | 22            | 25                 | 235          | <1           | 947                                                            |

COL indicates colonoscopy; CRC, colorectal cancer; CRC-SPIN, CRC Simulated Population Model for Incidence and Natural History; CTC, computed tomographic colonography; LYG, life-years gained compared with no screening; MISCAN, Microsimulation Screening Analysis; ND, indicates  $\Delta$ COL and  $\Delta$ LYG are not defined because the strategy was not an efficient or near-efficient option; S, strategy is strongly dominated (ie, another strategy within the modality requires fewer colonoscopies and provides more LYG [eFigure 2]); SIG, flexible sigmoidoscopy; SimCRC, Simulation Model of CRC; W, strategy is weakly dominated (ie, another more burdensome strategy within the modality provides more LYG but requires fewer additional colonoscopies per additional LYG to achieve those gains [eFigure 2]) and does not meet the criterion for near-efficiency;  $\Delta$ COL, incremental number of colonoscopies compared with the next-most effective non-dominated strategy;  $\Delta$ LYG, incremental number of LYG compared with the next-most effective non-dominated strategy.

<sup>a</sup> Due to rounding, efficiency ratio may not equal  $\Delta$ COL/ $\Delta$ LYG.

<sup>b</sup> Indicates the strategy is near-efficient (ie, it is weakly dominated and its LYG are within 98% of the within-class efficient frontier).

**eTable 18.** Outcomes and efficiency ratios for flexible sigmoidoscopy screening strategies with an age to begin screening of 50 or 55 years. Strategies are ordered by the number of colonoscopies required.

| Model/strategy  | Outcomes per 1,000 40-year-olds                     |             |      |       |      |     |               |                    |              | Efficiency ratio <sup>a</sup><br>( $\Delta$ COL/ $\Delta$ LYG) |
|-----------------|-----------------------------------------------------|-------------|------|-------|------|-----|---------------|--------------------|--------------|----------------------------------------------------------------|
|                 | Modality, age to begin-age to end (y), interval (y) | Stool tests | SIGs | CTCs  | COLs | LYG | Complications | CRC deaths averted | $\Delta$ COL |                                                                |
| <b>SimCRC</b>   |                                                     |             |      |       |      |     |               |                    |              |                                                                |
| SIG 55-75, 10   | 0                                                   | 2,277       | 0    | 1,267 | 177  | 9   | 17            | --                 | --           | --                                                             |
| SIG 50-75, 10   | 0                                                   | 2,480       | 0    | 1,345 | 200  | 8   | 18            | 78                 | 23           | 3                                                              |
| SIG 55-85, 10   | 0                                                   | 2,569       | 0    | 1,354 | 179  | 11  | 18            | ND                 | ND           | Dominated <sup>S</sup>                                         |
| SIG 50-80, 10   | 0                                                   | 2,910       | 0    | 1,484 | 205  | 10  | 19            | 139                | 5            | 28 <sup>b</sup>                                                |
| SIG 55-75, 5    | 0                                                   | 3,342       | 0    | 1,578 | 196  | 10  | 19            | ND                 | ND           | Dominated <sup>S</sup>                                         |
| SIG 55-80, 5    | 0                                                   | 3,692       | 0    | 1,669 | 198  | 11  | 20            | ND                 | ND           | Dominated <sup>S</sup>                                         |
| SIG 55-85, 5    | 0                                                   | 3,926       | 0    | 1,725 | 199  | 12  | 20            | ND                 | ND           | Dominated <sup>S</sup>                                         |
| SIG 50-75, 5    | 0                                                   | 4,111       | 0    | 1,820 | 227  | 10  | 21            | 475                | 27           | 18                                                             |
| SIG 50-80, 5    | 0                                                   | 4,459       | 0    | 1,910 | 229  | 11  | 21            | 90                 | 2            | 43                                                             |
| SIG 50-85, 5    | 0                                                   | 4,691       | 0    | 1,965 | 229  | 12  | 21            | 56                 | 1            | 99                                                             |
| <b>MISCAN</b>   |                                                     |             |      |       |      |     |               |                    |              |                                                                |
| SIG 55-75, 10   | 0                                                   | 2,155       | 0    | 1,736 | 185  | 11  | 18            | --                 | --           | --                                                             |
| SIG 55-85, 10   | 0                                                   | 2,425       | 0    | 1,806 | 186  | 12  | 18            | ND                 | ND           | Dominated <sup>W</sup>                                         |
| SIG 50-75, 10   | 0                                                   | 2,356       | 0    | 1,881 | 201  | 11  | 18            | 144                | 16           | 9                                                              |
| SIG 55-75, 5    | 0                                                   | 3,092       | 0    | 1,998 | 200  | 12  | 19            | ND                 | ND           | Dominated <sup>S</sup>                                         |
| SIG 50-80, 10   | 0                                                   | 2,746       | 0    | 2,001 | 205  | 12  | 19            | 120                | 4            | 28 <sup>b</sup>                                                |
| SIG 55-80, 5    | 0                                                   | 3,416       | 0    | 2,077 | 202  | 13  | 19            | ND                 | ND           | Dominated <sup>S</sup>                                         |
| SIG 55-85, 5    | 0                                                   | 3,637       | 0    | 2,120 | 202  | 13  | 20            | ND                 | ND           | Dominated <sup>S</sup>                                         |
| SIG 50-75, 5    | 0                                                   | 3,807       | 0    | 2,287 | 221  | 12  | 20            | 406                | 20           | 20                                                             |
| SIG 50-80, 5    | 0                                                   | 4,129       | 0    | 2,365 | 223  | 13  | 20            | 78                 | 2            | 37                                                             |
| SIG 50-85, 5    | 0                                                   | 4,349       | 0    | 2,408 | 224  | 14  | 21            | 42                 | <1           | 101                                                            |
| <b>CRC-SPIN</b> |                                                     |             |      |       |      |     |               |                    |              |                                                                |
| SIG 55-75, 10   | 0                                                   | 2,324       | 0    | 1,093 | 153  | 8   | 15            | --                 | --           | --                                                             |
| SIG 50-75, 10   | 0                                                   | 2,515       | 0    | 1,161 | 165  | 7   | 15            | 68                 | 12           | 6                                                              |
| SIG 55-85, 10   | 0                                                   | 2,649       | 0    | 1,168 | 155  | 9   | 15            | ND                 | ND           | Dominated <sup>S</sup>                                         |
| SIG 50-80, 10   | 0                                                   | 2,983       | 0    | 1,273 | 171  | 9   | 16            | 113                | 6            | 18                                                             |
| SIG 55-75, 5    | 0                                                   | 3,494       | 0    | 1,301 | 163  | 9   | 16            | ND                 | ND           | Dominated <sup>S</sup>                                         |
| SIG 55-80, 5    | 0                                                   | 3,902       | 0    | 1,377 | 166  | 9   | 16            | ND                 | ND           | Dominated <sup>S</sup>                                         |
| SIG 55-85, 5    | 0                                                   | 4,184       | 0    | 1,425 | 167  | 10  | 17            | ND                 | ND           | Dominated <sup>S</sup>                                         |
| SIG 50-75, 5    | 0                                                   | 4,298       | 0    | 1,493 | 181  | 9   | 16            | 220                | 10           | 22                                                             |
| SIG 50-80, 5    | 0                                                   | 4,705       | 0    | 1,567 | 184  | 10  | 17            | 74                 | 3            | 28                                                             |
| SIG 50-85, 5    | 0                                                   | 4,987       | 0    | 1,616 | 184  | 10  | 17            | 49                 | 1            | 71                                                             |

COL indicates colonoscopy; CRC, colorectal cancer; CRC-SPIN, CRC Simulated Population Model for Incidence and Natural History; CTC, computed tomographic colonography; LYG, life-years gained compared with no screening; MISCAN, Microsimulation Screening Analysis; ND, indicates  $\Delta$ COL and  $\Delta$ LYG are not defined because the strategy was not an efficient or near-efficient option; S, strategy is strongly dominated (ie, another strategy within the modality requires fewer colonoscopies and provides more LYG [eFigure 2]); SIG, flexible sigmoidoscopy; SimCRC, Simulation Model of CRC; W, strategy is weakly dominated (ie, another more burdensome strategy within the modality provides more LYG but requires fewer additional colonoscopies per additional LYG to achieve those gains [eFigure 2]) and does not meet the criterion for near-efficiency;  $\Delta$ COL, incremental number of colonoscopies compared with the next-most effective non-dominated strategy;  $\Delta$ LYG, incremental number of LYG compared with the next-most effective non-dominated strategy.

<sup>a</sup> Due to rounding, efficiency ratio may not equal  $\Delta$ COL/ $\Delta$ LYG.

<sup>b</sup> Indicates the strategy is near-efficient (ie, it is weakly dominated and its LYG are within 98% of the within-class efficient frontier).

**eTable 19.** Outcomes and efficiency ratios for CTC screening strategies with an age to begin screening of 50 or 55 years. Strategies are ordered by the number of colonoscopies required.

| Model/strategy  | Outcomes per 1,000 40-year-olds                     |             |       |       |      |     |               |                    |              | Efficiency ratio <sup>a</sup><br>( $\Delta$ COL/ $\Delta$ LYG) |
|-----------------|-----------------------------------------------------|-------------|-------|-------|------|-----|---------------|--------------------|--------------|----------------------------------------------------------------|
|                 | Modality, age to begin-age to end (y), interval (y) | Stool tests | SIGs  | CTCs  | COLs | LYG | Complications | CRC deaths averted | $\Delta$ COL |                                                                |
| <b>SimCRC</b>   |                                                     |             |       |       |      |     |               |                    |              |                                                                |
| CTC 55-75, 10   | 0                                                   | 0           | 2,250 | 1,396 | 214  | 10  | 21            | --                 | --           | --                                                             |
| CTC 50-75, 10   | 0                                                   | 0           | 2,458 | 1,460 | 239  | 9   | 21            | 64                 | 25           | 3                                                              |
| CTC 55-85, 10   | 0                                                   | 0           | 2,528 | 1,494 | 216  | 12  | 21            | ND                 | ND           | Dominated <sup>S</sup>                                         |
| CTC 50-80, 10   | 0                                                   | 0           | 2,874 | 1,615 | 245  | 11  | 22            | 155                | 6            | 26 <sup>b</sup>                                                |
| CTC 55-75, 5    | 0                                                   | 0           | 3,295 | 1,694 | 231  | 11  | 22            | ND                 | ND           | Dominated <sup>S</sup>                                         |
| CTC 55-80, 5    | 0                                                   | 0           | 3,631 | 1,788 | 233  | 12  | 23            | ND                 | ND           | Dominated <sup>S</sup>                                         |
| CTC 55-85, 5    | 0                                                   | 0           | 3,854 | 1,847 | 234  | 13  | 23            | ND                 | ND           | Dominated <sup>S</sup>                                         |
| CTC 50-75, 5    | 0                                                   | 0           | 4,069 | 1,927 | 265  | 11  | 24            | 467                | 26           | 18                                                             |
| CTC 50-80, 5    | 0                                                   | 0           | 4,405 | 2,021 | 267  | 12  | 24            | 94                 | 2            | 44                                                             |
| CTC 50-85, 5    | 0                                                   | 0           | 4,627 | 2,079 | 268  | 13  | 24            | 58                 | 1            | 111                                                            |
| <b>MISCAN</b>   |                                                     |             |       |       |      |     |               |                    |              |                                                                |
| CTC 55-75, 10   | 0                                                   | 0           | 2,284 | 1,220 | 172  | 9   | 16            | --                 | --           | --                                                             |
| CTC 55-85, 10   | 0                                                   | 0           | 2,590 | 1,292 | 175  | 10  | 17            | ND                 | ND           | Dominated <sup>W</sup>                                         |
| CTC 50-75, 10   | 0                                                   | 0           | 2,485 | 1,293 | 184  | 8   | 16            | 73                 | 12           | 6                                                              |
| CTC 50-80, 10   | 0                                                   | 0           | 2,927 | 1,405 | 194  | 9   | 18            | 112                | 10           | 12 <sup>b</sup>                                                |
| CTC 55-75, 5    | 0                                                   | 0           | 3,388 | 1,523 | 204  | 10  | 19            | 230                | 20           | 12 <sup>b</sup>                                                |
| CTC 55-80, 5    | 0                                                   | 0           | 3,759 | 1,598 | 208  | 11  | 20            | 305                | 24           | 13 <sup>b</sup>                                                |
| CTC 55-85, 5    | 0                                                   | 0           | 4,014 | 1,646 | 209  | 11  | 20            | ND                 | ND           | Dominated <sup>W</sup>                                         |
| CTC 50-75, 5    | 0                                                   | 0           | 4,171 | 1,743 | 226  | 10  | 20            | 450                | 42           | 11                                                             |
| CTC 50-80, 5    | 0                                                   | 0           | 4,539 | 1,817 | 230  | 11  | 21            | 74                 | 4            | 16                                                             |
| CTC 50-85, 5    | 0                                                   | 0           | 4,792 | 1,864 | 231  | 11  | 21            | 47                 | 1            | 37                                                             |
| <b>CRC-SPIN</b> |                                                     |             |       |       |      |     |               |                    |              |                                                                |
| CTC 55-75, 10   | 0                                                   | 0           | 2,296 | 1,265 | 209  | 9   | 20            | --                 | --           | --                                                             |
| CTC 50-75, 10   | 0                                                   | 0           | 2,500 | 1,304 | 224  | 9   | 20            | 39                 | 15           | 3                                                              |
| CTC 55-85, 10   | 0                                                   | 0           | 2,602 | 1,356 | 212  | 11  | 21            | ND                 | ND           | Dominated <sup>S</sup>                                         |
| CTC 50-80, 10   | 0                                                   | 0           | 2,948 | 1,442 | 234  | 11  | 21            | 138                | 10           | 14 <sup>b</sup>                                                |
| CTC 55-75, 5    | 0                                                   | 0           | 3,438 | 1,475 | 224  | 10  | 21            | ND                 | ND           | Dominated <sup>S</sup>                                         |
| CTC 55-80, 5    | 0                                                   | 0           | 3,822 | 1,560 | 228  | 11  | 22            | ND                 | ND           | Dominated <sup>S</sup>                                         |
| CTC 55-85, 5    | 0                                                   | 0           | 4,084 | 1,616 | 230  | 12  | 22            | ND                 | ND           | Dominated <sup>S</sup>                                         |
| CTC 50-75, 5    | 0                                                   | 0           | 4,254 | 1,654 | 248  | 10  | 22            | 350                | 24           | 14                                                             |
| CTC 50-80, 5    | 0                                                   | 0           | 4,638 | 1,739 | 252  | 11  | 23            | 85                 | 4            | 23                                                             |
| CTC 50-85, 5    | 0                                                   | 0           | 4,900 | 1,795 | 254  | 12  | 23            | 56                 | 2            | 29                                                             |

COL indicates colonoscopy; CRC, colorectal cancer; CRC-SPIN, CRC Simulated Population Model for Incidence and Natural History; CTC, computed tomographic colonography; LYG, life-years gained compared with no screening; MISCAN, Microsimulation Screening Analysis; ND, indicates  $\Delta$ COL and  $\Delta$ LYG are not defined because the strategy was not an efficient or near-efficient option; S, strategy is strongly dominated (ie, another strategy within the modality requires fewer colonoscopies and provides more LYG [eFigure 2]); SIG, flexible sigmoidoscopy; SimCRC, Simulation Model of CRC; W, strategy is weakly dominated (ie, another more burdensome strategy within the modality provides more LYG but requires fewer additional colonoscopies per additional LYG to achieve those gains [eFigure 2]) and does not meet the criterion for near-efficiency;  $\Delta$ COL, incremental number of colonoscopies compared with the next-most effective non-dominated strategy;  $\Delta$ LYG, incremental number of LYG compared with the next-most effective non-dominated strategy.

<sup>a</sup> Due to rounding, efficiency ratio may not equal  $\Delta$ COL/ $\Delta$ LYG.

<sup>b</sup> Indicates the strategy is near-efficient (ie, it is weakly dominated and its LYG are within 98% of the within-class efficient frontier).

**eTable 20.** Sensitivity analysis: Outcomes and efficiency ratios for stool-based screening strategies<sup>a</sup> with an age to begin screening of 50 or 55 years, with the inclusion of FIT strategies with a cutoff for positivity of  $\geq 50$  ng of hemoglobin (Hb) per mL of buffer ( $\geq 10$   $\mu\text{g}$  Hb/g of feces). Strategies are ordered by the number of colonoscopies required.

| Model/strategy<br>Screening modality,<br>age to begin-age to<br>end (y), interval (y) | Outcomes per 1,000 40-year-olds |      |      |       |     |                    |                          |                    |                    | Efficiency ratio <sup>b</sup><br>( $\Delta\text{COL}/\Delta\text{LYG}$ ) |
|---------------------------------------------------------------------------------------|---------------------------------|------|------|-------|-----|--------------------|--------------------------|--------------------|--------------------|--------------------------------------------------------------------------|
|                                                                                       | Stool<br>tests                  | SIGs | CTCs | COLs  | LYG | Compli-<br>cations | CRC<br>deaths<br>averted | $\Delta\text{COL}$ | $\Delta\text{LYG}$ |                                                                          |
| <b>SimCRC</b>                                                                         |                                 |      |      |       |     |                    |                          |                    |                    |                                                                          |
| FIT 55-75, 3                                                                          | 5,306                           | 0    | 0    | 807   | 178 | 6                  | 16                       | --                 | --                 | --                                                                       |
| FIT 55-80, 3                                                                          | 6,258                           | 0    | 0    | 907   | 190 | 7                  | 18                       | ND                 | ND                 | Dominated <sup>W</sup>                                                   |
| FIT 55-85, 3                                                                          | 6,837                           | 0    | 0    | 965   | 193 | 8                  | 19                       | ND                 | ND                 | Dominated <sup>W</sup>                                                   |
| FIT 50-75, 3                                                                          | 6,887                           | 0    | 0    | 971   | 212 | 6                  | 18                       | 164                | 34                 | 5                                                                        |
| HSgFOBT 55-75, 3                                                                      | 5,014                           | 0    | 0    | 1,052 | 178 | 7                  | 16                       | ND                 | ND                 | Dominated <sup>S</sup>                                                   |
| FIT 55-75, 2                                                                          | 7,616                           | 0    | 0    | 1,053 | 204 | 7                  | 19                       | ND                 | ND                 | Dominated <sup>S</sup>                                                   |
| FIT 50-80, 3                                                                          | 7,694                           | 0    | 0    | 1,055 | 220 | 8                  | 20                       | 84                 | 9                  | 10                                                                       |
| FIT 50-85, 3                                                                          | 8,111                           | 0    | 0    | 1,095 | 223 | 8                  | 20                       | 39                 | 2                  | 17 <sup>c</sup>                                                          |
| FIT 55-80, 2                                                                          | 8,455                           | 0    | 0    | 1,131 | 210 | 8                  | 20                       | ND                 | ND                 | Dominated <sup>S</sup>                                                   |
| FIT50 55-75, 3                                                                        | 4,923                           | 0    | 0    | 1,158 | 202 | 7                  | 18                       | ND                 | ND                 | Dominated <sup>S</sup>                                                   |
| FIT-DNA 55-75, 5                                                                      | 3,576                           | 0    | 0    | 1,171 | 194 | 8                  | 18                       | ND                 | ND                 | Dominated <sup>S</sup>                                                   |
| HSgFOBT 55-80, 3                                                                      | 5,872                           | 0    | 0    | 1,177 | 188 | 8                  | 18                       | ND                 | ND                 | Dominated <sup>S</sup>                                                   |
| FIT 55-85, 2                                                                          | 9,350                           | 0    | 0    | 1,208 | 214 | 10                 | 21                       | ND                 | ND                 | Dominated <sup>S</sup>                                                   |
| FIT 50-75, 2                                                                          | 9,326                           | 0    | 0    | 1,215 | 234 | 7                  | 20                       | 160                | 14                 | 12                                                                       |
| HSgFOBT 55-85, 3                                                                      | 6,352                           | 0    | 0    | 1,244 | 191 | 9                  | 19                       | ND                 | ND                 | Dominated <sup>S</sup>                                                   |
| FIT-DNA 55-80, 5                                                                      | 3,970                           | 0    | 0    | 1,255 | 199 | 9                  | 19                       | ND                 | ND                 | Dominated <sup>S</sup>                                                   |
| HSgFOBT 50-75, 3                                                                      | 6,456                           | 0    | 0    | 1,286 | 212 | 7                  | 18                       | ND                 | ND                 | Dominated <sup>S</sup>                                                   |
| FIT50 55-80, 3                                                                        | 5,751                           | 0    | 0    | 1,289 | 212 | 9                  | 20                       | ND                 | ND                 | Dominated <sup>S</sup>                                                   |
| FIT-DNA 55-85, 5                                                                      | 4,233                           | 0    | 0    | 1,310 | 200 | 10                 | 20                       | ND                 | ND                 | Dominated <sup>S</sup>                                                   |
| FIT 50-80, 2                                                                          | 10,572                          | 0    | 0    | 1,327 | 243 | 9                  | 22                       | 112                | 9                  | 13                                                                       |
| FIT50 55-85, 3                                                                        | 6,207                           | 0    | 0    | 1,359 | 214 | 10                 | 21                       | ND                 | ND                 | Dominated <sup>S</sup>                                                   |
| HSgFOBT 55-75, 2                                                                      | 6,897                           | 0    | 0    | 1,364 | 204 | 8                  | 19                       | ND                 | ND                 | Dominated <sup>S</sup>                                                   |
| FIT-DNA 50-75, 5                                                                      | 4,391                           | 0    | 0    | 1,364 | 224 | 8                  | 20                       | ND                 | ND                 | Dominated <sup>S</sup>                                                   |
| FIT 50-85, 2                                                                          | 11,165                          | 0    | 0    | 1,377 | 245 | 10                 | 22                       | 50                 | 2                  | 24 <sup>c</sup>                                                          |
| HSgFOBT 50-80, 3                                                                      | 7,125                           | 0    | 0    | 1,383 | 220 | 9                  | 20                       | ND                 | ND                 | Dominated <sup>S</sup>                                                   |
| FIT50 50-75, 3                                                                        | 6,339                           | 0    | 0    | 1,404 | 237 | 8                  | 20                       | ND                 | ND                 | Dominated <sup>S</sup>                                                   |
| FIT-DNA 55-75, 3                                                                      | 4,668                           | 0    | 0    | 1,415 | 214 | 9                  | 20                       | ND                 | ND                 | Dominated <sup>S</sup>                                                   |
| HSgFOBT 50-85, 3                                                                      | 7,565                           | 0    | 0    | 1,441 | 222 | 9                  | 20                       | ND                 | ND                 | Dominated <sup>S</sup>                                                   |
| FIT-DNA 50-80, 5                                                                      | 4,781                           | 0    | 0    | 1,447 | 229 | 9                  | 21                       | ND                 | ND                 | Dominated <sup>S</sup>                                                   |
| HSgFOBT 55-80, 2                                                                      | 7,622                           | 0    | 0    | 1,461 | 209 | 9                  | 20                       | ND                 | ND                 | Dominated <sup>S</sup>                                                   |
| FIT50 55-75, 2                                                                        | 6,725                           | 0    | 0    | 1,470 | 221 | 9                  | 21                       | ND                 | ND                 | Dominated <sup>S</sup>                                                   |
| FIT 55-75, 1                                                                          | 12,502                          | 0    | 0    | 1,478 | 226 | 9                  | 21                       | ND                 | ND                 | Dominated <sup>S</sup>                                                   |
| FIT-DNA 50-85, 5                                                                      | 5,043                           | 0    | 0    | 1,500 | 230 | 10                 | 21                       | ND                 | ND                 | Dominated <sup>S</sup>                                                   |
| FIT50 50-80, 3                                                                        | 6,978                           | 0    | 0    | 1,505 | 244 | 9                  | 22                       | ND                 | ND                 | Dominated <sup>S</sup>                                                   |
| HSgFOBT 55-85, 2                                                                      | 8,390                           | 0    | 0    | 1,558 | 212 | 11                 | 21                       | ND                 | ND                 | Dominated <sup>S</sup>                                                   |
| FIT-DNA 55-80, 3                                                                      | 5,410                           | 0    | 0    | 1,561 | 222 | 10                 | 21                       | ND                 | ND                 | Dominated <sup>S</sup>                                                   |
| FIT50 50-85, 3                                                                        | 7,411                           | 0    | 0    | 1,567 | 246 | 10                 | 22                       | ND                 | ND                 | Dominated <sup>W</sup>                                                   |
| FIT50 55-80, 2                                                                        | 7,422                           | 0    | 0    | 1,570 | 226 | 10                 | 21                       | ND                 | ND                 | Dominated <sup>S</sup>                                                   |
| HSgFOBT 50-75, 2                                                                      | 8,388                           | 0    | 0    | 1,597 | 235 | 9                  | 20                       | ND                 | ND                 | Dominated <sup>S</sup>                                                   |
| FIT 55-80, 1                                                                          | 14,163                          | 0    | 0    | 1,599 | 231 | 11                 | 22                       | ND                 | ND                 | Dominated <sup>S</sup>                                                   |

**eTable 20.** Sensitivity analysis: Outcomes and efficiency ratios for stool-based screening strategies<sup>a</sup> with an age to begin screening of 50 or 55 years, with the inclusion of FIT strategies with a cutoff for positivity of  $\geq 50$  ng of hemoglobin (Hb) per mL of buffer ( $\geq 10$   $\mu\text{g}$  Hb/g of feces) (continued).

| Model/strategy<br>Screening modality,<br>age to begin-age to<br>end (y), interval (y) | Outcomes per 1,000 40-year-olds |      |      |       |     |                    |                          |                    |                    | Efficiency ratio <sup>b</sup><br>( $\Delta\text{COL}/\Delta\text{LYG}$ ) |
|---------------------------------------------------------------------------------------|---------------------------------|------|------|-------|-----|--------------------|--------------------------|--------------------|--------------------|--------------------------------------------------------------------------|
|                                                                                       | Stool<br>tests                  | SIGs | CTCs | COLs  | LYG | Compli-<br>cations | CRC<br>deaths<br>averted | $\Delta\text{COL}$ | $\Delta\text{LYG}$ |                                                                          |
| <b>SimCRC (continued)</b>                                                             |                                 |      |      |       |     |                    |                          |                    |                    |                                                                          |
| FIT-DNA 55-85, 3                                                                      | 5,801                           | 0    | 0    | 1,634 | 223 | 11                 | 22                       | ND                 | ND                 | Dominated <sup>S</sup>                                                   |
| FIT50 55-85, 2                                                                        | 8,160                           | 0    | 0    | 1,670 | 228 | 11                 | 22                       | ND                 | ND                 | Dominated <sup>S</sup>                                                   |
| FIT 55-85, 1                                                                          | 15,332                          | 0    | 0    | 1,679 | 233 | 12                 | 23                       | ND                 | ND                 | Dominated <sup>S</sup>                                                   |
| FIT-DNA 50-75, 3                                                                      | 5,990                           | 0    | 0    | 1,701 | 250 | 9                  | 22                       | ND                 | ND                 | Dominated <sup>W</sup>                                                   |
| FIT50 50-75, 2                                                                        | 8,189                           | 0    | 0    | 1,711 | 253 | 9                  | 22                       | ND                 | ND                 | Dominated <sup>W</sup>                                                   |
| HSgFOBT 50-80, 2                                                                      | 9,462                           | 0    | 0    | 1,738 | 243 | 10                 | 22                       | ND                 | ND                 | Dominated <sup>S</sup>                                                   |
| FIT 50-75, 1                                                                          | 15,778                          | 0    | 0    | 1,739 | 260 | 10                 | 23                       | 413                | 17                 | 24 <sup>c</sup>                                                          |
| HSgFOBT 50-85, 2                                                                      | 9,970                           | 0    | 0    | 1,801 | 245 | 11                 | 22                       | ND                 | ND                 | Dominated <sup>S</sup>                                                   |
| FIT-DNA 50-80, 3                                                                      | 6,543                           | 0    | 0    | 1,809 | 255 | 10                 | 23                       | ND                 | ND                 | Dominated <sup>S</sup>                                                   |
| FIT50 50-80, 2                                                                        | 9,225                           | 0    | 0    | 1,858 | 260 | 11                 | 23                       | ND                 | ND                 | Dominated <sup>S</sup>                                                   |
| FIT 50-80, 1                                                                          | 17,426                          | 0    | 0    | 1,858 | 265 | 11                 | 24                       | 531                | 22                 | 24                                                                       |
| HSgFOBT 55-75, 1                                                                      | 10,357                          | 0    | 0    | 1,876 | 226 | 10                 | 21                       | ND                 | ND                 | Dominated <sup>S</sup>                                                   |
| FIT-DNA 50-85, 3                                                                      | 6,961                           | 0    | 0    | 1,884 | 257 | 11                 | 23                       | ND                 | ND                 | Dominated <sup>S</sup>                                                   |
| FIT50 50-85, 2                                                                        | 9,713                           | 0    | 0    | 1,923 | 261 | 11                 | 24                       | ND                 | ND                 | Dominated <sup>S</sup>                                                   |
| FIT 50-85, 1                                                                          | 18,589                          | 0    | 0    | 1,937 | 267 | 12                 | 24                       | 79                 | 2                  | 50                                                                       |
| FIT50 55-75, 1                                                                        | 10,000                          | 0    | 0    | 1,964 | 234 | 11                 | 22                       | ND                 | ND                 | Dominated <sup>S</sup>                                                   |
| HSgFOBT 55-80, 1                                                                      | 11,637                          | 0    | 0    | 2,025 | 231 | 12                 | 22                       | ND                 | ND                 | Dominated <sup>S</sup>                                                   |
| FIT50 55-80, 1                                                                        | 11,222                          | 0    | 0    | 2,116 | 238 | 12                 | 23                       | ND                 | ND                 | Dominated <sup>S</sup>                                                   |
| HSgFOBT 55-85, 1                                                                      | 12,539                          | 0    | 0    | 2,125 | 232 | 13                 | 23                       | ND                 | ND                 | Dominated <sup>S</sup>                                                   |
| FIT-DNA 55-75, 1                                                                      | 8,846                           | 0    | 0    | 2,206 | 237 | 11                 | 22                       | ND                 | ND                 | Dominated <sup>S</sup>                                                   |
| FIT50 55-85, 1                                                                        | 12,085                          | 0    | 0    | 2,218 | 239 | 13                 | 23                       | ND                 | ND                 | Dominated <sup>S</sup>                                                   |
| HSgFOBT 50-75, 1                                                                      | 12,914                          | 0    | 0    | 2,230 | 261 | 11                 | 23                       | ND                 | ND                 | Dominated <sup>S</sup>                                                   |
| FIT50 50-75, 1                                                                        | 12,485                          | 0    | 0    | 2,326 | 268 | 11                 | 24                       | 389                | 1                  | 289 <sup>c</sup>                                                         |
| FIT-DNA 55-80, 1                                                                      | 9,880                           | 0    | 0    | 2,367 | 240 | 13                 | 23                       | ND                 | ND                 | Dominated <sup>S</sup>                                                   |
| HSgFOBT 50-80, 1                                                                      | 14,193                          | 0    | 0    | 2,377 | 265 | 12                 | 24                       | ND                 | ND                 | Dominated <sup>S</sup>                                                   |
| FIT-DNA 55-85, 1                                                                      | 10,618                          | 0    | 0    | 2,475 | 241 | 14                 | 23                       | ND                 | ND                 | Dominated <sup>S</sup>                                                   |
| HSgFOBT 50-85, 1                                                                      | 15,090                          | 0    | 0    | 2,476 | 266 | 13                 | 24                       | ND                 | ND                 | Dominated <sup>S</sup>                                                   |
| FIT50 50-80, 1                                                                        | 13,711                          | 0    | 0    | 2,477 | 272 | 12                 | 24                       | 540                | 5                  | 104 <sup>c</sup>                                                         |
| FIT50 50-85, 1                                                                        | 14,568                          | 0    | 0    | 2,577 | 273 | 14                 | 25                       | 640                | 6                  | 100                                                                      |
| FIT-DNA 50-75, 1                                                                      | 11,041                          | 0    | 0    | 2,601 | 271 | 12                 | 24                       | ND                 | ND                 | Dominated <sup>S</sup>                                                   |
| FIT-DNA 50-80, 1                                                                      | 12,096                          | 0    | 0    | 2,763 | 274 | 13                 | 25                       | 186                | 1                  | 182 <sup>c</sup>                                                         |
| FIT-DNA 50-85, 1                                                                      | 12,826                          | 0    | 0    | 2,870 | 275 | 14                 | 25                       | 292                | 2                  | 151                                                                      |
| <b>MISCAN</b>                                                                         |                                 |      |      |       |     |                    |                          |                    |                    |                                                                          |
| FIT 55-75, 3                                                                          | 5,250                           | 0    | 0    | 833   | 153 | 6                  | 14                       | --                 | --                 | --                                                                       |
| FIT 55-80, 3                                                                          | 6,204                           | 0    | 0    | 917   | 165 | 7                  | 16                       | 84                 | 11                 | 7 <sup>c</sup>                                                           |
| FIT 55-85, 3                                                                          | 6,859                           | 0    | 0    | 967   | 169 | 8                  | 17                       | 134                | 15                 | 9 <sup>c</sup>                                                           |
| FIT 50-75, 3                                                                          | 6,795                           | 0    | 0    | 995   | 176 | 7                  | 15                       | 162                | 23                 | 7                                                                        |
| HSgFOBT 55-75, 3                                                                      | 4,912                           | 0    | 0    | 1,059 | 152 | 7                  | 14                       | ND                 | ND                 | Dominated <sup>S</sup>                                                   |
| FIT 50-80, 3                                                                          | 7,693                           | 0    | 0    | 1,070 | 186 | 8                  | 17                       | 75                 | 10                 | 8                                                                        |

**eTable 20.** Sensitivity analysis: Outcomes and efficiency ratios for stool-based screening strategies<sup>a</sup> with an age to begin screening of 50 or 55 years, with the inclusion of FIT strategies with a cutoff for positivity of  $\geq 50$  ng of hemoglobin (Hb) per mL of buffer ( $\geq 10$   $\mu$ g Hb/g of feces) (continued).

| Model/strategy<br>Screening modality,<br>age to begin-age to<br>end (y), interval (y) | Outcomes per 1,000 40-year-olds |      |      |       |     |                    |                          |              |              | Efficiency ratio <sup>b</sup><br>( $\Delta$ COL/ $\Delta$ LYG) |
|---------------------------------------------------------------------------------------|---------------------------------|------|------|-------|-----|--------------------|--------------------------|--------------|--------------|----------------------------------------------------------------|
|                                                                                       | Stool<br>tests                  | SIGs | CTCs | COLs  | LYG | Compli-<br>cations | CRC<br>deaths<br>averted | $\Delta$ COL | $\Delta$ LYG |                                                                |
| <b>MISCAN (continued)</b>                                                             |                                 |      |      |       |     |                    |                          |              |              |                                                                |
| FIT 55-75, 2                                                                          | 7,644                           | 0    | 0    | 1,075 | 179 | 8                  | 16                       | ND           | ND           | Dominated <sup>S</sup>                                         |
| FIT 50-85, 3                                                                          | 8,032                           | 0    | 0    | 1,096 | 188 | 8                  | 17                       | 26           | 2            | 12 <sup>c</sup>                                                |
| FIT 55-80, 2                                                                          | 8,501                           | 0    | 0    | 1,139 | 186 | 8                  | 18                       | ND           | ND           | Dominated <sup>S</sup>                                         |
| HSgFOBT 55-80, 3                                                                      | 5,773                           | 0    | 0    | 1,170 | 163 | 8                  | 16                       | ND           | ND           | Dominated <sup>S</sup>                                         |
| FIT50 55-75, 3                                                                        | 4,790                           | 0    | 0    | 1,190 | 175 | 8                  | 16                       | ND           | ND           | Dominated <sup>S</sup>                                         |
| FIT 55-85, 2                                                                          | 9,437                           | 0    | 0    | 1,201 | 190 | 9                  | 18                       | ND           | ND           | Dominated <sup>W</sup>                                         |
| FIT-DNA 55-75, 5                                                                      | 3,574                           | 0    | 0    | 1,203 | 172 | 8                  | 16                       | ND           | ND           | Dominated <sup>S</sup>                                         |
| HSgFOBT 55-85, 3                                                                      | 6,359                           | 0    | 0    | 1,238 | 166 | 9                  | 16                       | ND           | ND           | Dominated <sup>S</sup>                                         |
| FIT 50-75, 2                                                                          | 9,342                           | 0    | 0    | 1,243 | 200 | 8                  | 17                       | 173          | 15           | 12 <sup>c</sup>                                                |
| FIT-DNA 55-80, 5                                                                      | 3,974                           | 0    | 0    | 1,275 | 178 | 9                  | 17                       | ND           | ND           | Dominated <sup>S</sup>                                         |
| HSgFOBT 50-75, 3                                                                      | 6,302                           | 0    | 0    | 1,296 | 175 | 8                  | 15                       | ND           | ND           | Dominated <sup>S</sup>                                         |
| FIT50 55-80, 3                                                                        | 5,614                           | 0    | 0    | 1,304 | 186 | 9                  | 18                       | ND           | ND           | Dominated <sup>S</sup>                                         |
| FIT-DNA 55-85, 5                                                                      | 4,248                           | 0    | 0    | 1,320 | 179 | 10                 | 18                       | ND           | ND           | Dominated <sup>S</sup>                                         |
| FIT 50-80, 2                                                                          | 10,613                          | 0    | 0    | 1,334 | 210 | 9                  | 19                       | 264          | 24           | 11                                                             |
| FIT50 55-85, 3                                                                        | 6,175                           | 0    | 0    | 1,374 | 189 | 10                 | 18                       | ND           | ND           | Dominated <sup>S</sup>                                         |
| FIT 50-85, 2                                                                          | 11,233                          | 0    | 0    | 1,375 | 213 | 9                  | 19                       | 40           | 3            | 16                                                             |
| HSgFOBT 55-75, 2                                                                      | 6,940                           | 0    | 0    | 1,386 | 178 | 9                  | 17                       | ND           | ND           | Dominated <sup>S</sup>                                         |
| HSgFOBT 50-80, 3                                                                      | 7,106                           | 0    | 0    | 1,395 | 184 | 9                  | 17                       | ND           | ND           | Dominated <sup>S</sup>                                         |
| FIT-DNA 50-75, 5                                                                      | 4,380                           | 0    | 0    | 1,402 | 193 | 9                  | 17                       | ND           | ND           | Dominated <sup>S</sup>                                         |
| HSgFOBT 50-85, 3                                                                      | 7,408                           | 0    | 0    | 1,430 | 186 | 9                  | 17                       | ND           | ND           | Dominated <sup>S</sup>                                         |
| FIT-DNA 55-75, 3                                                                      | 4,509                           | 0    | 0    | 1,431 | 190 | 9                  | 17                       | ND           | ND           | Dominated <sup>S</sup>                                         |
| FIT50 50-75, 3                                                                        | 6,148                           | 0    | 0    | 1,437 | 200 | 8                  | 17                       | ND           | ND           | Dominated <sup>S</sup>                                         |
| HSgFOBT 55-80, 2                                                                      | 7,678                           | 0    | 0    | 1,472 | 184 | 9                  | 18                       | ND           | ND           | Dominated <sup>S</sup>                                         |
| FIT-DNA 50-80, 5                                                                      | 4,776                           | 0    | 0    | 1,472 | 198 | 9                  | 18                       | ND           | ND           | Dominated <sup>S</sup>                                         |
| FIT 55-75, 1                                                                          | 12,586                          | 0    | 0    | 1,490 | 206 | 9                  | 19                       | ND           | ND           | Dominated <sup>S</sup>                                         |
| FIT50 55-75, 2                                                                        | 6,724                           | 0    | 0    | 1,516 | 198 | 9                  | 18                       | ND           | ND           | Dominated <sup>S</sup>                                         |
| FIT-DNA 50-85, 5                                                                      | 5,048                           | 0    | 0    | 1,516 | 200 | 10                 | 19                       | ND           | ND           | Dominated <sup>S</sup>                                         |
| FIT50 50-80, 3                                                                        | 6,920                           | 0    | 0    | 1,540 | 208 | 9                  | 19                       | ND           | ND           | Dominated <sup>S</sup>                                         |
| HSgFOBT 55-85, 2                                                                      | 8,478                           | 0    | 0    | 1,557 | 188 | 11                 | 18                       | ND           | ND           | Dominated <sup>S</sup>                                         |
| FIT-DNA 55-80, 3                                                                      | 5,260                           | 0    | 0    | 1,557 | 199 | 10                 | 19                       | ND           | ND           | Dominated <sup>S</sup>                                         |
| FIT50 50-85, 3                                                                        | 7,209                           | 0    | 0    | 1,575 | 210 | 10                 | 19                       | ND           | ND           | Dominated <sup>S</sup>                                         |
| FIT 55-80, 1                                                                          | 14,313                          | 0    | 0    | 1,592 | 213 | 10                 | 20                       | ND           | ND           | Dominated <sup>W</sup>                                         |
| FIT50 55-80, 2                                                                        | 7,430                           | 0    | 0    | 1,603 | 203 | 10                 | 19                       | ND           | ND           | Dominated <sup>S</sup>                                         |
| FIT-DNA 55-85, 3                                                                      | 5,771                           | 0    | 0    | 1,634 | 202 | 11                 | 19                       | ND           | ND           | Dominated <sup>S</sup>                                         |
| HSgFOBT 50-75, 2                                                                      | 8,408                           | 0    | 0    | 1,636 | 200 | 9                  | 18                       | ND           | ND           | Dominated <sup>S</sup>                                         |
| FIT 55-85, 1                                                                          | 15,566                          | 0    | 0    | 1,659 | 215 | 11                 | 21                       | ND           | ND           | Dominated <sup>W</sup>                                         |
| FIT50 55-85, 2                                                                        | 8,195                           | 0    | 0    | 1,690 | 207 | 11                 | 20                       | ND           | ND           | Dominated <sup>S</sup>                                         |
| FIT-DNA 50-75, 3                                                                      | 5,779                           | 0    | 0    | 1,714 | 215 | 9                  | 19                       | ND           | ND           | Dominated <sup>S</sup>                                         |
| FIT 50-75, 1                                                                          | 15,843                          | 0    | 0    | 1,757 | 231 | 10                 | 20                       | 383          | 18           | 21 <sup>c</sup>                                                |
| HSgFOBT 50-80, 2                                                                      | 9,497                           | 0    | 0    | 1,759 | 209 | 10                 | 19                       | ND           | ND           | Dominated <sup>S</sup>                                         |

**eTable 20.** Sensitivity analysis: Outcomes and efficiency ratios for stool-based screening strategies<sup>a</sup> with an age to begin screening of 50 or 55 years, with the inclusion of FIT strategies with a cutoff for positivity of  $\geq 50$  ng of hemoglobin (Hb) per mL of buffer ( $\geq 10$   $\mu$ g Hb/g of feces) (continued).

| Model/strategy<br>Screening modality,<br>age to begin-age to<br>end (y), interval (y) | Outcomes per 1,000 40-year-olds |      |      |       |     |                    |                          |              |              | Efficiency ratio <sup>b</sup><br>( $\Delta$ COL/ $\Delta$ LYG) |
|---------------------------------------------------------------------------------------|---------------------------------|------|------|-------|-----|--------------------|--------------------------|--------------|--------------|----------------------------------------------------------------|
|                                                                                       | Stool<br>tests                  | SIGs | CTCs | COLs  | LYG | Compli-<br>cations | CRC<br>deaths<br>averted | $\Delta$ COL | $\Delta$ LYG |                                                                |
| <b>MISCAN (continued)</b>                                                             |                                 |      |      |       |     |                    |                          |              |              |                                                                |
| FIT50 50-75, 2                                                                        | 8,164                           | 0    | 0    | 1,774 | 220 | 10                 | 19                       | ND           | ND           | Dominated <sup>S</sup>                                         |
| HSgFOBT 50-85, 2                                                                      | 10,024                          | 0    | 0    | 1,814 | 211 | 11                 | 19                       | ND           | ND           | Dominated <sup>S</sup>                                         |
| FIT-DNA 50-80, 3                                                                      | 6,481                           | 0    | 0    | 1,828 | 223 | 11                 | 20                       | ND           | ND           | Dominated <sup>S</sup>                                         |
| FIT 50-80, 1                                                                          | 17,552                          | 0    | 0    | 1,855 | 238 | 11                 | 21                       | 481          | 25           | 19                                                             |
| FIT-DNA 50-85, 3                                                                      | 6,745                           | 0    | 0    | 1,867 | 224 | 11                 | 20                       | ND           | ND           | Dominated <sup>S</sup>                                         |
| FIT50 50-80, 2                                                                        | 9,208                           | 0    | 0    | 1,899 | 228 | 11                 | 20                       | ND           | ND           | Dominated <sup>S</sup>                                         |
| HSgFOBT 55-75, 1                                                                      | 10,427                          | 0    | 0    | 1,913 | 206 | 11                 | 19                       | ND           | ND           | Dominated <sup>S</sup>                                         |
| FIT 50-85, 1                                                                          | 18,796                          | 0    | 0    | 1,921 | 240 | 11                 | 22                       | 66           | 2            | 27                                                             |
| FIT50 50-85, 2                                                                        | 9,713                           | 0    | 0    | 1,956 | 230 | 11                 | 21                       | ND           | ND           | Dominated <sup>S</sup>                                         |
| FIT50 55-75, 1                                                                        | 9,995                           | 0    | 0    | 2,020 | 216 | 11                 | 20                       | ND           | ND           | Dominated <sup>S</sup>                                         |
| HSgFOBT 55-80, 1                                                                      | 11,733                          | 0    | 0    | 2,047 | 212 | 12                 | 20                       | ND           | ND           | Dominated <sup>S</sup>                                         |
| HSgFOBT 55-85, 1                                                                      | 12,679                          | 0    | 0    | 2,137 | 214 | 13                 | 20                       | ND           | ND           | Dominated <sup>S</sup>                                         |
| FIT50 55-80, 1                                                                        | 11,239                          | 0    | 0    | 2,154 | 222 | 12                 | 21                       | ND           | ND           | Dominated <sup>S</sup>                                         |
| FIT50 55-85, 1                                                                        | 12,145                          | 0    | 0    | 2,245 | 223 | 13                 | 21                       | ND           | ND           | Dominated <sup>S</sup>                                         |
| FIT-DNA 55-75, 1                                                                      | 8,874                           | 0    | 0    | 2,252 | 221 | 12                 | 20                       | ND           | ND           | Dominated <sup>S</sup>                                         |
| HSgFOBT 50-75, 1                                                                      | 12,927                          | 0    | 0    | 2,287 | 232 | 11                 | 20                       | ND           | ND           | Dominated <sup>S</sup>                                         |
| FIT-DNA 55-80, 1                                                                      | 9,943                           | 0    | 0    | 2,394 | 226 | 13                 | 21                       | ND           | ND           | Dominated <sup>S</sup>                                         |
| FIT50 50-75, 1                                                                        | 12,425                          | 0    | 0    | 2,399 | 242 | 12                 | 21                       | 477          | 2            | 265 <sup>c</sup>                                               |
| HSgFOBT 50-80, 1                                                                      | 14,223                          | 0    | 0    | 2,416 | 237 | 12                 | 21                       | ND           | ND           | Dominated <sup>S</sup>                                         |
| FIT-DNA 55-85, 1                                                                      | 10,733                          | 0    | 0    | 2,493 | 227 | 14                 | 21                       | ND           | ND           | Dominated <sup>S</sup>                                         |
| HSgFOBT 50-85, 1                                                                      | 15,161                          | 0    | 0    | 2,505 | 239 | 13                 | 22                       | ND           | ND           | Dominated <sup>S</sup>                                         |
| FIT50 50-80, 1                                                                        | 13,666                          | 0    | 0    | 2,530 | 247 | 13                 | 22                       | 609          | 7            | 89 <sup>c</sup>                                                |
| FIT50 50-85, 1                                                                        | 14,564                          | 0    | 0    | 2,620 | 249 | 13                 | 22                       | 699          | 9            | 81                                                             |
| FIT-DNA 50-75, 1                                                                      | 11,025                          | 0    | 0    | 2,662 | 246 | 12                 | 21                       | ND           | ND           | Dominated <sup>S</sup>                                         |
| FIT-DNA 50-80, 1                                                                      | 12,108                          | 0    | 0    | 2,804 | 250 | 13                 | 22                       | 184          | 2            | 104 <sup>c</sup>                                               |
| FIT-DNA 50-85, 1                                                                      | 12,888                          | 0    | 0    | 2,901 | 252 | 14                 | 22                       | 281          | 3            | 88                                                             |
| <b>CRC-SPIN</b>                                                                       |                                 |      |      |       |     |                    |                          |              |              |                                                                |
| FIT 55-75, 3                                                                          | 5,301                           | 0    | 0    | 895   | 152 | 7                  | 14                       | --           | --           | --                                                             |
| FIT 55-80, 3                                                                          | 6,254                           | 0    | 0    | 995   | 164 | 8                  | 16                       | 99           | 12           | 8 <sup>c</sup>                                                 |
| FIT 55-85, 3                                                                          | 6,836                           | 0    | 0    | 1,051 | 168 | 9                  | 17                       | ND           | ND           | Dominated <sup>W</sup>                                         |
| FIT 50-75, 3                                                                          | 6,857                           | 0    | 0    | 1,081 | 178 | 7                  | 16                       | 186          | 26           | 7                                                              |
| HSgFOBT 55-75, 3                                                                      | 5,053                           | 0    | 0    | 1,082 | 156 | 7                  | 15                       | ND           | ND           | Dominated <sup>S</sup>                                         |
| FIT 55-75, 2                                                                          | 7,575                           | 0    | 0    | 1,160 | 183 | 8                  | 17                       | 79           | 5            | 15 <sup>c</sup>                                                |
| FIT 50-80, 3                                                                          | 7,660                           | 0    | 0    | 1,163 | 187 | 8                  | 17                       | 82           | 9            | 9 <sup>c</sup>                                                 |
| FIT 50-85, 3                                                                          | 8,084                           | 0    | 0    | 1,201 | 191 | 9                  | 18                       | 120          | 13           | 10 <sup>c</sup>                                                |
| HSgFOBT 55-80, 3                                                                      | 5,932                           | 0    | 0    | 1,204 | 167 | 9                  | 16                       | ND           | ND           | Dominated <sup>S</sup>                                         |
| FIT50 55-75, 3                                                                        | 4,922                           | 0    | 0    | 1,222 | 179 | 8                  | 17                       | ND           | ND           | Dominated <sup>S</sup>                                         |
| FIT 55-80, 2                                                                          | 8,410                           | 0    | 0    | 1,237 | 190 | 9                  | 18                       | ND           | ND           | Dominated <sup>S</sup>                                         |
| FIT-DNA 55-75, 5                                                                      | 3,570                           | 0    | 0    | 1,261 | 172 | 9                  | 16                       | ND           | ND           | Dominated <sup>S</sup>                                         |



**eTable 20.** Sensitivity analysis: Outcomes and efficiency ratios for stool-based screening strategies<sup>a</sup> with an age to begin screening of 50 or 55 years, with the inclusion of FIT strategies with a cutoff for positivity of  $\geq 50$  ng of hemoglobin (Hb) per mL of buffer ( $\geq 10$   $\mu\text{g}$  Hb/g of feces) (continued).

| Model/strategy<br>Screening modality,<br>age to begin-age to<br>end (y), interval (y) | Outcomes per 1,000 40-year-olds |      |      |       |     |                    |                          |                    |                    | Efficiency ratio <sup>b</sup><br>( $\Delta\text{COL}/\Delta\text{LYG}$ ) |
|---------------------------------------------------------------------------------------|---------------------------------|------|------|-------|-----|--------------------|--------------------------|--------------------|--------------------|--------------------------------------------------------------------------|
|                                                                                       | Stool<br>tests                  | SIGs | CTCs | COLs  | LYG | Compli-<br>cations | CRC<br>deaths<br>averted | $\Delta\text{COL}$ | $\Delta\text{LYG}$ |                                                                          |
| <b>CRC-SPIN (continued)</b>                                                           |                                 |      |      |       |     |                    |                          |                    |                    |                                                                          |
| HSgFOBT 55-85, 3                                                                      | 6,429                           | 0    | 0    | 1,269 | 171 | 10                 | 17                       | ND                 | ND                 | Dominated <sup>S</sup>                                                   |
| FIT 55-85, 2                                                                          | 9,309                           | 0    | 0    | 1,313 | 196 | 10                 | 19                       | ND                 | ND                 | Dominated <sup>W</sup>                                                   |
| HSgFOBT 50-75, 3                                                                      | 6,498                           | 0    | 0    | 1,317 | 183 | 8                  | 16                       | ND                 | ND                 | Dominated <sup>S</sup>                                                   |
| FIT-DNA 55-80, 5                                                                      | 3,967                           | 0    | 0    | 1,343 | 177 | 10                 | 18                       | ND                 | ND                 | Dominated <sup>S</sup>                                                   |
| FIT 50-75, 2                                                                          | 9,241                           | 0    | 0    | 1,346 | 207 | 9                  | 18                       | 265                | 29                 | 9                                                                        |
| FIT50 55-80, 3                                                                        | 5,754                           | 0    | 0    | 1,351 | 190 | 9                  | 18                       | ND                 | ND                 | Dominated <sup>S</sup>                                                   |
| HSgFOBT 55-75, 2                                                                      | 6,959                           | 0    | 0    | 1,394 | 187 | 9                  | 18                       | ND                 | ND                 | Dominated <sup>S</sup>                                                   |
| FIT-DNA 55-85, 5                                                                      | 4,235                           | 0    | 0    | 1,397 | 180 | 11                 | 18                       | ND                 | ND                 | Dominated <sup>S</sup>                                                   |
| HSgFOBT 50-80, 3                                                                      | 7,184                           | 0    | 0    | 1,412 | 192 | 9                  | 18                       | ND                 | ND                 | Dominated <sup>S</sup>                                                   |
| FIT50 55-85, 3                                                                        | 6,216                           | 0    | 0    | 1,418 | 194 | 10                 | 19                       | ND                 | ND                 | Dominated <sup>S</sup>                                                   |
| FIT 50-80, 2                                                                          | 10,476                          | 0    | 0    | 1,454 | 218 | 10                 | 20                       | 108                | 10                 | 10                                                                       |
| HSgFOBT 50-85, 3                                                                      | 7,643                           | 0    | 0    | 1,466 | 195 | 10                 | 18                       | ND                 | ND                 | Dominated <sup>S</sup>                                                   |
| FIT-DNA 50-75, 5                                                                      | 4,370                           | 0    | 0    | 1,473 | 195 | 9                  | 18                       | ND                 | ND                 | Dominated <sup>S</sup>                                                   |
| FIT50 50-75, 3                                                                        | 6,322                           | 0    | 0    | 1,478 | 208 | 9                  | 18                       | ND                 | ND                 | Dominated <sup>S</sup>                                                   |
| HSgFOBT 55-80, 2                                                                      | 7,706                           | 0    | 0    | 1,487 | 194 | 10                 | 19                       | ND                 | ND                 | Dominated <sup>S</sup>                                                   |
| FIT 50-85, 2                                                                          | 11,071                          | 0    | 0    | 1,504 | 220 | 11                 | 20                       | 49                 | 2                  | 24 <sup>c</sup>                                                          |
| FIT-DNA 55-75, 3                                                                      | 4,640                           | 0    | 0    | 1,520 | 197 | 10                 | 19                       | ND                 | ND                 | Dominated <sup>S</sup>                                                   |
| FIT50 55-75, 2                                                                        | 6,705                           | 0    | 0    | 1,529 | 205 | 9                  | 19                       | ND                 | ND                 | Dominated <sup>S</sup>                                                   |
| FIT-DNA 50-80, 5                                                                      | 4,762                           | 0    | 0    | 1,554 | 200 | 10                 | 19                       | ND                 | ND                 | Dominated <sup>S</sup>                                                   |
| FIT50 50-80, 3                                                                        | 6,961                           | 0    | 0    | 1,574 | 216 | 10                 | 20                       | ND                 | ND                 | Dominated <sup>S</sup>                                                   |
| HSgFOBT 55-85, 2                                                                      | 8,513                           | 0    | 0    | 1,581 | 198 | 11                 | 20                       | ND                 | ND                 | Dominated <sup>S</sup>                                                   |
| FIT-DNA 50-85, 5                                                                      | 5,028                           | 0    | 0    | 1,606 | 203 | 11                 | 19                       | ND                 | ND                 | Dominated <sup>S</sup>                                                   |
| FIT 55-75, 1                                                                          | 12,290                          | 0    | 0    | 1,611 | 217 | 10                 | 20                       | ND                 | ND                 | Dominated <sup>S</sup>                                                   |
| FIT50 55-80, 2                                                                        | 7,407                           | 0    | 0    | 1,625 | 211 | 10                 | 20                       | ND                 | ND                 | Dominated <sup>S</sup>                                                   |
| HSgFOBT 50-75, 2                                                                      | 8,448                           | 0    | 0    | 1,626 | 212 | 9                  | 19                       | ND                 | ND                 | Dominated <sup>S</sup>                                                   |
| FIT50 50-85, 3                                                                        | 7,404                           | 0    | 0    | 1,635 | 218 | 11                 | 20                       | ND                 | ND                 | Dominated <sup>S</sup>                                                   |
| FIT-DNA 55-80, 3                                                                      | 5,379                           | 0    | 0    | 1,663 | 206 | 11                 | 20                       | ND                 | ND                 | Dominated <sup>S</sup>                                                   |
| FIT50 55-85, 2                                                                        | 8,159                           | 0    | 0    | 1,723 | 215 | 12                 | 21                       | ND                 | ND                 | Dominated <sup>S</sup>                                                   |
| FIT 55-80, 1                                                                          | 13,929                          | 0    | 0    | 1,729 | 224 | 12                 | 21                       | ND                 | ND                 | Dominated <sup>W</sup>                                                   |
| FIT-DNA 55-85, 3                                                                      | 5,774                           | 0    | 0    | 1,734 | 209 | 12                 | 21                       | ND                 | ND                 | Dominated <sup>S</sup>                                                   |
| HSgFOBT 50-80, 2                                                                      | 9,554                           | 0    | 0    | 1,763 | 221 | 10                 | 20                       | ND                 | ND                 | Dominated <sup>S</sup>                                                   |
| FIT50 50-75, 2                                                                        | 8,143                           | 0    | 0    | 1,784 | 230 | 10                 | 20                       | ND                 | ND                 | Dominated <sup>W</sup>                                                   |
| FIT 55-85, 1                                                                          | 15,093                          | 0    | 0    | 1,809 | 226 | 13                 | 22                       | ND                 | ND                 | Dominated <sup>S</sup>                                                   |
| HSgFOBT 50-85, 2                                                                      | 10,089                          | 0    | 0    | 1,824 | 223 | 11                 | 21                       | ND                 | ND                 | Dominated <sup>S</sup>                                                   |
| FIT-DNA 50-75, 3                                                                      | 5,927                           | 0    | 0    | 1,827 | 226 | 10                 | 20                       | ND                 | ND                 | Dominated <sup>S</sup>                                                   |
| HSgFOBT 55-75, 1                                                                      | 10,467                          | 0    | 0    | 1,899 | 219 | 11                 | 21                       | ND                 | ND                 | Dominated <sup>S</sup>                                                   |
| FIT 50-75, 1                                                                          | 15,444                          | 0    | 0    | 1,899 | 244 | 11                 | 22                       | 445                | 26                 | 17                                                                       |
| FIT50 50-80, 2                                                                        | 9,183                           | 0    | 0    | 1,926 | 238 | 11                 | 22                       | ND                 | ND                 | Dominated <sup>S</sup>                                                   |
| FIT-DNA 50-80, 3                                                                      | 6,476                           | 0    | 0    | 1,931 | 232 | 11                 | 21                       | ND                 | ND                 | Dominated <sup>S</sup>                                                   |
| FIT50 50-85, 2                                                                        | 9,684                           | 0    | 0    | 1,989 | 241 | 12                 | 22                       | ND                 | ND                 | Dominated <sup>S</sup>                                                   |

**eTable 20.** Sensitivity analysis: Outcomes and efficiency ratios for stool-based screening strategies<sup>a</sup> with an age to begin screening of 50 or 55 years, with the inclusion of FIT strategies with a cutoff for positivity of  $\geq 50$  ng of hemoglobin (Hb) per mL of buffer ( $\geq 10$   $\mu\text{g}$  Hb/g of feces) (continued).

| Model/strategy<br>Screening modality,<br>age to begin-age to<br>end (y), interval (y) | Outcomes per 1,000 40-year-olds |      |      |       |     |                    |                          |                    |                    | Efficiency ratio <sup>b</sup><br>( $\Delta\text{COL}/\Delta\text{LYG}$ ) |
|---------------------------------------------------------------------------------------|---------------------------------|------|------|-------|-----|--------------------|--------------------------|--------------------|--------------------|--------------------------------------------------------------------------|
|                                                                                       | Stool<br>tests                  | SIGs | CTCs | COLs  | LYG | Compli-<br>cations | CRC<br>deaths<br>averted | $\Delta\text{COL}$ | $\Delta\text{LYG}$ |                                                                          |
| <b>CRC-SPIN (continued)</b>                                                           |                                 |      |      |       |     |                    |                          |                    |                    |                                                                          |
| FIT-DNA 50-85, 3                                                                      | 6,903                           | 0    | 0    | 2,005 | 235 | 12                 | 22                       | ND                 | ND                 | Dominated <sup>S</sup>                                                   |
| FIT 50-80, 1                                                                          | 17,062                          | 0    | 0    | 2,013 | 250 | 12                 | 23                       | 114                | 6                  | 18                                                                       |
| FIT50 55-75, 1                                                                        | 9,915                           | 0    | 0    | 2,018 | 228 | 11                 | 21                       | ND                 | ND                 | Dominated <sup>S</sup>                                                   |
| HSgFOBT 55-80, 1                                                                      | 11,806                          | 0    | 0    | 2,043 | 224 | 12                 | 22                       | ND                 | ND                 | Dominated <sup>S</sup>                                                   |
| FIT 50-85, 1                                                                          | 18,224                          | 0    | 0    | 2,091 | 253 | 13                 | 23                       | 78                 | 3                  | 26                                                                       |
| HSgFOBT 55-85, 1                                                                      | 12,765                          | 0    | 0    | 2,143 | 227 | 13                 | 22                       | ND                 | ND                 | Dominated <sup>S</sup>                                                   |
| FIT50 55-80, 1                                                                        | 11,146                          | 0    | 0    | 2,165 | 233 | 12                 | 22                       | ND                 | ND                 | Dominated <sup>S</sup>                                                   |
| HSgFOBT 50-75, 1                                                                      | 13,026                          | 0    | 0    | 2,253 | 247 | 11                 | 22                       | ND                 | ND                 | Dominated <sup>S</sup>                                                   |
| FIT50 55-85, 1                                                                        | 12,037                          | 0    | 0    | 2,267 | 235 | 14                 | 23                       | ND                 | ND                 | Dominated <sup>S</sup>                                                   |
| FIT-DNA 55-75, 1                                                                      | 8,647                           | 0    | 0    | 2,315 | 234 | 12                 | 22                       | ND                 | ND                 | Dominated <sup>S</sup>                                                   |
| FIT50 50-75, 1                                                                        | 12,339                          | 0    | 0    | 2,392 | 255 | 11                 | 23                       | 301                | 1                  | 208 <sup>c</sup>                                                         |
| HSgFOBT 50-80, 1                                                                      | 14,364                          | 0    | 0    | 2,395 | 252 | 12                 | 23                       | ND                 | ND                 | Dominated <sup>S</sup>                                                   |
| FIT-DNA 55-80, 1                                                                      | 9,673                           | 0    | 0    | 2,471 | 238 | 14                 | 23                       | ND                 | ND                 | Dominated <sup>S</sup>                                                   |
| HSgFOBT 50-85, 1                                                                      | 15,321                          | 0    | 0    | 2,493 | 255 | 14                 | 23                       | ND                 | ND                 | Dominated <sup>S</sup>                                                   |
| FIT50 50-80, 1                                                                        | 13,575                          | 0    | 0    | 2,537 | 260 | 13                 | 23                       | 446                | 7                  | 69 <sup>c</sup>                                                          |
| FIT-DNA 55-85, 1                                                                      | 10,427                          | 0    | 0    | 2,582 | 239 | 15                 | 23                       | ND                 | ND                 | Dominated <sup>S</sup>                                                   |
| FIT50 50-85, 1                                                                        | 14,460                          | 0    | 0    | 2,638 | 262 | 14                 | 24                       | 547                | 9                  | 62                                                                       |
| FIT-DNA 50-75, 1                                                                      | 10,745                          | 0    | 0    | 2,729 | 261 | 13                 | 23                       | ND                 | ND                 | Dominated <sup>S</sup>                                                   |
| FIT-DNA 50-80, 1                                                                      | 11,795                          | 0    | 0    | 2,886 | 265 | 14                 | 24                       | 249                | 3                  | 96 <sup>c</sup>                                                          |
| FIT-DNA 50-85, 1                                                                      | 12,542                          | 0    | 0    | 2,994 | 266 | 15                 | 24                       | 357                | 4                  | 83                                                                       |

COL indicates colonoscopy; CRC, colorectal cancer; CRC-SPIN, CRC Simulated Population Model for Incidence and Natural History; CTC, computed tomographic colonography; FIT, fecal immunochemical test with a positivity cutoff of  $\geq 100$  ng of hemoglobin (Hb) per mL of buffer ( $\geq 20$   $\mu\text{g}$  Hb/g of feces); FIT50, fecal immunochemical test with a positivity cutoff of  $\geq 50$  ng of Hb per mL of buffer ( $\geq 10$   $\mu\text{g}$  Hb/g of feces); FIT-DNA, multitarget stool DNA test (fecal immunochemical test with a DNA stool test); HSgFOBT, high-sensitivity guaiac-based fecal occult blood test; LYG, life-years gained compared with no screening; MISCAN, Microsimulation Screening Analysis; ND, indicates  $\Delta\text{COL}$  and  $\Delta\text{LYG}$  are not defined because the strategy was not an efficient or near-efficient option; S, strategy is strongly dominated (ie, another strategy within the modality requires fewer colonoscopies and provides more LYG [eFigure 2]); SIG, flexible sigmoidoscopy; SimCRC, Simulation Model of CRC; W, strategy is weakly dominated (ie, another more burdensome strategy within the modality provides more LYG gained but requires fewer additional colonoscopies per additional LYG to achieve those gains [eFigure 2]) and does not meet the criterion for near-efficiency;  $\Delta\text{COL}$ , incremental number of colonoscopies compared with the next-most effective non-dominated strategy;  $\Delta\text{LYG}$ , incremental number of LYG compared with the next-most effective non-dominated strategy.

<sup>a</sup> FIT, FIT50, FIT-DNA, and HSgFOBT.

<sup>b</sup> Due to rounding, efficiency ratio may not equal  $\Delta\text{COL}/\Delta\text{LYG}$ .

<sup>c</sup> Indicates the strategy is near-efficient (ie, it is weakly dominated and its LYG are within 98% of the within-class efficient frontier).

**eTable 21.** Sensitivity analysis: Outcomes and efficiency ratios for CTC screening strategies with an age to begin screening of 50 or 55 years, using the number of procedures requiring cathartic bowel preparation as the measure of the burden of screening. Persons with a positive CTC are assumed to undergo same-day follow-up colonoscopy, thereby eliminating the need for an additional bowel preparation. Strategies are ordered by the number of colonoscopies required.

| Model/strategy  | Outcomes per 1,000 40-year-olds |       |        |     |               |                    |                |              | Efficiency ratio <sup>a</sup><br>( $\Delta$ cPREP/ $\Delta$ LYG) |
|-----------------|---------------------------------|-------|--------|-----|---------------|--------------------|----------------|--------------|------------------------------------------------------------------|
|                 | CTCs                            | COLs  | cPREPs | LYG | Complications | CRC deaths averted | $\Delta$ cPREP | $\Delta$ LYG |                                                                  |
| <b>SimCRC</b>   |                                 |       |        |     |               |                    |                |              |                                                                  |
| CTC 55-75, 10   | 2,250                           | 1,396 | 3,134  | 214 | 10            | 21                 | --             | --           | --                                                               |
| CTC 50-75, 10   | 2,458                           | 1,460 | 3,406  | 239 | 9             | 21                 | 272            | 25           | 11                                                               |
| CTC 55-85, 10   | 2,528                           | 1,494 | 3,439  | 216 | 12            | 21                 | ND             | ND           | Dominated <sup>S</sup>                                           |
| CTC 50-80, 10   | 2,874                           | 1,615 | 3,872  | 245 | 11            | 22                 | 571            | 6            | 96 <sup>b</sup>                                                  |
| CTC 55-75, 5    | 3,295                           | 1,694 | 4,331  | 231 | 11            | 22                 | ND             | ND           | Dominated <sup>S</sup>                                           |
| CTC 55-80, 5    | 3,631                           | 1,788 | 4,694  | 233 | 12            | 23                 | ND             | ND           | Dominated <sup>S</sup>                                           |
| CTC 55-85, 5    | 3,854                           | 1,847 | 4,931  | 234 | 13            | 23                 | ND             | ND           | Dominated <sup>S</sup>                                           |
| CTC 50-75, 5    | 4,069                           | 1,927 | 5,238  | 265 | 11            | 24                 | 1,832          | 26           | 71                                                               |
| CTC 50-80, 5    | 4,405                           | 2,021 | 5,600  | 267 | 12            | 24                 | 362            | 2            | 168                                                              |
| CTC 50-85, 5    | 4,627                           | 2,079 | 5,836  | 268 | 13            | 24                 | 236            | 1            | 451                                                              |
| <b>MISCAN</b>   |                                 |       |        |     |               |                    |                |              |                                                                  |
| CTC 55-75, 10   | 2,284                           | 1,220 | 3,058  | 172 | 9             | 16                 | --             | --           | --                                                               |
| CTC 50-75, 10   | 2,485                           | 1,293 | 3,323  | 184 | 8             | 16                 | 265            | 12           | 23                                                               |
| CTC 55-85, 10   | 2,590                           | 1,292 | 3,379  | 175 | 10            | 17                 | ND             | ND           | Dominated <sup>S</sup>                                           |
| CTC 50-80, 10   | 2,927                           | 1,405 | 3,793  | 194 | 9             | 18                 | 553            | 10           | 57 <sup>b</sup>                                                  |
| CTC 55-75, 5    | 3,388                           | 1,523 | 4,317  | 204 | 10            | 19                 | 1,133          | 20           | 58 <sup>b</sup>                                                  |
| CTC 55-80, 5    | 3,759                           | 1,598 | 4,704  | 208 | 11            | 20                 | ND             | ND           | Dominated <sup>W</sup>                                           |
| CTC 55-85, 5    | 4,014                           | 1,646 | 4,967  | 209 | 11            | 20                 | ND             | ND           | Dominated <sup>W</sup>                                           |
| CTC 50-75, 5    | 4,171                           | 1,743 | 5,224  | 226 | 10            | 20                 | 1,901          | 42           | 45                                                               |
| CTC 50-80, 5    | 4,539                           | 1,817 | 5,608  | 230 | 11            | 21                 | 384            | 4            | 85                                                               |
| CTC 50-85, 5    | 4,792                           | 1,864 | 5,869  | 231 | 11            | 21                 | 261            | 1            | 207                                                              |
| <b>CRC-SPIN</b> |                                 |       |        |     |               |                    |                |              |                                                                  |
| CTC 55-75, 10   | 2,296                           | 1,265 | 3,102  | 209 | 9             | 20                 | --             | --           | --                                                               |
| CTC 50-75, 10   | 2,500                           | 1,304 | 3,344  | 224 | 9             | 20                 | 242            | 15           | 16                                                               |
| CTC 55-85, 10   | 2,602                           | 1,356 | 3,432  | 212 | 11            | 21                 | ND             | ND           | Dominated <sup>S</sup>                                           |
| CTC 50-80, 10   | 2,948                           | 1,442 | 3,836  | 234 | 11            | 21                 | 492            | 10           | 51                                                               |
| CTC 55-75, 5    | 3,438                           | 1,475 | 4,330  | 224 | 10            | 21                 | ND             | ND           | Dominated <sup>S</sup>                                           |
| CTC 55-80, 5    | 3,822                           | 1,560 | 4,736  | 228 | 11            | 22                 | ND             | ND           | Dominated <sup>S</sup>                                           |
| CTC 55-85, 5    | 4,084                           | 1,616 | 5,011  | 230 | 12            | 22                 | ND             | ND           | Dominated <sup>S</sup>                                           |
| CTC 50-75, 5    | 4,254                           | 1,654 | 5,234  | 248 | 10            | 22                 | 1,398          | 15           | 95                                                               |
| CTC 50-80, 5    | 4,638                           | 1,739 | 5,640  | 252 | 11            | 23                 | 406            | 4            | 108                                                              |
| CTC 50-85, 5    | 4,900                           | 1,795 | 5,914  | 254 | 12            | 23                 | 274            | 2            | 142                                                              |

cPREP indicates procedures with cathartic bowel preparation (ie, CTCs and colonoscopies); COL, colonoscopy; CRC, colorectal cancer; CRC-SPIN, CRC Simulated Population Model for Incidence and Natural History; CTC, computed tomographic colonography; LYG, life-years gained compared with no screening; MISCAN, Microsimulation Screening Analysis; ND, indicates  $\Delta$ COL and  $\Delta$ LYG are not defined because the strategy was not an efficient or near-efficient option; S, strategy is strongly dominated (ie, another strategy within the modality requires fewer colonoscopies and provides more LYG [eFigure 2]); SimCRC, Simulation Model of CRC; W, strategy is weakly dominated (ie, another more burdensome strategy within the modality provides more LYG but requires fewer additional colonoscopies per additional LYG to achieve those gains [eFigure 2]) and does not meet the criterion for near-efficiency;  $\Delta$ cPREP, incremental number of procedures requiring cathartic bowel preparation compared with the next-most effective non-dominated strategy;  $\Delta$ LYG, incremental number of LYG compared with the next-most effective non-dominated strategy.

<sup>a</sup> Due to rounding, efficiency ratio may not equal  $\Delta$ cPREP/ $\Delta$ LYG.

<sup>b</sup> Indicates the strategy is near-efficient (ie, it is weakly dominated and its LYG are within 98% of the within-class efficient frontier).

**eFigure 1.** Age-specific risks of complications from colonoscopy with polypectomy used in the analysis. Complications include serious gastrointestinal events, other gastrointestinal events, and cardiovascular events.

We assume that the only harms from screening arise from a colonoscopy with polypectomy, whether it be for screening, follow-up, or surveillance, or for the diagnosis of a symptomatic cancer. We assume no risk of harms from stool-based tests, flexible sigmoidoscopy, or computed tomographic colonography, nor from bowel preparation.<sup>3</sup> The risks of complications from colonoscopy are from an analysis by van Hees et al.,<sup>4</sup> which was an extension of an analysis by Warren et al.<sup>5</sup> In those studies, colonoscopy without polypectomy was not associated with an excess risk of complications, relative to a matched control group that did not have colonoscopy.

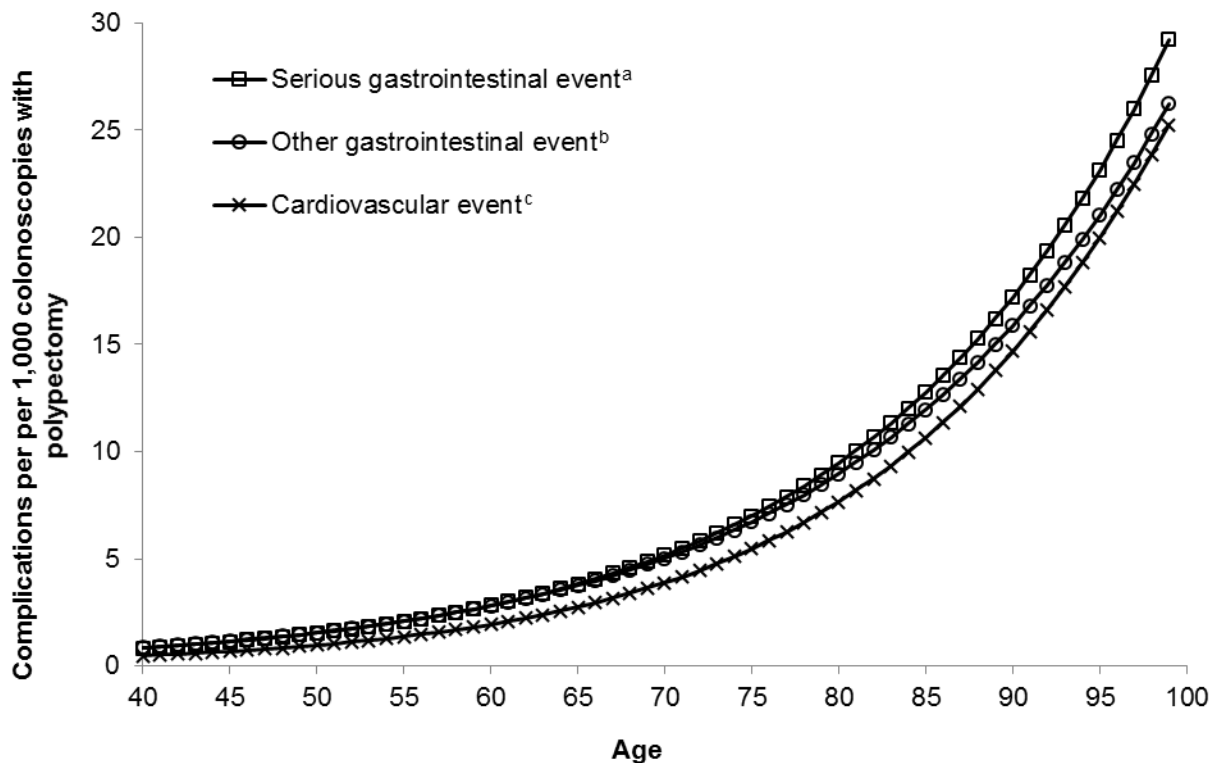

<sup>a</sup> Perforations, gastrointestinal bleeding or transfusions. Excess risk per colonoscopy with polypectomy =  $1/[\exp(9.27953 - 0.06105 \times \text{Age}) + 1] - 1/[\exp(10.78719 - 0.06105 \times \text{Age}) + 1]$ .

<sup>b</sup> Paralytic ileus, nausea and vomiting, dehydration, abdominal pain. Excess risk per colonoscopy with polypectomy =  $1/[\exp(8.81404 - 0.05903 \times \text{Age}) + 1] - 1/[\exp(9.61197 - 0.05903 \times \text{Age}) + 1]$ .

<sup>c</sup> Myocardial infarction or angina, arrhythmias, congestive heart failure, cardiac or respiratory arrest, syncope, hypotension, or shock. Excess risk per colonoscopy with polypectomy =  $1/[\exp(9.09053 - 0.07056 \times \text{Age}) + 1] - 1/[\exp(9.38297 - 0.07056 \times \text{Age}) + 1]$ .

**eFigure 2.** Example of the assessment of near-efficiency for weakly dominated strategies.

Each strategy is represented by a point on the graph below. The solid black line is the efficient frontier connecting the efficient strategies (ie, strategies A-D); strategies that fall below the line are dominated. The lower annotated strategy is strongly dominated, that is, it yields fewer life-years gained and has a larger colonoscopy burden than Strategy B. The annotated strategy in the middle is weakly dominated; that is, another more burdensome strategy, Strategy C, provides more LYG but requires fewer additional colonoscopies per additional LYG to achieve those gains. However, we deem it “near-efficient” because it meets our criterion for having life-years gained within 98% of the efficient frontier. The upper annotated strategy is weakly dominated and is not “near-efficient” because its life-years gained are less than 98% of the efficient frontier. Near-efficiency was only assessed for weakly dominated strategies.

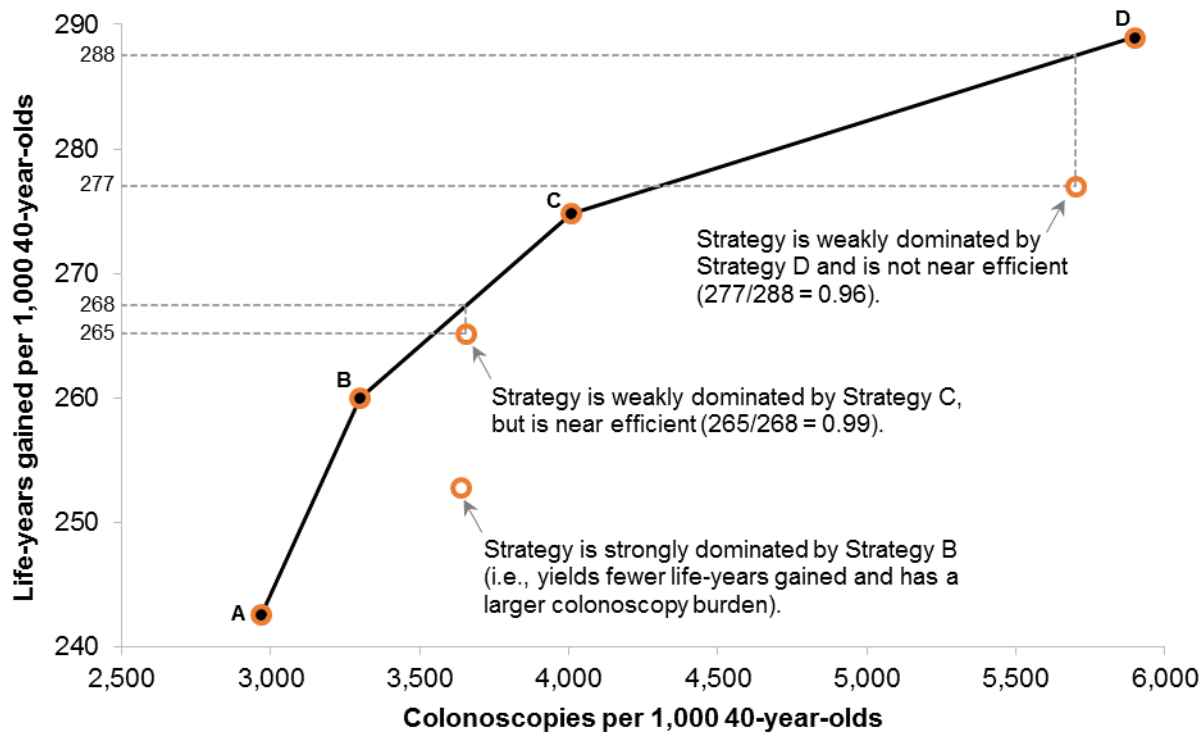

**eFigure 3.** Lifetime number of colonoscopies and LYG for a cohort of 40-year-olds for HSgFOBT screening strategies. Strategies varied by age to begin, age to end, and screening interval. Efficient and near-efficient strategies with an age to begin of 50 or 55 years are labeled.

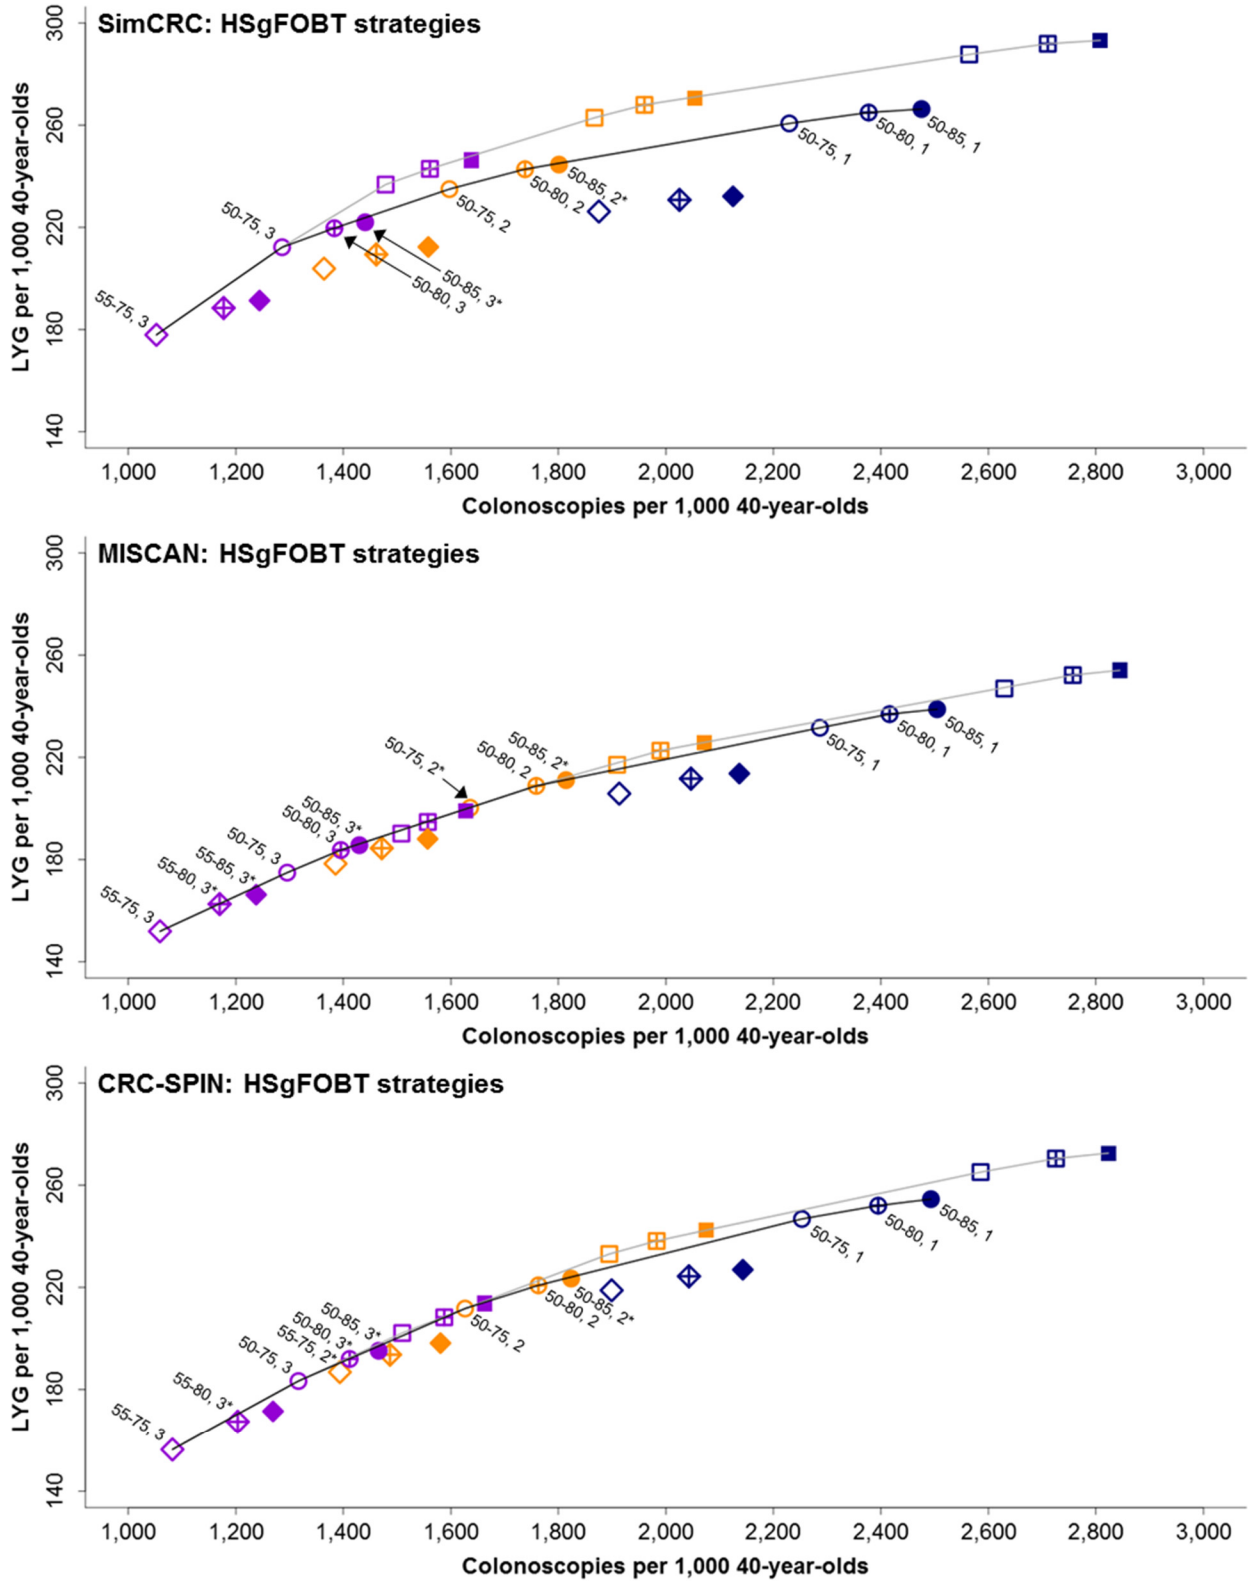

| Interval (color) | Age to begin-age to end screening (symbol) | Efficient frontier                                                                                           |
|------------------|--------------------------------------------|--------------------------------------------------------------------------------------------------------------|
| 3 y (purple)     | □ 45-75 y                                  | — With age to begin screening of 45, 50, or 55 y                                                             |
| 2 y (orange)     | ○ 50-75 y                                  | — With age to begin screening of 50 or 55 y                                                                  |
| 1 y (blue)       | ◇ 55-75 y                                  | * indicates strategy is near-efficient (ie, weakly dominated with LYG within 98% of the efficient frontier). |
|                  | ⊕ 45-80 y                                  |                                                                                                              |
|                  | ● 50-85 y                                  |                                                                                                              |
|                  | ⊕ 50-80 y                                  |                                                                                                              |
|                  | ⊕ 55-80 y                                  |                                                                                                              |
|                  | ⊕ 50-85 y                                  |                                                                                                              |
|                  | ⊕ 50-75 y                                  |                                                                                                              |
|                  | ⊕ 50-80 y                                  |                                                                                                              |
|                  | ⊕ 50-85 y                                  |                                                                                                              |

CRC-SPIN indicates Colorectal Cancer Simulated Population Model for Incidence and Natural History; HSgFOBT, high-sensitivity guaiac-based fecal occult blood test; LYG, life-years gained compared with no screening; MISCAN, Microsimulation Screening Analysis; SimCRC, Simulation Model of Colorectal Cancer. An interactive version of this figure is available at [https://resources.cisnet.cancer.gov/projects/#crrcr/uspstf/figures?figure=efig\\_3](https://resources.cisnet.cancer.gov/projects/#crrcr/uspstf/figures?figure=efig_3).

**eFigure 4.** Lifetime number of colonoscopies and LYG for a cohort of 40-year-olds for FIT screening strategies. Strategies varied by age to begin, age to end, and screening interval. Efficient and near-efficient strategies with an age to begin of 50 or 55 years are labeled.

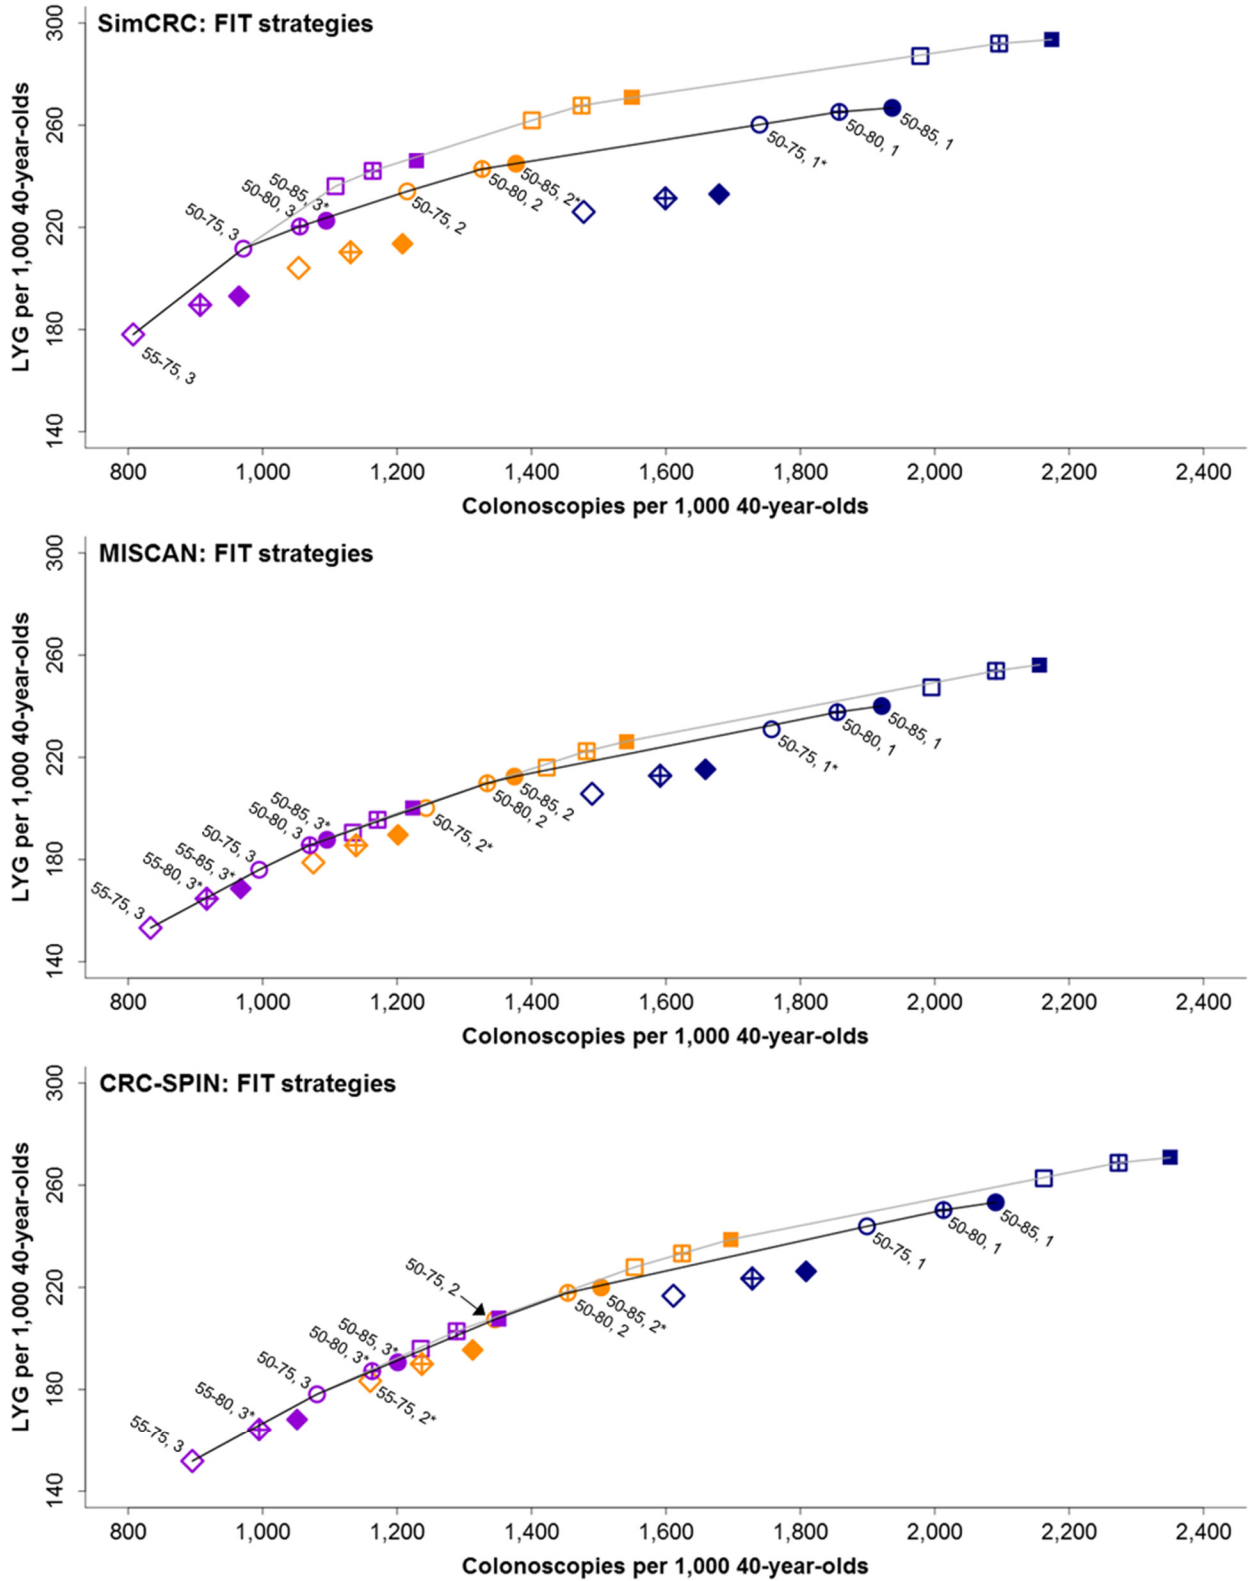

| Interval (color) | Age to begin-age to end screening (symbol) | Efficient frontier                                                                                           |
|------------------|--------------------------------------------|--------------------------------------------------------------------------------------------------------------|
| 3 y (purple)     | □ 45-75 y                                  | — With age to begin screening of 45, 50, or 55 y                                                             |
| 2 y (orange)     | ⊕ 45-80 y                                  | — With age to begin screening of 50 or 55 y                                                                  |
| 1 y (blue)       | ● 45-85 y                                  | * indicates strategy is near-efficient (ie, weakly dominated with LYG within 98% of the efficient frontier). |
|                  | ○ 50-75 y                                  |                                                                                                              |
|                  | ⊕ 50-80 y                                  |                                                                                                              |
|                  | ● 50-85 y                                  |                                                                                                              |
|                  | ◇ 55-75 y                                  |                                                                                                              |
|                  | ⊕ 55-80 y                                  |                                                                                                              |
|                  | ◆ 55-85 y                                  |                                                                                                              |

CRC-SPIN indicates Colorectal Cancer (CRC) Simulated Population Model for Incidence and Natural History; FIT, fecal immunochemical test with a positivity cutoff of  $\geq 100$  ng of hemoglobin (Hb) per mL of buffer ( $\geq 20$   $\mu\text{g}$  Hb/g of feces); LYG, life-years gained compared with no screening; MISCAN, Microsimulation Screening Analysis; SimCRC, Simulation Model of CRC.

An interactive version of this figure is available at [https://resources.cisnet.cancer.gov/projects/#crrc/uspstf/figures?figure=efig\\_4](https://resources.cisnet.cancer.gov/projects/#crrc/uspstf/figures?figure=efig_4).

© 2016 American Medical Association. All rights reserved.

**eFigure 5.** Lifetime number of colonoscopies and LYG for a cohort of 40-year-olds for FIT-DNA screening strategies. Strategies varied by age to begin, age to end, and screening interval. Efficient and near-efficient strategies with an age to begin of 50 or 55 years are labeled.

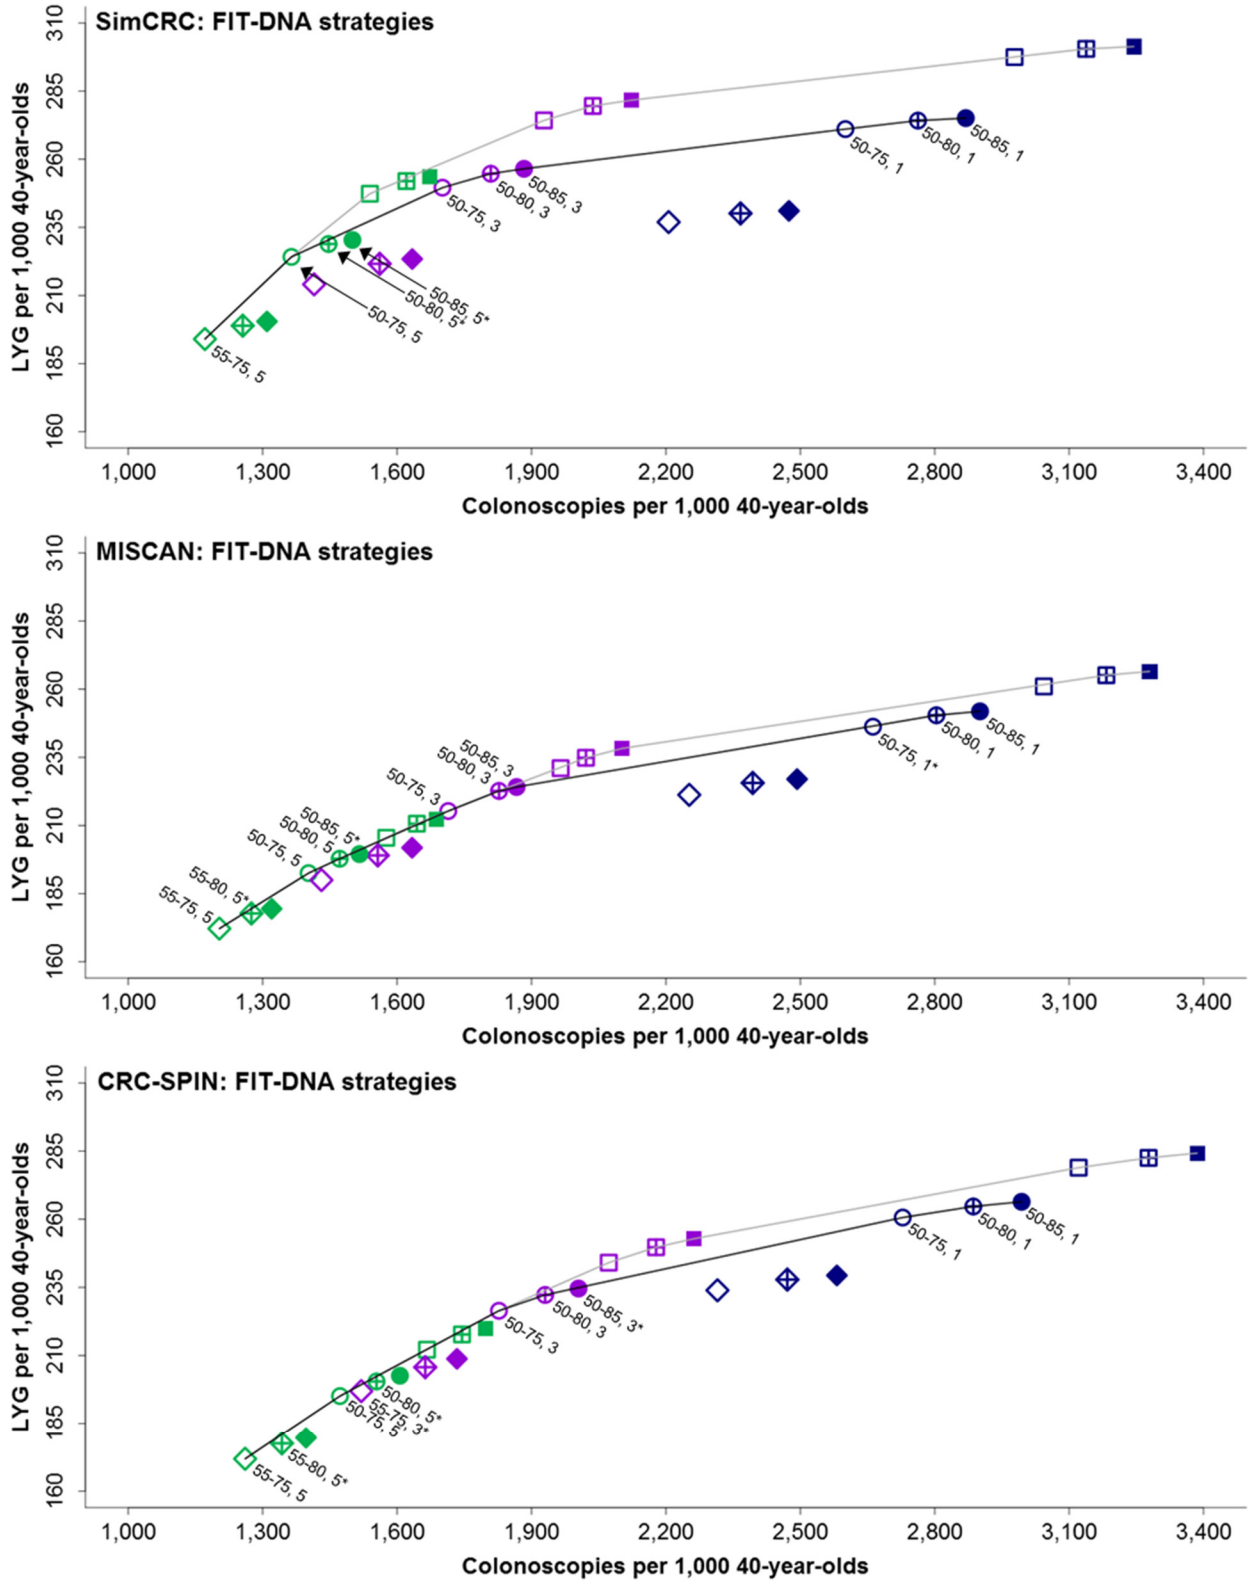

| Interval (color) | Age to begin-age to end screening (symbol) | Efficient frontier                                                                                           |
|------------------|--------------------------------------------|--------------------------------------------------------------------------------------------------------------|
| 5 y              | □ 45-75 y    ⊞ 45-80 y    ■ 45-85 y        | — With age to begin screening of 45, 50, or 55 y                                                             |
| 3 y              | ○ 50-75 y    ⊕ 50-80 y    ● 50-85 y        | — With age to begin screening of 50 or 55 y                                                                  |
| 1 y              | ◇ 55-75 y    ⊖ 55-80 y    ◆ 55-85 y        | * indicates strategy is near-efficient (ie, weakly dominated with LYG within 98% of the efficient frontier). |

CRC-SPIN indicates Colorectal Cancer (CRC) Simulated Population Model for Incidence and Natural History; FIT-DNA, multitarget stool DNA test (fecal immunochemical test with a DNA stool test); LYG, life-years gained compared with no screening; MISCAN, Microsimulation Screening Analysis; SimCRC, Simulation Model of CRC.

An interactive version of this figure is available at [https://resources.cisnet.cancer.gov/projects/#crccr/uspstf/figures?figure=efig\\_5](https://resources.cisnet.cancer.gov/projects/#crccr/uspstf/figures?figure=efig_5).



**eFigure 6.** Lifetime number of colonoscopies and LYG for a cohort of 40-year-olds for SIG screening strategies. Strategies varied by age to begin, age to end, and screening interval. Efficient and near-efficient strategies with an age to begin of 50 or 55 years are labeled.

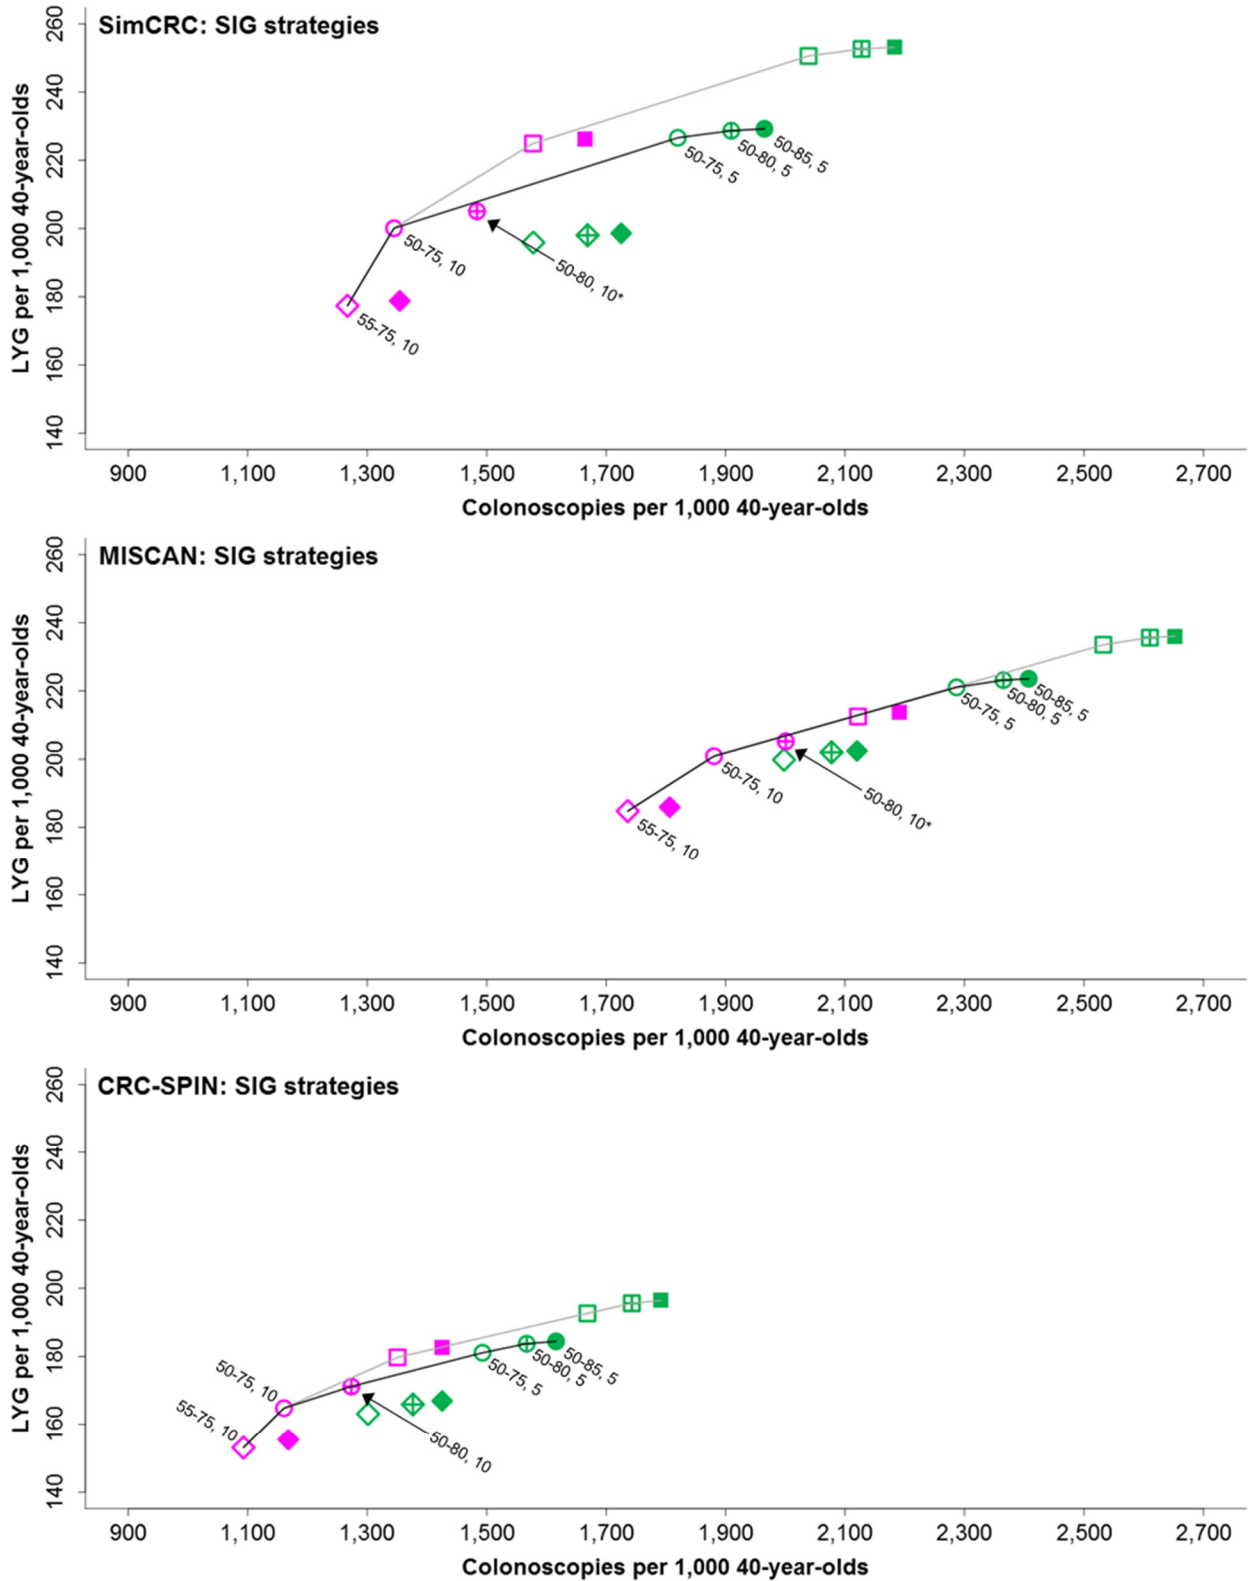

| Interval (color) | Age to begin-age to end screening (symbol) | Efficient frontier                                                                                           |
|------------------|--------------------------------------------|--------------------------------------------------------------------------------------------------------------|
| 10 y             | □ 45-75 y                                  | — With age to begin screening of 45, 50, or 55 y                                                             |
| 5 y              | ○ 50-75 y                                  | — With age to begin screening of 50 or 55 y                                                                  |
|                  | ◇ 55-75 y                                  | * indicates strategy is near-efficient (ie, weakly dominated with LYG within 98% of the efficient frontier). |
|                  | ⊕ 50-80 y                                  |                                                                                                              |
|                  | ⊗ 55-80 y                                  |                                                                                                              |
|                  | ■ 45-85 y                                  |                                                                                                              |
|                  | ● 50-85 y                                  |                                                                                                              |
|                  | ◆ 55-85 y                                  |                                                                                                              |

CRC-SPIN indicates Colorectal Cancer (CRC) Simulated Population Model for Incidence and Natural History; LYG, life-years gained compared with no screening; MISCAN, Microsimulation Screening Analysis; SIG indicates flexible sigmoidoscopy; SimCRC, Simulation CRC.

An interactive version of this figure is available at [https://resources.cisnet.cancer.gov/projects/#crrc/uspstf/figures?figure=efig\\_6](https://resources.cisnet.cancer.gov/projects/#crrc/uspstf/figures?figure=efig_6).

© 2016 American Medical Association. All rights reserved.

**eFigure 7.** Lifetime number of colonoscopies and LYG for a cohort of 40-year-olds for SIG+HSgFOBT screening strategies. Strategies varied by age to begin, age to end, and screening interval.<sup>a</sup> Efficient and near-efficient strategies with an age to begin of 50 or 55 years are labeled.

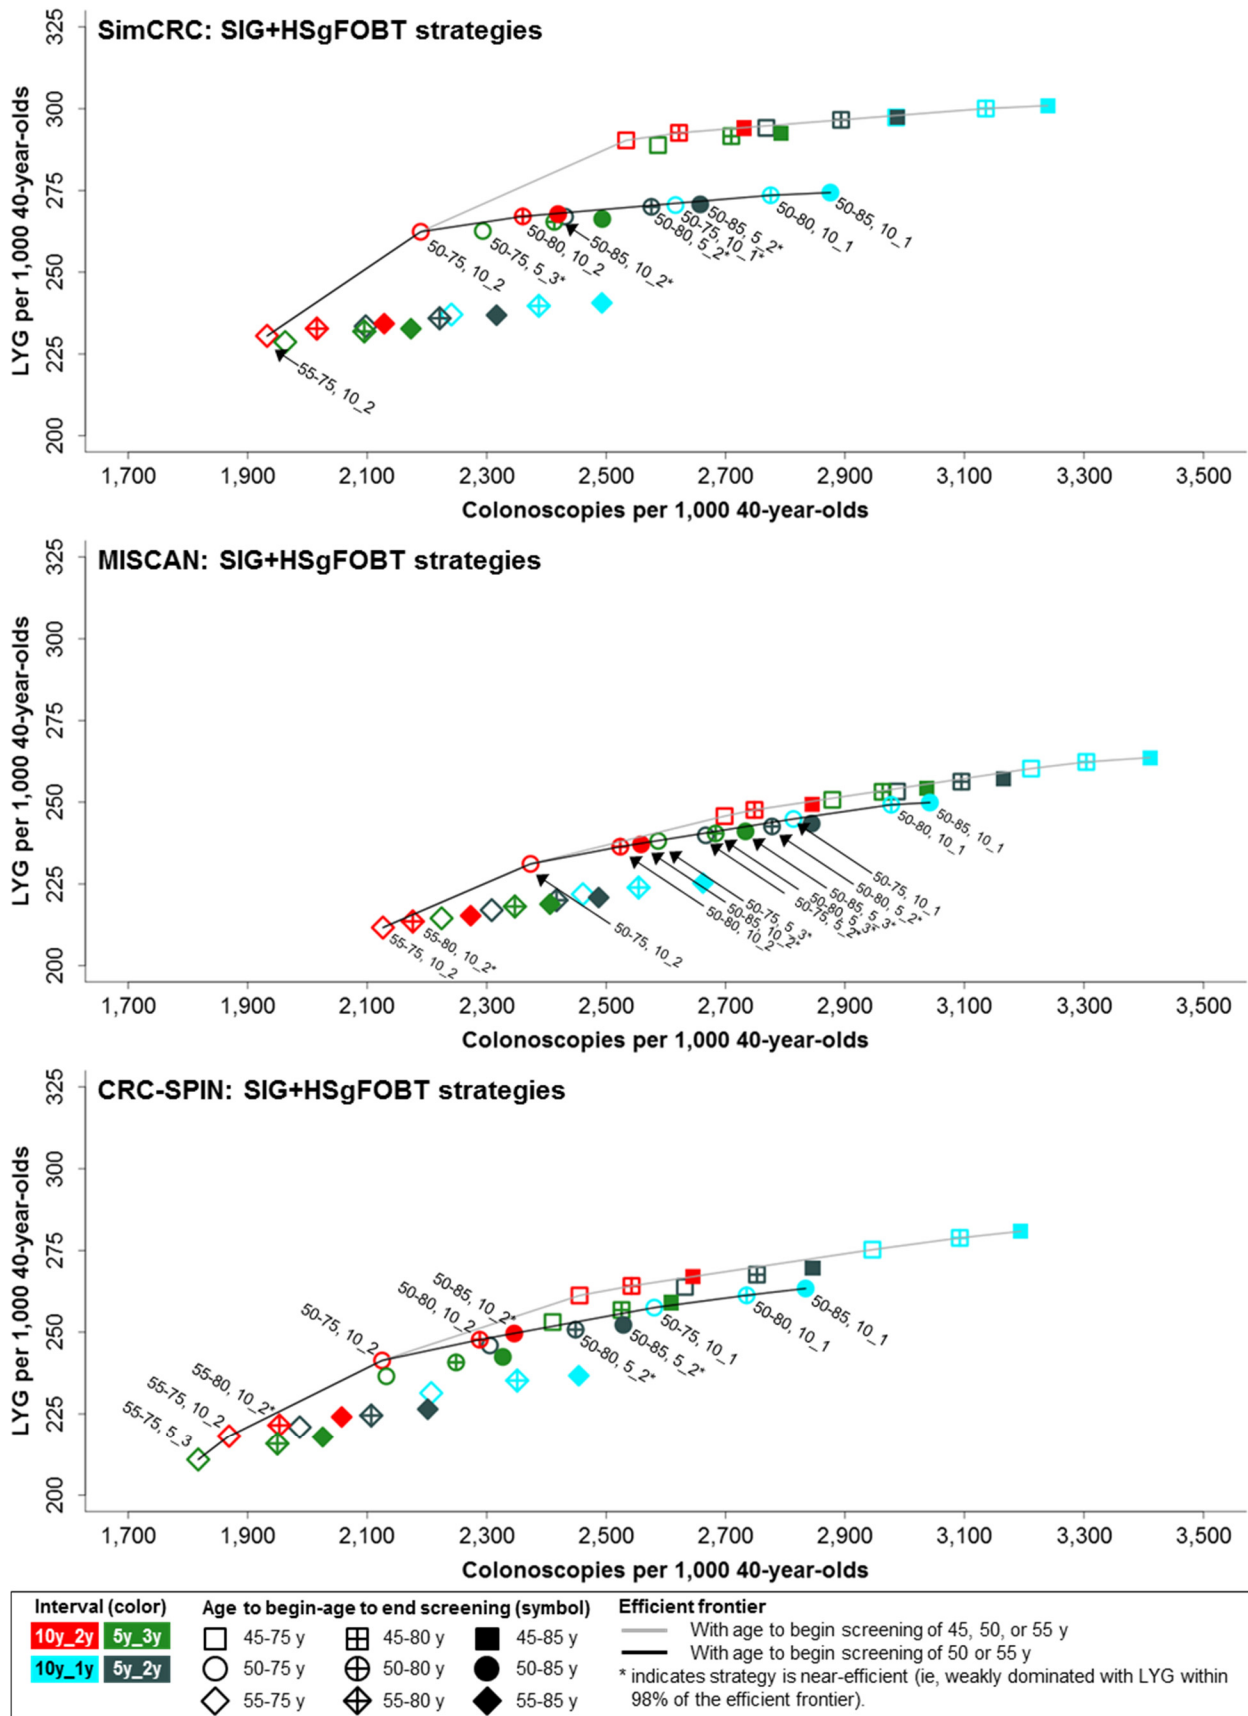

CRC-SPIN indicates Colorectal Cancer (CRC) Simulated Population Model for Incidence and Natural History; HSgFOBT, high-sensitivity guaiac-based fecal occult blood test; LYG, life-years gained compared with no screening; MISCAN, Microsimulation Screening Analysis; SIG, flexible sigmoidoscopy; SimCRC, Simulation Model of CRC.

An interactive version of this figure is available at [https://resources.cisnet.cancer.gov/projects/#crcr/uspstf/figures?figure=efig\\_7](https://resources.cisnet.cancer.gov/projects/#crcr/uspstf/figures?figure=efig_7).

<sup>a</sup> The first interval is for SIG and the second interval is for HSgFOBT.

© 2016 American Medical Association. All rights reserved.

**eFigure 8.** Lifetime number of colonoscopies and LYG for a cohort of 40-year-olds for SIG+FIT screening strategies. Strategies varied by age to begin, age to end, and screening interval.<sup>a</sup> Efficient and near-efficient strategies with an age to begin of 50 or 55 years are labeled.

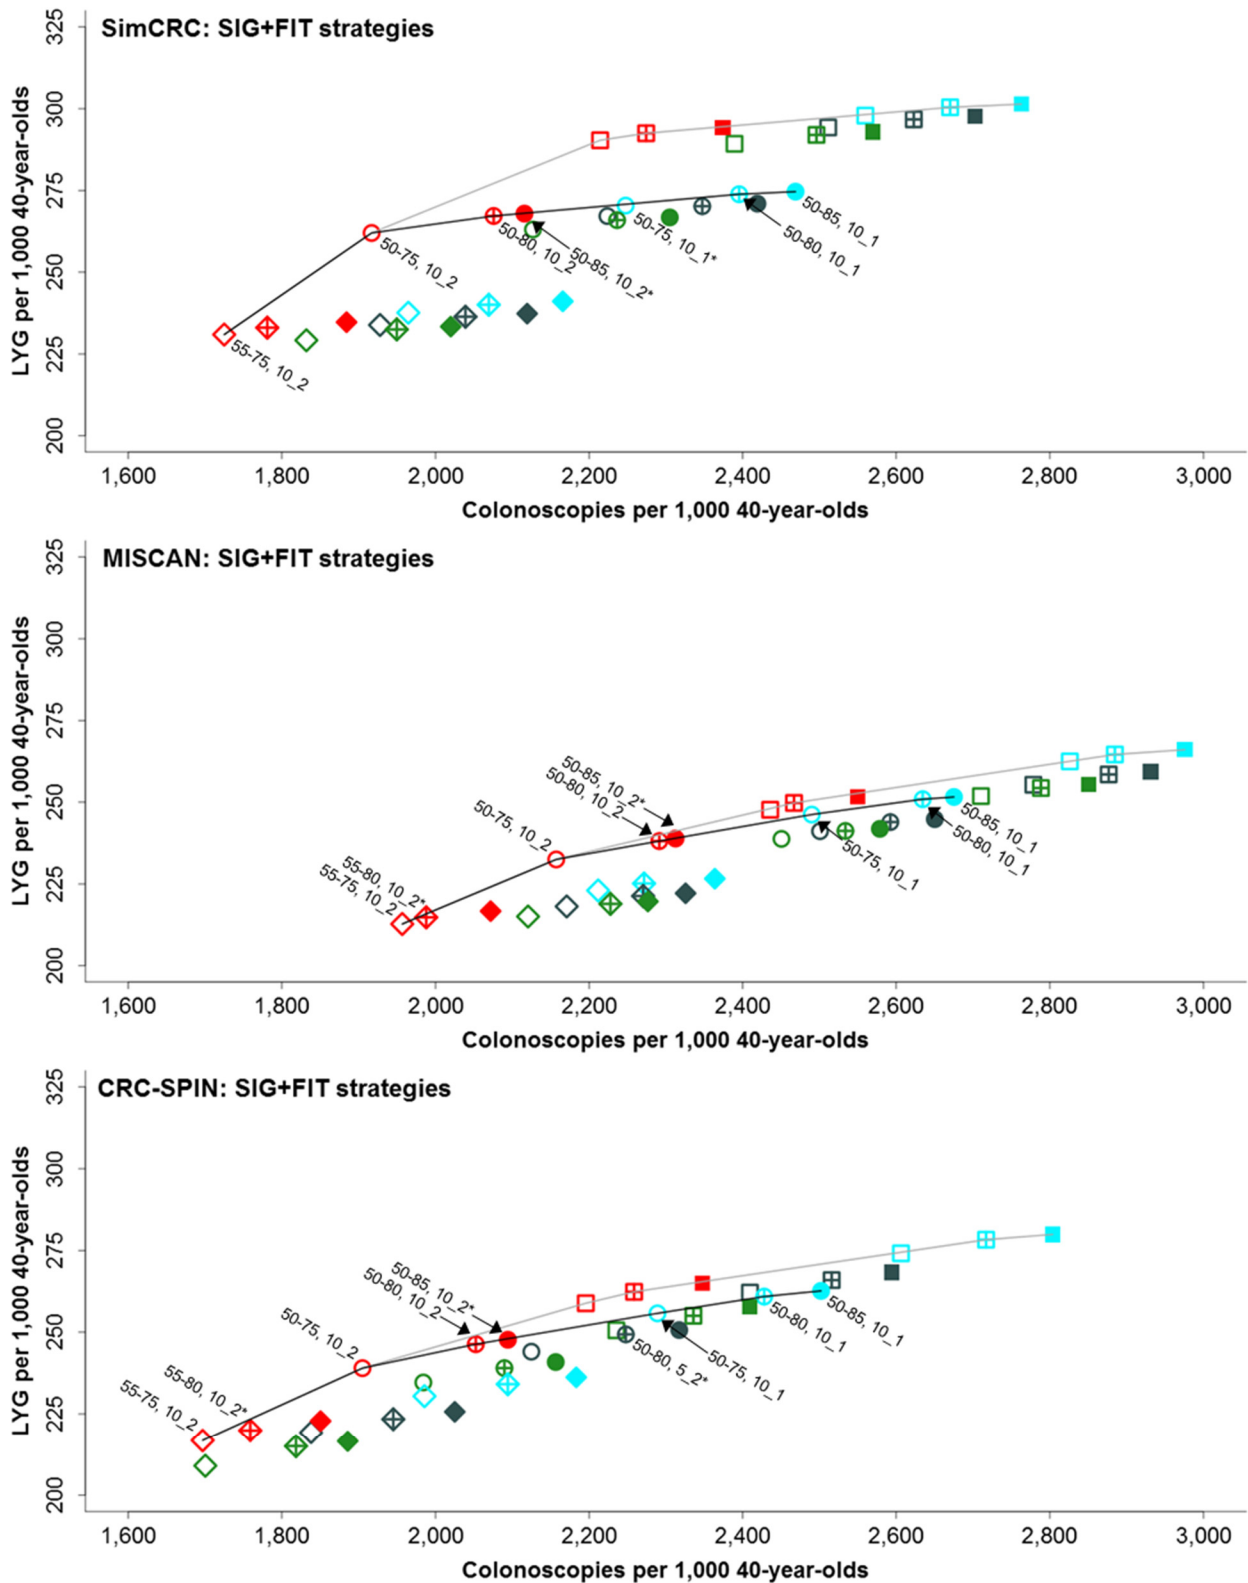

| Interval (color) | Age to begin-age to end screening (symbol) | Efficient frontier                                                                                           |
|------------------|--------------------------------------------|--------------------------------------------------------------------------------------------------------------|
| 10y_2y           | □ 45-75 y                                  | — With age to begin screening of 45, 50, or 55 y                                                             |
| 5y_3y            | ⊞ 45-80 y                                  | — With age to begin screening of 50 or 55 y                                                                  |
| 10y_1y           | ○ 50-75 y                                  | * indicates strategy is near-efficient (ie, weakly dominated with LYG within 98% of the efficient frontier). |
| 5y_2y            | ⊕ 50-80 y                                  |                                                                                                              |
|                  | ● 50-85 y                                  |                                                                                                              |
|                  | ◇ 55-75 y                                  |                                                                                                              |
|                  | ⊞ 55-80 y                                  |                                                                                                              |
|                  | ◆ 55-85 y                                  |                                                                                                              |

CRC-SPIN, Colorectal Cancer (CRC) Simulated Population Model for Incidence and Natural History; FIT, fecal immunochemical test with a positivity cutoff of  $\geq 100$  ng of hemoglobin (Hb) per mL of buffer ( $\geq 20$   $\mu$ g Hb/g of feces); LYG, life-years gained compared with no screening; MISCAN, Microsimulation Screening Analysis; SIG, flexible sigmoidoscopy; SimCRC, Simulation Model of CRC. An interactive version of this figure is available at [https://resources.cisnet.cancer.gov/projects/#crrc/uspstf/figures?figure=efig\\_8](https://resources.cisnet.cancer.gov/projects/#crrc/uspstf/figures?figure=efig_8).

<sup>a</sup> The first interval is for SIG and the second interval is for FIT.  
© 2016 American Medical Association. All rights reserved.

**eFigure 9.** Lifetime number of colonoscopies and LYG for a cohort of 40-year-olds for CTC screening strategies. Strategies varied by age to begin, age to end, and screening interval. Efficient and near-efficient strategies with an age to begin of 50 or 55 years are labeled.

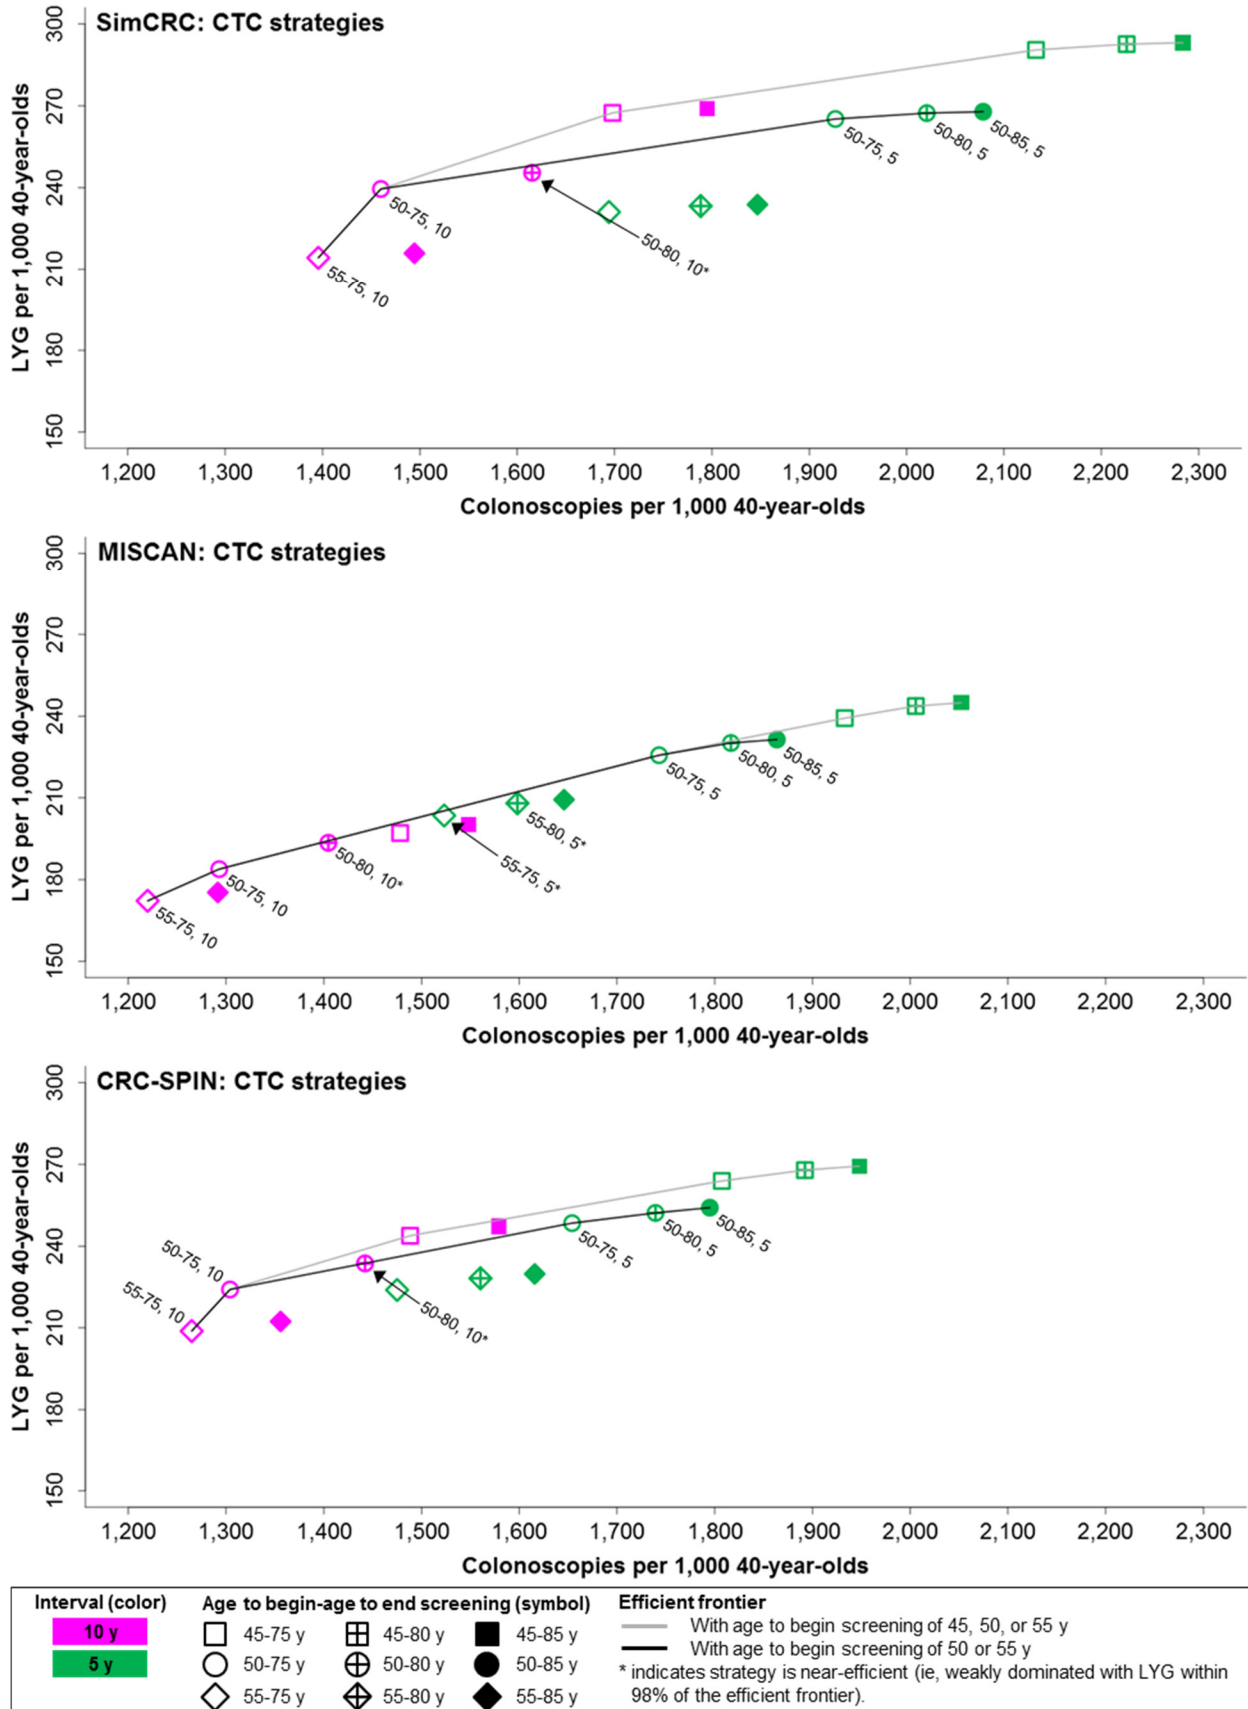

CRC-SPIN indicates Colorectal Cancer (CRC) Simulated Population Model for Incidence and Natural History; CTC, computed tomographic colonography; LYG, life-years gained compared with no screening; MISCAN, Microsimulation Screening Analysis; SimCRC, Simulation Model of CRC.

An interactive version of this figure is available at [https://resources.cisnet.cancer.gov/projects/#crrcr/uspstf/figures?figure=efig\\_9](https://resources.cisnet.cancer.gov/projects/#crrcr/uspstf/figures?figure=efig_9).

© 2016 American Medical Association. All rights reserved.

**eFigure 10.** Lifetime number of colonoscopies and LYG for a cohort of 40-year-olds with SIG combined with stool-based testing strategies (SIG+FIT, SIG+HSgFOBT). Strategies varied by age to begin (50 or 55 years only), age to end, and screening interval.<sup>a</sup> Efficient and near-efficient strategies are labeled.

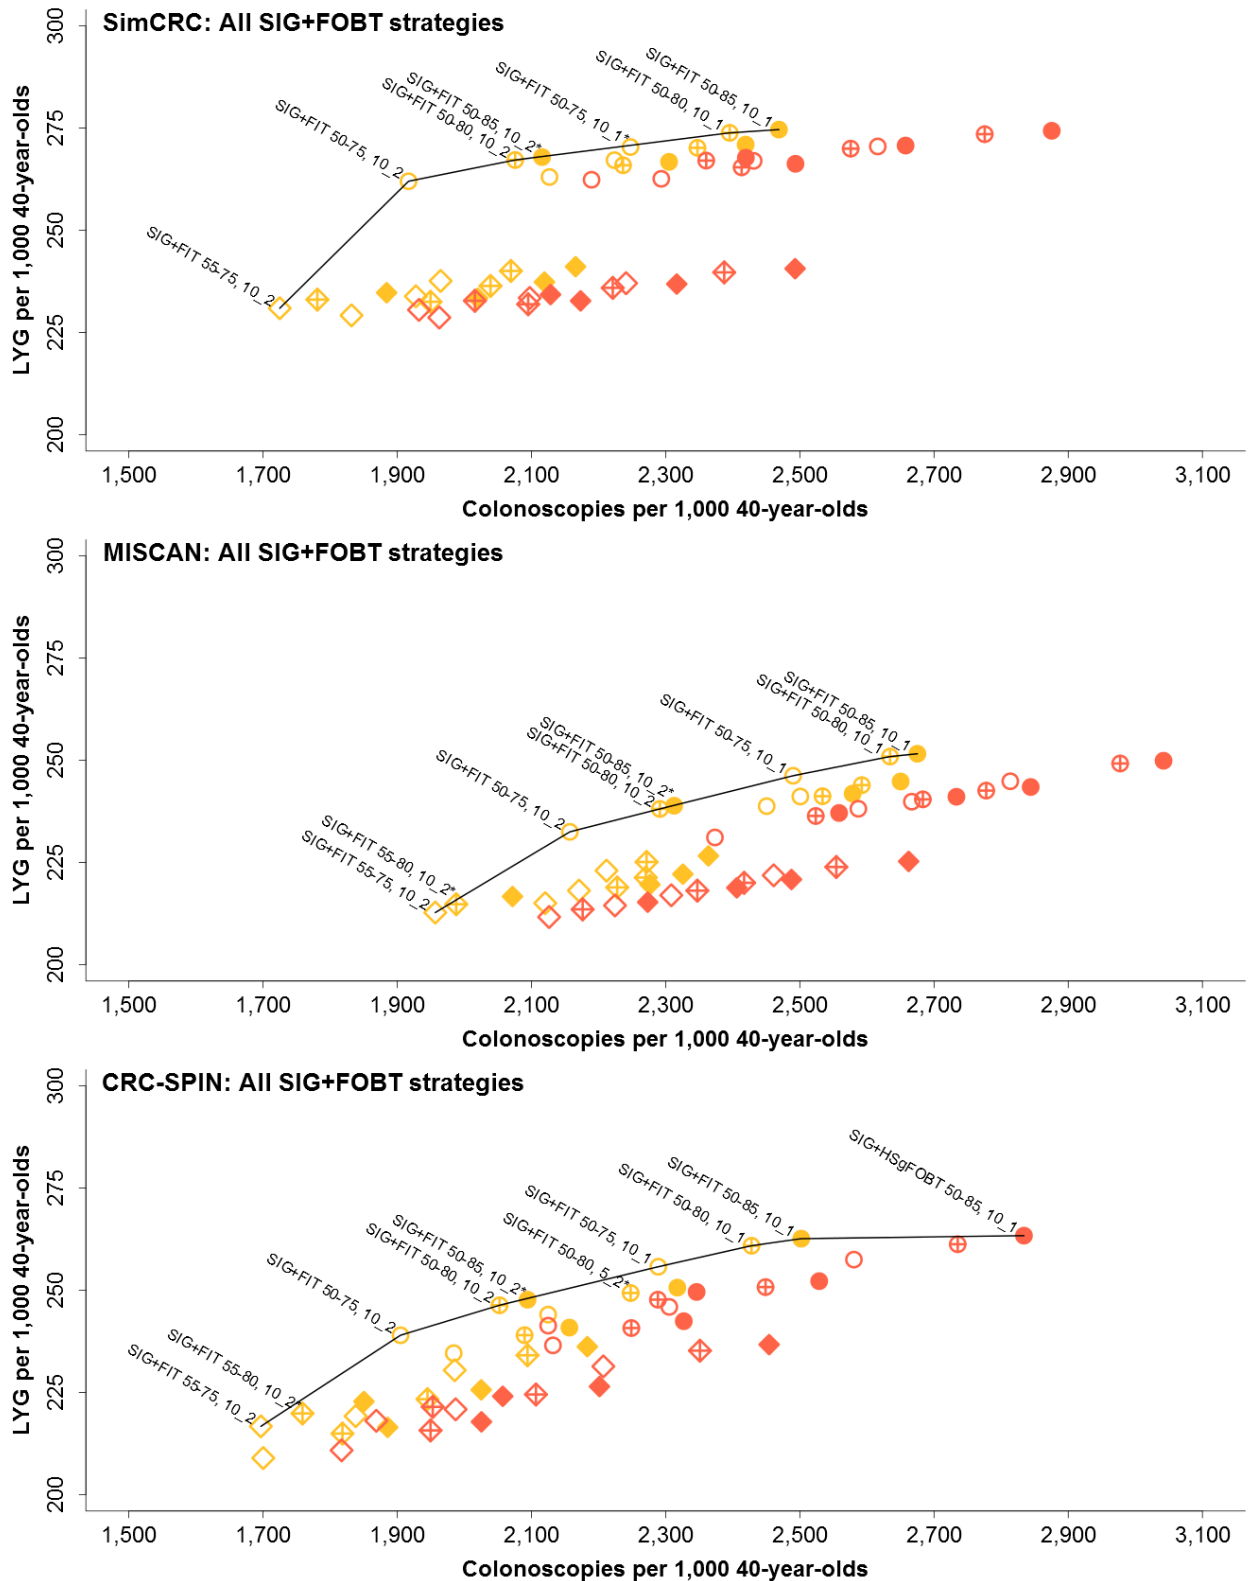

CRC-SPIN indicates Colorectal Cancer (CRC) Simulated Population Model for Incidence and Natural History; FIT, fecal immunochemical test with positivity cutoff of  $\geq 100$  ng of hemoglobin (Hb) per mL of buffer ( $\geq 20$   $\mu\text{g}$  Hb/g of feces); HSgFOBT, high-sensitivity guaiac-based fecal occult blood test; LYG, life-years gained compared with no screening; MISCAN, Microsimulation Screening Analysis; SIG, flexible sigmoidoscopy; SimCRC, Simulation Model of CRC.

An interactive version of this figure is available at [https://resources.cisnet.cancer.gov/projects/#crcr/uspstf/figures?figure=efig\\_10](https://resources.cisnet.cancer.gov/projects/#crcr/uspstf/figures?figure=efig_10).

<sup>a</sup> The first interval is for SIG and the second interval is for the stool test.

© 2016 American Medical Association. All rights reserved.

## REFERENCES

1. Imperiale TF, Ransohoff DF, Itzkowitz SH, et al. Multitarget stool DNA testing for colorectal-cancer screening. *N Engl J Med*. 2014;370(14):1287-1297.
2. de Wijkerslooth TR, Stoop EM, Bossuyt PM, et al. Immunochemical fecal occult blood testing is equally sensitive for proximal and distal advanced neoplasia. *Am J Gastroenterol*. 2012;107(10):1570-1578.
3. Lin JS, Piper MA, Perdue LA, et al. *Screening for Colorectal Cancer: A Systematic Evidence Review for the US Preventive Services Task Force: Evidence Synthesis No. 135*. Rockville, MD: Agency for Healthcare Research and Quality; 2016. AHRQ Publication 14-05203-EF-1.2015.
4. van Hees F, Zauber AG, Klabunde CN, Goede SL, Lansdorp-Vogelaar I, van Ballegooijen M. The appropriateness of more intensive colonoscopy screening than recommended in Medicare beneficiaries: a modeling study. *JAMA Intern Med*. 2014;174(10):1568-1576.
5. Warren JL, Klabunde CN, Mariotto AB, et al. Adverse events after outpatient colonoscopy in the Medicare population. *Ann Intern Med*. 2009;150(12):849-857, W152.
